# Supplementary material for: The best practice for microbiome analysis using R
Source: PubMed Central journal article supplement (PMC10599642; doi:10.1093/procel/pwad024), 2023-05-02

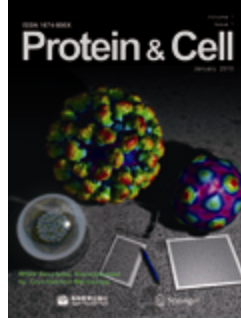

### The best practice for microbiome analysis using R

|                               |                                                                                                                                                                                                                                                                                                                                                          |
|-------------------------------|----------------------------------------------------------------------------------------------------------------------------------------------------------------------------------------------------------------------------------------------------------------------------------------------------------------------------------------------------------|
| Journal:                      | <i>Protein &amp; Cell</i>                                                                                                                                                                                                                                                                                                                                |
| Manuscript ID                 | P-C-02-2023-0084.R1                                                                                                                                                                                                                                                                                                                                      |
| Manuscript Type:              | Review                                                                                                                                                                                                                                                                                                                                                   |
| Date Submitted by the Author: | 28-Mar-2023                                                                                                                                                                                                                                                                                                                                              |
| Complete List of Authors:     | Wen, Tao; Chinese Academy of Agricultural Sciences; Nanjing Agricultural University<br>Niu, Guoqing; Nanjing Agricultural University<br>Chen, Tong; China Academy of Chinese Medical Sciences<br>Shen, Qirong; Nanjing Agricultural University<br>Yuan, Jun; Nanjing Agricultural University,<br>Liu, Yong-Xin; Chinese Academy of Agricultural Sciences |
| Keywords:                     | microbiome, R package, data analysis, visualization                                                                                                                                                                                                                                                                                                      |
|                               |                                                                                                                                                                                                                                                                                                                                                          |

SCHOLARONE™  
Manuscripts

# The best practice for microbiome analysis using R

Tao Wen<sup>1,2,‡</sup>, Guoqing Niu<sup>2,‡</sup>, Tong Chen<sup>3</sup>, Qirong Shen<sup>2</sup>, Jun Yuan<sup>2,\*</sup>, Yong-Xin Liu<sup>1,\*</sup>

<sup>1</sup>Shenzhen Branch, Guangdong Laboratory of Lingnan Modern Agriculture, Genome Analysis Laboratory of the Ministry of Agriculture and Rural Affairs, Agricultural Genomics Institute at Shenzhen, Chinese Academy of Agricultural Sciences, Shenzhen, Guangdong 518120, China

<sup>2</sup>The Key Laboratory of Plant Immunity Jiangsu Provincial Key Lab for Organic Solid Waste Utilization Jiangsu Collaborative Innovation Center for Solid Organic Waste Resource Utilization, National Engineering Research Center for Organic-based Fertilizers, Nanjing Agricultural University, Nanjing 210095, China

<sup>3</sup>National Resource Center for Chinese Materia Medica, China Academy of Chinese Medical Sciences, Beijing, China

<sup>‡</sup>These authors contributed equally to this work

\*Correspondence: [junyuan@njau.edu.cn](mailto:junyuan@njau.edu.cn) (J. Yuan), [liuyongxin@caas.cn](mailto:liuyongxin@caas.cn) (Y.-X. Liu)

## 18 **Abstract**

19 With the gradual maturity of sequencing technology, many microbiome studies  
20 have published, driving the emergence and advance of related analysis tools. R  
21 language is the widely used platform for microbiome data analysis for powerful  
22 functions. However, tens of thousands of R packages and numerous similar analysis  
23 tools have brought major challenges for many researchers to explore microbiome data.  
24 How to choose suitable, efficient, convenient, and easy-to-learn tools from the  
25 numerous R packages has become a problem for many microbiome researchers. We  
26 have organized 322 common R packages for microbiome analysis and classified them  
27 according to application categories (diversity, [difference](#), biomarker, correlation and  
28 network analysis, functional prediction, and others), which could help researchers  
29 quickly find relevant R packages for microbiome analysis. Furthermore, we  
30 systematically sorted the integrated R packages (**phyloseq**, **microbiome**,  
31 **MicrobiomeAnalystR**, **Animalcules**, **microeco**, and **amplicon**) for microbiome  
32 analysis, and summarized the advantages and limitations, which will help researchers  
33 choose the appropriate tools. Finally, we thoroughly reviewed the R packages for  
34 microbiome analysis, summarized most of the common analysis content in the  
35 microbiome, and formed the most suitable pipeline for microbiome analysis. This paper  
36 is accompanied by hundreds of examples with 10,000 lines codes, which can help  
37 beginners to learn ([C1-2 in GitHub](#)), also help analysts compare and test different tools  
38 ([C3-4 in GitHub](#)). This paper systematically sorts the application of R in microbiome,  
39 providing an important theoretical basis and practical reference for the development of

1  
2  
3  
4 40 better microbiome tools in the future. All the code is available at GitHub:

5  
6  
7 41 <https://github.com/taowenmicro/EasyMicrobiomeR>.

8  
9 42 **Keywords** R package, microbiome, data analysis, visualization

## 10 11 43 **Introduction**

12  
13  
14 44 The metagenomic analysis is used to study microbial diversity, structure, and  
15  
16  
17 45 function by sequencing, quantifying, annotating, and analyzing DNA and/or RNA  
18  
19  
20 46 sequences of microbial communities or microbiota. The commonly used high-  
21  
22  
23 47 throughput sequencing technology in microbiome research is mainly known as  
24  
25  
26 48 amplicon sequencing and shotgun metagenomic sequencing. Amplicon sequencing  
27  
28  
29 49 with the advantages of low cost, mature analysis system, and simple analysis process  
30  
31  
32 50 was widely used in microbiome research. Shotgun metagenomic sequencing provided  
33  
34  
35 51 the functional information of microbes and more accurate information on the microbial  
36  
37  
38 52 composition with the higher sequencing cost and large amount of computational  
39  
40  
41 53 resources needed. The detail pipeline for both sequencing have been systemically  
42  
43  
44 54 summarized in our previous review (Liu et al., 2021b) As an important component of  
45  
46  
47 55 biodiversity, microbial communities play a vital role in biology, ecology,  
48  
49  
50 56 biotechnology, agriculture, and medicine. Various bioinformatics methods are required  
51  
52  
53 57 for microbial community analysis, which mainly includes three parts: 1) data  
54  
55  
56 58 preprocessing, 2) quantification and annotation, and 3) statistics and visualization (Fig.  
57  
58  
59 59 1A). In the preprocessing step, the raw data is filtered and quality controlled to ensure  
60  
61  
62 60 data quality. In the quantification and annotation step, tools and databases are used to  
63  
64  
65 61 identify microbial representative sequences and annotate microbial taxonomy and  
66  
67  
68  
69  
70

1  
2  
3  
4 62 function. The first two parts of microbial community analysis have been well discussed  
5  
6 63 and could be well done according to our previous papers (Liu et al., 2023). Finally, in  
7  
8  
9 64 the statistics and visualization step, various statistical methods are used to explore  
10  
11  
12 65 microbial community diversity, structure, and potential functions.  
13

14 66 With the development of high-throughput sequencing technology, plenty of  
15  
16  
17 67 studies were performed with amplicon-sequencing technology (Thompson et al., 2017;  
18  
19  
20 68 Proctor et al., 2019) and shotgun metagenomes sequencing (Carrión et al., 2019; Paoli  
21  
22 69 et al., 2022), which led to the development of microbiome analysis methodologies,  
23  
24  
25 70 software, and pipelines, e.g., QIIME (Caporaso et al., 2010), Mothur (Schloss et al.,  
26  
27  
28 71 2009), USEARCH (Edgar, 2010), VSEARCH (Rognes et al., 2016), QIIME 2 (Bolyen  
29  
30 72 et al., 2019), Parallel-Meta Suite (Chen et al., 2022), EasyAmplicon (Liu et al., 2023),  
31  
32  
33 73 Kraken (Wood and Salzberg, 2014), MEGAN (Huson et al., 2007), MetaPhlAn2  
34  
35 74 (Truong et al., 2015), HUMAnN2 (Franzosa et al., 2018) etc. As the most crucial and  
36  
37  
38 75 basic procedure for amplicon sequencing data analysis, OTU (Operational taxonomic  
39  
40  
41 76 unit) clustering method was popular before the year of 2015 while non-clustering  
42  
43  
44 77 methods were gradually developed and widely used recently. Currently, the common  
45  
46  
47 78 non-clustering methods include DADA2 (Callahan et al., 2016), deblur (Amir et al.,  
48  
49  
50 79 2017), unoise3 (Edgar, 2016). One of the most representative non-clustering algorithms  
51  
52  
53 80 among them is DADA2, which was created with R language. It makes the R language  
54  
55  
56 81 (Ihaka and Gentleman, 1996) occupy an important position in raw data processing for  
57  
58  
59 82 amplicon sequencing. Compared with many software that can be used in upstream steps  
60  
83 of microbiota sequencing data analysis, the downstream analysis steps rely on the R

1  
2  
3  
4 84 language heavily with various packages. These analyses mainly include: 1) Diversity  
5  
6 85 analysis; 2) Difference analysis; 3) Correlation and network analysis; 4) Biomarker  
7  
8  
9 86 identification; 5) Functional predictions; 6) Integrative analysis of microbial  
10  
11  
12 87 communities with other indicators (including phylogenetic analysis, multi-omics  
13  
14 88 integration, and environmental factor analysis, *etc.*). In addition to the kinds of  
15  
16  
17 89 multivariate statistical analysis that can be done in R, there are diversified data-cleaning  
18  
19  
20 90 packages that allow data to be transformed among different analyses.

21  
22 91 R is a free, open-source language and environment for data statistical analysis and  
23  
24  
25 92 visualization, which was created by Ross Ihaka and Robert Gentleman from the  
26  
27  
28 93 University of Auckland in New Zealand and now is responsible by the "R Development  
29  
30  
31 94 Core Team". Compared with other analysis tools, such as SPSS, MINITAB, MATLAB,  
32  
33  
34 95 which are more suitable for the statistics of processed and standardized data, R language  
35  
36  
37 96 can handle processed data as well as raw data. R can easily implement almost all  
38  
39  
40 97 analysis methods, many of the latest methods or algorithms were first exhibited in it.  
41  
42  
43 98 Furthermore, R shows excellent data visualization, particularly for complex data. The  
44  
45  
46 99 powerful and flexible interactive analysis is also an advantage of R, meanwhile  
47  
48  
49 100 enabling visual data exploration. The functionality of the R language relies heavily on  
50  
51  
52 101 thousands of R packages, which provide a wide variety of data processing and analysis  
53  
54  
55 102 strategies, allowing almost any data analysis process to be done in R. The total number  
56  
57  
58 103 of R packages published on CRAN is 18,981, and Bioconductor is 2,183 (by January  
59  
60 104 31, 2023). These packages demonstrated the powerful data process and analysis  
105 performance of R.

1  
2  
3  
4 106 In recent years, numerous R packages have been developed on the R platform for  
5  
6 107 the downstream analysis of microbiome, which have made important contributions to  
7  
8  
9 108 the associated-research field. However, the increasing number of downstream analysis  
10  
11  
12 109 R packages has reached a dizzying level (Fig. 1B). In addition, integrated R packages  
13  
14 110 containing a large amount of microbiome analysis content, such as **phyloseq**  
15  
16  
17 111 (McMurdie and Holmes, 2013), **microeco** (Liu et al., 2021a), and **amplicon** (Liu et al.,  
18  
19 112 2023), have gradually emerged. This abundance of R packages provides microbiome  
20  
21  
22 113 analysts with more choices, but also makes it difficult to identify the most suitable tools  
23  
24 114 among many similar analysis tools. Furthermore, this plethora of R packages make it  
25  
26  
27 115 difficult for beginners to embark on a well-organized learning path for microbiome  
28  
29  
30 116 analysis. Therefore, it is urgent to compare similar analysis functions, and extract the  
31  
32  
33 117 similarities and differences functions, to select the best process for microbiome analysis  
34  
35 118 and help beginners learn more effectively.

36  
37  
38 119 This paper attempts to sort and run the 322 common R packages (Fig. S1),  
39  
40 120 especially the integrated R packages for microbiome analysis, and complete the  
41  
42  
43 121 following three parts: 1) compare different R package analysis processes according to  
44  
45  
46 122 the functional categories of microbiome analysis, analyze the results, and summarize  
47  
48  
49 123 example code; 2) organize the content of six integrated R packages according to the  
50  
51  
52 124 functional categories of microbiome analysis, compare the analysis results, and  
53  
54 125 generate example code; 3) based on all R packages, select the optimal analysis approach  
55  
56 126 using R language and provide example code for reference and learning to researchers.

## 127 **Preparing microbiome data analysis**

1  
2  
3  
4 128 Downstream analysis of microbiome requires the preparation of five data files,  
5  
6 129 including a feature table, a feature annotation file, a sample metadata file, a  
7  
8  
9 130 phylogenetic tree, and representative sequences. For beginners, it is important to  
10  
11 131 understand the format and basic data structure of these files and learn how to import  
12  
13 132 these files into R language. Furthermore, different analytical contents often have  
14  
15 133 different requirements for data, and it is necessary to learn some data manipulation  
16  
17 134 skills to meet the demands of various functions. Finally, it is necessary to learn the  
18  
19 135 basics of R plotting to facilitate the presentation of results.  
20  
21  
22  
23  
24

## 25 136 **Data preparation and cleaning**

26  
27 137 After the process of sequence data preprocessing and quantification and annotation,  
28  
29 138 we need to further analysis the output files, including importing these files, cleaning  
30  
31 139 data, and converting format and content which required for subsequent microbiome  
32  
33 140 analysis in R. Before statistical analysis, we must master the basic procedure of R  
34  
35 141 language to cope with the data input requirements of different packages. This section  
36  
37 142 includes: importing, organizing, filtering, basic calculations, conversion, normalization,  
38  
39 143 and modification of data. Five data forms are frequently used from raw data processing,  
40  
41 144 including feature tables (file formats are .csv/.txt/.xlsx/.biom, typically used taxonomic  
42  
43 145 and functional tables, including OTU/ASV/taxonomy/gene/module/pathway tables),  
44  
45 146 feature annotation (.csv/.txt/.xlsx/.biom), sample metadata (.csv/.txt),  
46  
47 147 evolutionary/phylogenetic trees (.nwk/.tree), representative sequences (.fasta/.fas/.fa).  
48  
49  
50  
51 148 All the data cleaning-related packages show in Fig. 1C. Tabular data input for microbial  
52  
53 149 community is primarily accomplished using functions such as `read.table()`, `read.delim()`,  
54  
55  
56  
57  
58  
59  
60



1  
2  
3  
4 150 and read.csv() in the **utils** package (Code 1A, script in GitHub). The reading of  
5  
6 151 evolutionary tree files depends on functions like read.tree() in the **ape/ggtree/treeio**  
7  
8  
9 152 package, or read\_tree() in the **phyloseq** package. For reading representative sequence  
10  
11  
12 153 files in microbiome, the readDNAStringSet() in the **Biostrings** package (Pages et al.,  
13  
14 154 2016) is typically used. Currently, big data integration of microbiome has become a  
15  
16  
17 155 trend, and leading to the emergence of R packages for integrated data from multiple  
18  
19  
20 156 studies, likes **curatedMetagenomicData** (Pasolli et al., 2017). The package only needs  
21  
22 157 to import the package and could re-analysis the curated data, rather than input in raw  
23  
24  
25 158 sequencing data.

26  
27 159 The basic idea of data organization can be summarized as three steps: splitting the  
28  
29  
30 160 data, processing with functions, and combining the output results into the desired  
31  
32  
33 161 format. The functions of basic packages in R can be combined to meet most  
34  
35  
36 162 requirements of the microbiome data operations. For example, the “for loop” combined  
37  
38 163 with the basic statistical functions [sum(), mean(), sd(), etc.] can be used to perform  
39  
40  
41 164 basic statistical analysis and data transformations for microbial relative abundance  
42  
43  
44 165 (Code 1B); the **base** package provides the apply family of functions, including apply(),  
45  
46 166 sapply(), lapply(), tapply(), aggregate(), etc., which can be applied to quickly complete  
47  
48  
49 167 the three stages of data processing. The apply family of functions provides a framework  
50  
51  
52 168 that acts as an alternative to “for loop” and is much faster than the basic “for loop”  
53  
54 169 function in R (Code 1B). A similar **purrr** (<https://github.com/tidyverse/purrr>) package  
55  
56 170 can be used in place of “for loop” to perform efficient operations.

57  
58 171 The **plyr** (Wickham and Wickham, 2020) package was upgraded from package of  
59  
60

1  
2  
3  
4 172 **base** with a variety of data sorting processes for kinds of data frames, lists, etc. The  
5  
6 173 **plyr** package provides three data processing stages “Split - Apply - Combine” in one  
7  
8  
9 174 function, and the **plyr** package implements grouping transformations between R types  
10  
11  
12 175 (vector, list, and data frame) and basically replaces the apply family of functions in the  
13  
14 176 **base** package. It can easily handle grouping calculations, e.g., microbial abundance at  
15  
16  
17 177 different taxonomy levels (Code 1C). The **reshape2** (Wickham, 2012) package  
18  
19 178 provides the long-wide format transformation during data processing, and since  
20  
21  
22 179 **ggplot2** (Wickham, 2011) plotting functions and most modeling functions, such as `lm()`,  
23  
24 180 `glm()`, `gam()`, often use long data, microbiome data are general showed as wide form,  
25  
26  
27 181 so the transformation of microbiome data for plotting can be done using **reshape2**  
28  
29  
30 182 (Code 1D), which provides the long-wide format transformation during data processing.

31  
32 183 The **dplyr** (Wickham et al., 2014) package is a member of the tidyverse family,  
33  
34  
35 184 innovatively abandoning the common form of data preservation in R rather than using  
36  
37  
38 185 the tibble format (more powerful than `data.frame` format) for data processing, which  
39  
40  
41 186 can more efficiently complete the data frame selection, merging and statistics within  
42  
43  
44 187 row and column, and data frame length and width format changes, the “%>%” pipeline  
45  
46  
47 188 symbol can be used to complete more complex data processing. The tibble format can  
48  
49  
50 189 store data during the analysis and modeling process, which is important for data  
51  
52  
53 190 analysis. For example, we demonstrated the use of **dplyr** and pipeline to run random  
54  
55  
56 191 forest modeling and the selection process of important variables (Code 1E).

## 192 **Visualization in R language**

57  
58 193 In most cases, we are used to plotting standard graphs in microbiome data display  
59  
60

1  
2  
3  
4 194 such as alpha/beta diversity, taxonomic composition. All the visualization-related  
5  
6 195 packages show in Fig. 1C. Due to the widespread use of **ggplot2** (Code 2A), many  
7  
8  
9 196 extension packages have emerged to extend based on **ggplot2** with a high capacity of  
10  
11  
12 197 plotting styles, colors, and themes. These packages mainly include **ggtern** plotting  
13  
14 198 ternary graphs in Code 2B (Hamilton and Ferry, 2018), **gggraph** plotting network graphs  
15  
16  
17 199 in Code 2C (Si et al., 2020), **ggtree** plotting evolutionary tree or cladogram in Code 2D  
18  
19  
20 200 (Xu et al., 2022) , the **ggalluvial** package, the **ggVennDiagram** package (Code 2E),  
21  
22 201 the **ggstatsplot** package plotting pie chart, and the **ggpubr** package providing many  
23  
24  
25 202 various themes and colors of output. In addition, the **pheatmap** (Kolde, 2012) and  
26  
27  
28 203 **ComplexHeatmap** package (Gu, 2022) based on the grid mapping system plots the  
29  
30  
31 204 relative abundance of features in different samples (Code 2F), the **VennDiagram**  
32  
33 205 package (Chen and Boutros, 2011) could show the number of features in different  
34  
35  
36 206 samples. The **Upset** package (Conway et al., 2017), which draws Upset view is a new  
37  
38  
39 207 form plotting similar to Venn diagram. The base-based drawing system is complex and  
40  
41  
42 208 difficult to learn, while it is a good choice for complex graph drawing, such as the  
43  
44  
45 209 **circulize** (Gu et al., 2014) package (Code 2G), which draws chord diagrams composed  
46  
47  
48 210 of microbiota.

48 211 Additionally, there is often a lot of microbiome mapping work that involves a  
49  
50  
51 212 combination of graphics. At present, many tools in R can combine graphics, such as  
52  
53  
54 213 **cowplot**, **patchwork**, and **aplot**. The **patchwork** package has the most powerful  
55  
56  
57 214 functions and supports modular splicing graphics (Code 2H).

## 215 **Microbial community analysis**

1  
2  
3  
4 216 We have categorized the analysis of microbiome data into the following six major  
5  
6 217 types in Fig. 1D: diversity analysis, difference analysis, biomarkers identification,  
7  
8  
9 218 correlation and network analysis, functional prediction, and other microbiome analyses  
10  
11 219 (including source tracking analysis, community assembly processes, and analysis of  
12  
13  
14 220 associations between microbiota and environmental factors). Then, we would have  
15  
16  
17 221 organized, compared, and summarized all relevant R packages.

## 222 **Diversity analysis**

223 Microbial community diversity mainly includes alpha diversity (Richness,  
224 Shannon, Simpson, Chao1, ACE, etc.), rarefaction curve, beta diversity (ordination and  
225 clustering analysis), taxonomic or functional composition. Here must introduce the  
226 package **vegan** (Oksanen et al., 2007), an abbreviation for Vegetation Analysis, written  
227 by nine quantitative ecologists, including Oksanen from Finland, which is initially used  
228 for specific dealing with data on community ecology. The package provides a variety  
229 of methods for data standardization and transformation. For example, data used for  
230 alpha diversity analysis can be normalized at the same sequencing depth with *rrarefy()*,  
231 and data for ordination analysis can be normalized with the *decostant()* (Code 3A).  
232 After the sequencing data are sampling normalization, diversity calculation can be more  
233 reasonable. In addition, alpha diversity metrics calculation can also be carried out with  
234 the **ade4** (Dray and Dufour, 2007), **adespatial** (Dray et al., 2019), and **picante** packages  
235 (Kembel et al., 2010). For example, phylogenetic diversity can be calculated using the  
236 *pd()* in the **picante** package (Code 3A). **Vegan** not only allows for alpha diversity  
237 analysis, but also provides functions such as *rda()* for conducting principal components  
238  
239  
240  
241  
242  
243  
244  
245  
246  
247  
248  
249  
250  
251  
252  
253  
254  
255  
256  
257  
258  
259  
260

1  
2  
3  
4 238 analysis (PCA) and redundancy analysis (RDA), `cca()` for conducting correspondence  
5  
6 239 analysis (CA) and canonical correspondence analysis (CCA), `decorana()` for conducting  
7  
8  
9 240 decision curve analysis (DCA), and `metaMDS()` for conducting non-metric  
10  
11 241 multidimensional scaling (NMDS) for microbiome ordination analysis (Code 3B). The  
12  
13  
14 242 `prcom()` in **stats** package can be used for principal component analysis (PCA), which  
15  
16  
17 243 is a kind of dimension reduction analysis. The `mca()` provided by the **MASS** package  
18  
19 244 and the `MCA()` provided by the **FactoMineR** package can be used for multiple  
20  
21  
22 245 correspondence analysis (Code 3B); the **ape** package provides the `pcoa()` function for  
23  
24  
25 246 principal coordinate analysis (PCoA); the **MASS** package provides `lda()` for linear  
26  
27  
28 247 discriminant analysis (LDA, Code 3C). Before running many ordination operations, it  
29  
30 248 is often necessary for community clustering. The `vegdist()` in the **vegan** package can  
31  
32  
33 249 calculate euclidean, manhattan, bray, canberra, and other distances (Code 3B). In  
34  
35  
36 250 addition, distance calculation can also be done using `dist()` of **stats** package. The  
37  
38  
39 251 distance matrix can be used for clustering analysis in addition to ordination analysis.  
40  
41  
42 252 The `hclust()` in the **stats** package can be used for clustering analysis, a similar function  
43  
44  
45 253 can be achieved with the **factoextra**, **kmeans** packages (Code 3D). Microbial  
46  
47  
48 254 composition analysis mainly used to display the abundance of microbes, and the **dplyr**  
49  
50  
51 255 package is needed to organize the data then display with **ggplot2** subsequently.

## 256 **Difference analysis**

52  
53 257 Difference analysis is divided into community-level analysis and feature-level  
54  
55  
56 258 (any hierarchy of taxonomy and function) analysis. Community-level difference  
57  
58  
59 259 analysis is mainly performed with functions including `adonis()`, `anosim()`, and `mrpp()`  
60

1  
2  
3  
4 260 in **vegan** package, and *mantel.test()* in **ape** package (Code 4A). The R package for  
5  
6 261 compositional data difference analysis in the feature level can utilize the *wilcox.test()*  
7  
8  
9 262 (Code 4B) and *t.test()* (Code 4C) in the **stats** package. Subsequently, data correction  
10  
11 263 algorithms were developed specifically for sequencing data, such as the upper quartile  
12  
13  
14 264 (UQ), trimmed mean of M-values (TMM) (Code 4C), and relative log expression (RLE)  
15  
16  
17 265 harbored in the **edgeR** package (Chen et al., 2014) (Code 4D). Median of ratios method  
18  
19 266 (MED) in **DESeq2** package (Love et al., 2014) (Code 4E), and cumulative-sum scaling  
20  
21 267 (CSS) algorithm in **metagenomeSeq** (<https://github.com/sirusb/metagenomeSeq>)  
22  
23 268 package (Code 4F). Furthermore, the **ALDEx2** package provides polynomial models  
24  
25  
26 269 which can be used to infer feature abundance and calculate feature differences with  
27  
28  
29 270 non-parametric tests, t-tests, or generalized linear models (Code 4G). The **ANCOM-**  
30  
31  
32 271 **BC** package attempts to address sample heterogeneity by correcting bias with a log-  
33  
34  
35 272 linear model. In addition, other R packages for microbiome data correction and  
36  
37  
38 273 difference tests include **limma** (Smyth, 2005) (Code 4H), **DR**, **ANCOM** (Lin and  
39  
40  
41 274 Peddada, 2020) (Code 4I), **corncob** (Code 4J), **Maaslin2** (Code 4K), etc. Nearing et al.  
42  
43 275 (2022) showed that they compared these difference analysis methods and proposed that  
44  
45  
46 276 **ALDEx2** and **ANCOM-II** (`anchom_v2.1.R`, Code 4L) were the best performers in the  
47  
48  
49 277 difference analysis of microbial communities. As for the significance test, different  
50  
51 278 packages use different methods for significance testing. For example, Fisher test was  
52  
53  
54 279 used in **edgeR** package; Wald test was used in **DESeq2** and **corncob** package; t-test  
55  
56  
57 280 was used in **limma** package. There was other method for significance test, likes  
58  
59 281 Wilcoxon rank-sum test (**ALDEx2** and **ANCOM-II**), ANOVA (**Maaslin2**) etc.  
60

## 282 **Biomarker identification**

283 Characteristic **microbial consortia** were explored to explain certain questions, such  
284 as the biomarkers of the gut in obese or hypertensive populations, or of soil in Fusarium  
285 wilt develops, etc. Microbes selected through difference analysis are often unable to  
286 determine whether they represent the main differences of concern. Therefore, weight  
287 analysis or machine learning methods are used to further distinguish the feature  
288 microbes.

289 The main ones commonly used for weighted analysis are linear discriminant  
290 analysis effect size (LEfSe), PCA, etc (Code 5A). LEfSe is developed specifically for  
291 microbiome data, and the core functionality is implemented using the packages **LDA**  
292 (Fisher, 1936) and **MASS** (Ripley et al., 2013). By extracting the loading matrix of  
293 PCA ordination, the microbiome with the greatest impact on the sample variation are  
294 found as biomarkers. (Code 5B)

295 In terms of machine learning, the random forest model, which is widely used in  
296 microbiome analysis, is implemented by using the **randomforest** package (Liaw and  
297 Wiener, 2002) (Code 5C). There are many other decision tree-based machine learning  
298 models, such as the **mboost** (Hofner et al., 2014) package provides boosting-based  
299 algorithms, the **e1071** (Dimitriadou et al., 2008) package provides support vector  
300 machines *svm()* in Code 5D, and plain Bayes *naiveBayes()*. The **xgboost** package can  
301 integrate many tree models together to form a strong classifier, which can prevent  
302 overfitting via many strategies, including regularization terms, shrinkage, and column  
303 subsampling, etc. In addition, the **pROC** (Robin et al., 2011) package is used to plot  
304 the operating characteristic curve (ROC, Code 5D) to evaluate the efficiency of

1  
2  
3  
4 305 machine learning models. The **Caret** package provides cross-validation to determine  
5  
6 306 the number of features (Kuhn, 2009). Currently, Jakob et al (2021) developed an open-  
7  
8  
9 307 source R package **SIAMCAT**, a powerful yet user-friendly computational machine  
10  
11  
12 308 learning toolkit tailored to the characteristics of microbiome data.

### 13 14 309 **Correlation and network analysis**

15  
16  
17 310 Microbial co-occurrence network analysis is used to find **microbial modules** that  
18  
19  
20 311 may have mutualistic relationships. Co-occurrence network analysis mainly includes  
21  
22 312 the calculation of correlations, network visualization, and the calculation of network  
23  
24  
25 313 properties. The common R packages for calculation of correlations are **psych** (Revelle  
26  
27 314 and Revelle, 2015) (Code 6A), **WGCNA** (Langfelder and Horvath, 2008) (Code 6B),  
28  
29  
30 315 **Hmisc** (Harrell Jr and Harrell Jr, 2019) (Code 6C), and **SpiecEasi** (Kurtz et al., 2015)  
31  
32 316 (Code 6D). Among these R packages, **WGCNA** has the highest calculation speed,  
33  
34  
35 317 while requiring additional p-value correction; **psych** can calculate correlation with  
36  
37  
38 318 correct p-value, but the speed is very low; the **SpiecEasi** package can use the sparcc  
39  
40  
41 319 method to perform a more suitable method for microbiome data to calculate the  
42  
43  
44 320 correlation matrix, and can call multiple-threads to accelerate the calculation. R  
45  
46  
47 321 packages for network visualization and attribute calculation can use **igraph** (Code 6E),  
48  
49  
50 322 **network**, and **ggraph** packages (Code 6F). These R packages contain many layout  
51  
52  
53 323 algorithms for network visualization. In addition, **network** packages combined with  
54  
55  
56 324 **ggplot2** to visualize the network are easier to modify. **Sna** and **ggraph** packages have  
57  
58  
59 325 many visualization layout algorithms to increase the styles of network visualization.  
60  
326 With the increasing use of network analysis in the microbiome **analysis**, more attention



1  
2  
3  
4 327 is paid to network modularity and the key groups through network modules. The  
5  
6 328 **WGCNA** package provides a complete framework to quickly complete the correlation  
7  
8  
9 329 calculation, network module calculation, module feature vector calculation, and other  
10  
11 330 network properties exploration. The recent development of the **ggClusterNet** (Wen et  
12  
13 331 al., 2022) package (Code 6G) provides a unified framework for microbiome networks  
14  
15  
16 332 and designs a variety of unique module-based visualization algorithms to visualize the  
17  
18  
19 333 module relationships in the network.  
20

### 21 334 **Functional prediction**

22  
23 335 The **Tax4Fun** (Abhauer et al., 2015) R package (Code 7A) for functional  
24  
25 336 prediction of 16S rDNA has been developed to more accurately predict changes in  
26  
27 337 microbial community function using amplicon data. The package has been updated to  
28  
29 338 **Tax4Fun2** (Wemheuer et al., 2020). **Microeco** can implement FAPROTAX (Louca et  
30  
31 339 al., 2016) prediction for bacteria/archaea and FUNGuild (Nguyen et al., 2016)  
32  
33 340 prediction for fungi, which is based on the database of taxonomic functional description  
34  
35 341 from curated published papers. Functional prediction enables the prediction of  
36  
37 342 microbial community function and subsequent statistical analysis. Additionally, **vegan**  
38  
39 343 can be used for diversity analysis, while **edgeR**, **DEseq2**, and **limma** packages can be  
40  
41 344 used for difference analysis. For functional enrichment, the **clusterProfiler** (Code 7B)  
42  
43 345 package can perform GO, KEGG, GSEA and GSVA enrichment, which considers  
44  
45 346 gene/pathway abundance and is recommended. Furthermore, the **clusterProfiler**  
46  
47 347 package provides plot functions based on the **ggplot** syntax, allowing to plot appealing  
48  
49 348 graphics in a simple manner. Gene/pathway network analysis can be performed using  
50  
51 349 **WGCNA** for calculation, and **ggClusterNet** for network parameter calculation and  
52  
53  
54  
55  
56  
57  
58  
59  
60

1  
2  
3  
4 350 visualization. However, the reliability of functional prediction results, particularly for  
5  
6 351 environmental samples, is currently disputed (Wemheuer et al., 2020), and therefore,  
7  
8  
9 352 further verification of analysis results is often required.

### 11 353 **Other microbiome analysis**

12  
13 354 Analysis for microbial community formation process commonly used in the  
14  
15 355 framework proposed by Stegen et al. (2013) to calculate  $\beta$ NTI and RC-Bray indices  
16  
17 356 with R packages **minpack.lm**, **picante**, **Hmisc**, **eulerr**, **FSA**, **ape**, **stats4**, and others  
18  
19 357 (Code 8A). Ning et al. (2020) used a phylogenetic binning-based null model analysis  
20  
21 358 to infer quantitative mechanisms underlying community assembly, and developed the  
22  
23 359 R package **iCAMP** (Code 8B). It allows for the quantitative assessment of the relative  
24  
25 360 importance of different ecological processes (e.g., homogenizing selection,  
26  
27 361 heterogenizing selection, dispersal, and drift) on both the entire community and each  
28  
29 362 phylogenetic bin (which is usually composed of taxa from a single family or order with  
30  
31 363 distinct ecological characteristics). In addition, the package also provides neutral theory  
32  
33 364 models, phylogenetic and taxonomic null model analyses at both the community and  
34  
35 365 clade levels, calculation of niche differences and phylogenetic distances between clades,  
36  
37 366 and tests for phylogenetic signals within individual phylogenetic bins.

38  
39 367 Microbial communities were often used to analyze the correlation with  
40  
41 368 environment indicators, for example, *mantel.test()* provided by the **vegan** package was  
42  
43 369 used to examine the correlation between microbial communities and environment  
44  
45 370 indicators, and using *wascores()*, *mantel.correlog()* to detect the phylogenetic signal  
46  
47 371 between microbial communities and environmental factors (Code 8C). In addition, the  
48  
49 372 **ggClusterNet** package can be used to calculate the co-occurrence relationships

1  
2  
3  
4 373 between microbes/microbiome and environmental factors, and generated publish-ready  
5  
6 374 figures (Code 8D).

7  
8  
9 375 Knights et al. (2011) proposed the microbiome traceability tool source tracker in  
10  
11 376 R language. Metcalf et al. (2016) predicted the time of death and tracked the source  
12  
13 377 microbes of real cadavers on microbial communities, then microbial traceability  
14  
15 378 analysis gradually popular. Shenhav et al. (2019) proposed a new algorithm in R,  
16  
17 379 **FEAST** (Code 8E), which makes microbial traceability analysis more efficient, faster,  
18  
19 380 and with low false positives.

## 20 381 **Integrated R packages for microbiome**

21  
22 382 As microbiome sequencing becomes more popular, R packages dedicated to  
23  
24 383 microbiome data processing are gradually emerging (Fig. 2). McMurdie and Holmes  
25  
26 384 (2013) developed the **phyloseq** package: a comprehensive tool for microbiome data  
27  
28 385 (including feature tables, phylogenetic trees, and feature annotation) clustering,  
29  
30 386 integrating data import, storage, analysis, and output. The package utilizes many tools  
31  
32 387 in R for ecological and phylogenetic analyses (**vegan**, **ade4**, **ape**, and **picante**) and uses  
33  
34 388 **ggplot2** to output high-standard figures. The data storage structure uses a S4-like  
35  
36 389 storage system to store all relevant data as a single experiment-level object, thus making  
37  
38 390 it easier to share data and reproduce the analysis. Subsequently, the packages  
39  
40 391 **microbiome** (<https://github.com/microbiome/microbiome>), the  
41  
42 392 **MicrobiomeAnalystR**(Chong et al., 2020), **microViz** (Barnett et al., 2021), and  
43  
44 393 **microbiomeSeq** emerged under this framework. Subsequently, the **microeco** package  
45  
46 394 according to the S6 framework, which provides more analysis functions. With the need  
47  
48  
49  
50  
51  
52  
53  
54  
55  
56  
57  
58  
59  
60

1  
2  
3  
4 395 for data interactive analysis, **Animalcules** (Zhao et al., 2021) emerged. **EasyMicroPlot**  
5  
6 396 (<https://github.com/xielab2017/EasyMicroPlot>) also uses an interactive interface for  
7  
8  
9 397 microbiome data exploration, allowing for rapid downstream analysis of the  
10  
11  
12 398 microbiome (Fig. 3; Table1).

### 14 399 **Microbiome data analysis using phyloseq**

17 400 **Phyloseq**, using the S4 class object, is more suitable for object-oriented  
18  
19 401 programming and has had a great impact on microbiome data analysis (Figs. 2/3, Fig.  
20  
21  
22 402 S2A-I, Pipeline 1. `phyloseq.Rmd`). Through the S4 class object, **phyloseq** allows the  
23  
24 403 five parts of data (the feature table, feature annotation, metadata, representative  
25  
26 404 sequences, and evolutionary tree) to maintain correspondence under the same  
27  
28  
29 405 framework, and provides a variety of multiple filtering functions on microbial features  
30  
31  
32 406 and samples, allowing the five parts of data to be filtered consistently without  
33  
34  
35 407 considering different among data. It also provides microbiome analysis through  
36  
37 408 microbial data filtering and normalization, diversity calculation (Fig. S2A-B),  
38  
39 409 microbial composition visualization (Fig. S2C-D), evolutionary tree visualization, and  
40  
41  
42 410 network analysis (Fig. S2E). The beta diversity function provides more than 30 distance  
43  
44  
45 411 algorithms, far more than those provided by packages such as **vegan**. Secondly, the  
46  
47  
48 412 **phyloseq** package uses **ggplot** for graphical visualization (Fig. S2F), which is easier to  
49  
50  
51 413 generate and modify figures. Additionally, **phyloseq** can integrate the evolutionary tree  
52  
53 414 and feature taxonomic and abundance on tree branches and leaves (Fig. S2G), which  
54  
55  
56 415 makes the tree informative and beautiful.

### 58 416 **Microbiome data analysis using microbiome**

1  
2  
3  
4 417 The **microbiome** package also uses S4 class objects, like **phyloseq**, and can also  
5  
6 418 perform most of the analysis of microbiomes (Figs. 2/3, Fig. S3, Pipeline 2.  
7  
8  
9 419 Microbiome.Rmd). Compared with **phyloseq**, the **microbiome** package is richer in  
10  
11 420 alpha diversity indicators, which provides more than 30 alpha diversity indicators.  
12  
13  
14 421 Secondly, it provides core microbial calculation and visualization functions. In general,  
15  
16  
17 422 it can be used as a complement to **phyloseq** or in conjunction with it.

### 423 **Microbiome data analysis using MicrobiomeAnalystR**

424 **MicrobiomeAnalystR** is an R package version according to the  
425 MicrobiomeAnalyst webserver (Figs. 2/3, Fig. S4A-I, Pipeline 3.  
426 MicrobiomeAnalystR.Rmd). These functions include diversity (Fig. S4A-E),  
427 difference (Fig. S4F), the evolutionary tree, LEfSe, machine learning (Fig. S4G-H),  
428 network analysis, etc., which are more powerful than the previous two packages. The  
429 visualization combines basic packages, **ggplot** plotting, and interactive plotting. In  
430 terms of network analysis, it provides the process of calculating and plotting SparCC  
431 networks that are more suitable for microbiome data. However, the package depends  
432 on many R packages from CRAN, Bioconductor, and GitHub, so a complete installation  
433 of **MicrobiomeAnalystR** requires a lot of effort.

### 434 **Microbiome data analysis using Animalcules**

435 The **Animalcules** package is an alternative way to analysis in an interactive  
436 platform (Figs. 2/3, Fig.S5A-I, Pipeline 4. Animalcules.Rmd). It is possible to calculate  
437 and plot sequence statistics (Fig. S5A) and output interactive pie charts (Fig. S5B),  
438 calculate, and visualize alpha diversity boxplot, group microbial taxonomic or

1  
2  
3  
4 439 functional composition stacked histogram plotting (Fig. S5C-G), ordination analysis  
5  
6 440 (Fig. S5H), cluster analysis and heatmap, difference analysis by **DESeq2**, **limma**, using  
7  
8  
9 441 randomforest, logistic regression to select biomarkers, and other analyses (Fig. S5J).  
10  
11 442 The results of these analyses can often be reanalyzed by interactively modifying  
12  
13 443 parameters, and the images can be interactively zoomed in and out, clicked to see details,  
14  
15 444 and other operations performed by the mouse for better pattern discovery. However,  
16  
17 445 the results cannot be exported as vector format, which do not meet the requirements for  
18  
19 446 publication. Secondly, the analysis content is too little, especially the microbiome  
20  
21 447 network analysis, the correlation analysis between the microbiome and other indicators.

#### 22 448 **Microbiome data analysis using microeco**

23  
24  
25  
26  
27 449 The **microeco** package is very powerful, using R6 class data structure (Figs. 2/3,  
28  
29 450 Fig.S6A-I, Pipeline 5. `microeco.Rmd`). It includes microbial diversity (Fig. S6A-G),  
30  
31 451 difference (Fig. S6H-I), network (Fig. S6J), biomarker (Fig. S6K), integrated microbial  
32  
33 452 and environmental factor (Fig. S6L), and phylogenetic diversity analysis. It can  
34  
35 453 complete almost all the current microbiome analysis contents. However, it is not  
36  
37 454 suitable for novices because there is a certain threshold for using S6 class objects. In  
38  
39 455 addition, due to too many functions, the requirements for input data are different,  
40  
41 456 causing some functions are hard to use.

#### 42 457 **Microbiome data analysis using amplicon**

43  
44  
45 458 The package **amplicon** is an analysis and plotting tool within the microbiome  
46  
47 459 analysis toolkit EasyMicrobiome (Liu et al., 2023). It enables various diversity analyses,  
48  
49 460 including alpha diversity, rarefaction curve, PCoA, NMDS, LDA and PCA, taxonomic  
50  
51  
52  
53  
54  
55  
56  
57  
58  
59  
60

1  
2  
3  
4 461 composition. Then, it can easily generate high-quality figures such as boxplots, scatter  
5  
6 462 plots for diversity analysis, stacked bar plots, circlize plots, and map trees for taxonomic  
7  
8  
9 463 or functional composition (Figs. 2/3, Fig.S7A-I, Pipeline 6. Amplicon.Rmd). One of its  
10  
11 464 notable features is its ability to finely adjust the presentation of figures, resulting in  
12  
13  
14 465 published-ready figures. Additionally, several tools within the amplicon package are  
15  
16 466 available for microbiome data transformation, facilitating subsequent analysis using  
17  
18  
19 467 tools such as LEfSe and STAMP. However, at the current version, the amplicon  
20  
21  
22 468 package does not provide some functions for network analysis, analysis of microbiome-  
23  
24  
25 469 environment interactions, and analysis of community formation processes. The authors  
26  
27 470 provide some scripts in EasyAmplicon pipeline to do this, mentioned in the published  
28  
29  
30 471 paper plan to finish these functions in the future.

## 32 472 **The best practice for microbiome data analysis in R**

33  
34  
35 473 The abundance of R packages can hinder microbiome researchers from efficiently  
36  
37 474 selecting appropriate R packages for microbiome-related analyses. Therefore, we  
38  
39  
40 475 organized and selected efficient, commonly used, and user-friendly functions for  
41  
42  
43 476 microbiome data analysis in six categories (Fig. S8): 1) diversity analysis (Figs. S9A-I;  
44  
45 477 Figs.S10A-E), 2) difference analysis (Figs. S10F-I; Figs. S11A-B), 3) biomarker  
46  
47  
48 478 identification (Figs. S11C-D), 4) correlation and network analysis (Figs. S11E-I), 5)  
49  
50  
51 479 functional prediction, 6 other microbiome analyses (Figs.S12A-I). All the script can be  
52  
53  
54 480 found in the file Pipeline.BestPractice.Rmd. This led to develop a better microbiome  
55  
56 481 data analysis pipeline.

57  
58 482 In this pipeline, we used the **amplicon** package for alpha diversity rarefaction  
59  
60

1  
2  
3  
4 483 curve (Fig. 4A; Fig. S9A) and PCoA analysis (Fig. 4B; Fig. S9B), **ggplot2** package for  
5  
6 484 visualization of microbial community composition, **ggClusterNet** for constructing  
7  
8  
9 485 Venn network (Fig. 4C), **ggtree** and **ggtrextre** for building evolutionary trees (Fig. 4D),  
10  
11 486 and LEfSe for generating cladograms (Fig. 4E). We employed the **stst4**, **ggplot2**, and  
12  
13  
14 487 **cowplot** packages for difference analysis and generated STAMP plots (Fig. 4F), used  
15  
16  
17 488 **edgeR** for difference analysis and visualized in Manhattan plots (Fig. 4G), and applied  
18  
19  
20 489 **DESeq2** for difference analysis and generated multi-group volcano plots (Fig. 4H). We  
21  
22 490 also used the **el071**, **caret**, **randomforest**, **ROC** packages for various machine learning  
23  
24  
25 491 analyses and generated microbiome weighted plots (Fig. 4I). Furthermore, we used  
26  
27  
28 492 **ggClusterNet** for microbiome network analysis (Fig. 4J), constructed network graphs  
29  
30  
31 493 and combined plots to explore the associations between environmental factors and  
32  
33 494 microbiome communities (Fig. 4K). Finally, we used the **FEAST** package to perform  
34  
35  
36 495 community source tracking analysis and constructed pie charts (Fig. 4L). Other  
37  
38  
39 496 analyses included stacked bar charts of microbial community composition (Figs.  
40  
41 497 S9E/H), chord diagrams (Fig. S10A), Venn diagrams (Fig. S10C), Upset diagrams (Fig.  
42  
43 498 S10D), difference analysis volcano plots (Fig. S10E), functional prediction etc.

## 499 **Perspective and conclusions**

500 In the past ten years, the R language and numerous R packages have played an  
501 important role in the microbiome data analysis. R language is easy to use and get started.  
502 It has attracted many researchers to learn about it. However, there are still some  
503 contradictions between supply and demand in the microbiome data analysis. For  
504 example, it is often difficult to support multi-threading under the Windows system;



1  
2  
3  
4 505 secondly, the speed of many R packages running is relatively slow, although some R  
5  
6 506 packages are written in other languages as supplements; third, the application in  
7  
8  
9 507 microbiome still needs further development. For instance, there is a shortage of  
10  
11 508 packages that allow for the exploration of time-series-based microbial compositions, as  
12  
13  
14 509 well as more robust interactive packages for analyzing complex microbial data.  
15  
16  
17 510 Furthermore, **ggplot2** lacks the capability to create complex and combined figures,  
18  
19 511 which fails to meet the visualization requirements for relationships between multiple  
20  
21 512 intricate indicators with microbial community data. Therefore, developing new R  
22  
23 513 packages that are more suitable for drawing complex figures and composite figures  
24  
25  
26 514 would be necessary for microbiome data.

27  
28  
29  
30 515 With the development of sequencing technology, data analysis methods have  
31  
32 516 advanced along with the development of R packages contributed to the field of  
33  
34 517 microbiome. These R packages range from classic R packages such as **vegan**, which  
35  
36 518 has been cited more than 10,000 times, to integrated R packages such as **phyloseq**,  
37  
38 519 which contain many functions in one package and set a unified data processing  
39  
40  
41 520 framework. These R packages have been able to implement most of the functions of  
42  
43 521 microbiome analysis, from microbial diversity, difference, biomarker identification,  
44  
45 522 correlation and network, phylogenetic analysis, etc. However, these R packages have  
46  
47 523 some redundant functions; for example, **phyloseq**, **microbiome**, and others can do  
48  
49 524 microbial diversity analysis. The difference is only in the visualization method and  
50  
51 525 scheme. A similar situation has always existed in microbiome analysis R packages, so  
52  
53 526 we hope that in future developments we will try to de-redundantly use the same part of  
54  
55  
56  
57  
58  
59  
60

1  
2  
3  
4 527 the content or similar content to highlight the advantages of R packages.  
5

6 528 Although these R packages can conduct a lot of functions, they don't do well  
7  
8  
9 529 enough in some specific analyses, for example, alpha and beta diversity analysis, and  
10  
11 530 the outgoing graphs often do not add difference detection results to visualize the  
12  
13  
14 531 differences from the figures. In addition, there are still some contents that can continue  
15  
16  
17 532 to be developed, such as applying more machine learning methods to microbiome data  
18  
19  
20 533 and its learning method, model, and important variable evaluation. Secondly,  
21  
22 534 metagenomes are becoming more widely used, and the support of species and  
23  
24  
25 535 functional annotation results based on Kraken (Wood and Salzberg, 2014), MEGAN  
26  
27 536 (Huson et al., 2007), MetaPhlan2 (Truong et al., 2015), HUMAnN2 (Franzosa et al.,  
28  
29  
30 537 2018), eggNOG-mapper (Huerta-Cepas et al., 2017), etc. is becoming more and more  
31  
32  
33 538 important, and these make the data processed by R rise from megabyte (M) to gigabyte  
34  
35  
36 539 (G). Therefore, [Faster data processing R packages should be used to the microbiome](#)  
37  
38 540 [data analysis process, such as `data.table`, `fst`, `tidyfst` etc.](#)  
39

40 541 The use of appropriate data structures can accelerate the microbiome data  
41  
42  
43 542 processing process. At first, we used S4 class objects for microbiome data  
44  
45  
46 543 encapsulation, which can complete a variety of analyses comprehensively and  
47  
48  
49 544 efficiently. The emergence of S6 class objects and other objects has greatly impacted  
50  
51  
52 545 microbiome data processing and largely facilitates it. With the development of the tidy  
53  
54  
55 546 family of R languages, tidy-based data structures have recently emerged for  
56  
57  
58 547 microbiome data mining. For example, the **MicrobiotaProcess** package (Xu et al.,  
59  
60 548 2023). This structure is more suitable for microbiome data mining, machine learning

1  
2  
3  
4 549 modeling, and other analyses, which can more easily extract the influence of  
5  
6 550 experimental design, time, space, and other factors on microbiome data in analysis, to  
7  
8  
9 551 discover the deep-seated patterns. We expect the R language to make microbiome  
10  
11 552 analysis more efficient and help everyone discover more about its role in humans,  
12  
13  
14 553 animals, plants, and the environment, and use it for our benefit to make the world a  
15  
16  
17 554 better place.  
18

19  
20 555

## 21 22 556 **Supplementary information**

23  
24 557 The online version contains supplementary figure 1-12 available at  
25  
26  
27 558 <https://doi.org/10.1093/xxx>.

## 28 29 30 559 **Declarations**

31  
32 560 The authors declare no competing interests related to the content of this paper.

## 33 34 35 561 **Author contributions**

36  
37 562 TW, G.N, J.Y and Y.L: conceived the study, and wrote the paper; JY and Y.L,  
38  
39  
40 563 conceived the study, and supervised the study; Y.L T.C and Q.S: provided critical  
41  
42  
43 564 comments on the study, and helped write the paper.

## 44 45 565 **Acknowledgments**

46  
47  
48 566 We thank all the people start and fork this project in GitHub and feedback the  
49  
50  
51 567 useful comments for the scripts.

## 52 53 568 **Abbreviations**

54  
55  
56 569 PCA, principal components analysis; NMDS, non-metric multidimensional scaling;  
57  
58  
59 570 DCA, decision curve analysis; CCA, canonical correspondence analysis; LDA, linear  
60

1  
2  
3  
4 571 discriminant analysis; TMM, trimmed mean of M-values; RLE, relative log expression;  
5  
6 572 UQ, upper quartile; MED, Median of ratios method; CSS, cumulative-sum scaling.  
7  
8

## 9 573 **Funding**

10  
11 574 This study was financially supported by the Natural Science Foundation of China  
12  
13 575 (42277297, 42090060), Jiangsu Funding Program for Excellent Postdoctoral Talent  
14  
15 576 (2022ZB325), Scientific and technology innovation project of China Academy of  
16  
17 577 Chinese Medical Sciences (C12021A04115), the Fundamental Research Funds for the  
18  
19 578 Central public welfare research institutes (ZZ13-YQ-095).  
20  
21  
22  
23

## 24 579 **Data availability**

25  
26  
27 580 No new sequencing data generated by this project. All the demo data and scripts are  
28  
29 581 available in GitHub: <https://github.com/taowenmicro/EasyMicrobiomeR>.  
30  
31

## 32 582 **References**

33  
34  
35 583 Amir, A., McDonald, D., Navas-Molina, J.A., Kopylova, E., Morton, J.T., Zech Xu, Z., Kightley,  
36  
37 584 E.P., Thompson, L.R., Hyde, E.R., and Gonzalez, A. (2017). Deblur rapidly resolves single-  
38  
39 585 nucleotide community sequence patterns. *MSystems* 2, e00191-00116.  
40  
41  
42 586 Aßhauer, K.P., Wemheuer, B., Daniel, R., and Meinicke, P. (2015). Tax4Fun: predicting  
43  
44 587 functional profiles from metagenomic 16S rRNA data. *Bioinformatics* 31, 2882-2884.  
45  
46  
47 588 Barnett, D.J., Arts, I.C., and Penders, J. (2021). microViz: an R package for microbiome data  
48  
49 589 visualization and statistics. *Journal of Open Source Software* 6, 3201.  
50  
51  
52 590 Bolyen, E., Rideout, J.R., Dillon, M.R., Bokulich, N.A., Abnet, C.C., Al-Ghalith, G.A., Alexander,  
53  
54 591 H., Alm, E.J., Arumugam, M., and Asnicar, F. (2019). Reproducible, interactive, scalable and  
55  
56 592 extensible microbiome data science using QIIME 2. *Nature biotechnology* 37, 852-857.  
57  
58  
59  
60

- 1  
2  
3  
4 593 Callahan, B.J., McMurdie, P.J., Rosen, M.J., Han, A.W., Johnson, A.J.A., and Holmes, S.P.  
5  
6 594 (2016). DADA2: High-resolution sample inference from Illumina amplicon data. *Nature methods*  
7  
8  
9 595 13, 581-583.  
10  
11 596 Caporaso, J.G., Kuczynski, J., Stombaugh, J., Bittinger, K., Bushman, F.D., Costello, E.K.,  
12  
13 597 Fierer, N., Peña, A.G., Goodrich, J.K., and Gordon, J.I. (2010). QIIME allows analysis of high-  
14  
15 598 throughput community sequencing data. *Nature methods* 7, 335-336.  
16  
17  
18 599 Carrión, V.J., Perez-Jaramillo, J., Cordovez, V., Tracanna, V., De Hollander, M., Ruiz-Buck, D.,  
20  
21 600 Mendes, L.W., van Ijcken, W.F., Gomez-Exposito, R., and Elsayed, S.S. (2019). Pathogen-  
22  
23 601 induced activation of disease-suppressive functions in the endophytic root microbiome. *Science*  
24  
25 602 366, 606-612.  
26  
27  
28 603 Chen, H., and Boutros, P.C. (2011). VennDiagram: a package for the generation of highly-  
29  
30 604 customizable Venn and Euler diagrams in R. *BMC bioinformatics* 12, 1-7.  
31  
32  
33 605 Chen, Y., Li, J., Zhang, Y., Zhang, M., Sun, Z., Jing, G., Huang, S., and Su, X. (2022). Parallel-  
34  
35 606 Meta Suite: Interactive and rapid microbiome data analysis on multiple platforms. *IMeta* 1, e1.  
36  
37  
38 607 Chen, Y., McCarthy, D., Robinson, M., and Smyth, G.K. (2014). edgeR: differential expression  
39  
40 608 analysis of digital gene expression data User's Guide. *Bioconductor User's Guide*.  
41  
42  
43 609 Chong, J., Liu, P., Zhou, G., and Xia, J. (2020). Using MicrobiomeAnalyst for comprehensive  
44  
45 610 statistical, functional, and meta-analysis of microbiome data. *Nature Protocols* 15, 799-821.  
46  
47  
48 611 Conway, J.R., Lex, A., and Gehlenborg, N. (2017). UpSetR: an R package for the visualization  
49  
50 612 of intersecting sets and their properties. *Bioinformatics*.  
51  
52  
53 613 Dimitriadou, E., Hornik, K., Leisch, F., Meyer, D., and Weingessel, A. (2008). Misc functions of  
54  
55 614 the Department of Statistics (e1071), TU Wien. *R package* 1, 5-24.  
56  
57  
58  
59  
60

- 1  
2  
3  
4 615 Dray, S., Bauman, D., Blanchet, G., Borcard, D., Clappe, S., Guenard, G., Jombart, T.,  
5  
6 616 Larocque, G., Legendre, P., and Madi, N. (2019). adespatial: Multivariate multiscale spatial  
7  
8  
9 617 analysis. R package version 0.3-7. Ecological Monographs 82.  
10  
11  
12 618 Dray, S., and Dufour, A.-B. (2007). The ade4 package: implementing the duality diagram for  
13  
14 619 ecologists. Journal of statistical software 22, 1-20.  
15  
16  
17 620 Edgar, R.C. (2010). Search and clustering orders of magnitude faster than BLAST.  
18  
19 621 Bioinformatics 26, 2460-2461.  
20  
21  
22 622 Edgar, R.C. (2016). UNOISE2: improved error-correction for Illumina 16S and ITS amplicon  
23  
24 623 sequencing. BioRxiv, 081257.  
25  
26  
27 624 Fisher, R.A. (1936). The use of multiple measurements in taxonomic problems. Annals of  
28  
29 625 eugenics 7, 179-188.  
30  
31  
32 626 Franzosa, E.A., Mclver, L.J., Rahnvard, G., Thompson, L.R., Schirmer, M., Weingart, G.,  
33  
34 627 Lipson, K.S., Knight, R., Caporaso, J.G., and Segata, N. (2018). Species-level functional  
35  
36 628 profiling of metagenomes and metatranscriptomes. Nature methods 15, 962-968.  
37  
38  
39 629 Gu, Z. (2022). Complex heatmap visualization. iMeta 1, e43.  
40  
41  
42 630 Gu, Z., Gu, L., Eils, R., Schlesner, M., and Brors, B. (2014). circlize implements and enhances  
43  
44 631 circular visualization in R. Bioinformatics 30, 2811-2812.  
45  
46  
47 632 Hamilton, N.E., and Ferry, M. (2018). ggtern: Ternary diagrams using ggplot2. Journal of  
48  
49 633 Statistical Software 87, 1-17.  
50  
51  
52 634 Harrell Jr, F.E., and Harrell Jr, M.F.E. (2019). Package 'hmisc'. CRAN2018 2019, 235-236.  
53  
54  
55 635 Hofner, B., Mayr, A., Robinzonov, N., and Schmid, M. (2014). Model-based boosting in R: a  
56  
57 636 hands-on tutorial using the R package mboost. Computational statistics 29, 3-35.  
58  
59  
60

- 1  
2  
3  
4 637 Huerta-Cepas, J., Forslund, K., Coelho, L.P., Szklarczyk, D., Jensen, L.J., Von Mering, C., and  
5  
6 638 Bork, P. (2017). Fast genome-wide functional annotation through orthology assignment by  
7  
8  
9 639 eggNOG-mapper. *Molecular biology evolution* 34, 2115-2122.  
10  
11 640 Huson, D.H., Auch, A.F., Qi, J., and Schuster, S.C. (2007). MEGAN analysis of metagenomic  
12  
13 641 data. *Genome research* 17, 377-386.  
14  
15  
16 642 Ihaka, R., and Gentleman, R. (1996). R: a language for data analysis and graphics. *Journal of*  
17  
18  
19 643 *computational graphical statistics*  
20  
21  
22 644 5, 299-314.  
23  
24 645 Kembel, S.W., Cowan, P.D., Helmus, M.R., Cornwell, W.K., Morlon, H., Ackerly, D.D.,  
25  
26  
27 646 Blomberg, S.P., and Webb, C.O. (2010). Picante: R tools for integrating phylogenies and  
28  
29  
30 647 ecology. *Bioinformatics* 26, 1463-1464.  
31  
32  
33 648 Knights, D., Kuczynski, J., Charlson, E.S., Zaneveld, J., Mozer, M.C., Collman, R.G., Bushman,  
34  
35 649 F.D., Knight, R., and Kelley, S.T. (2011). Bayesian community-wide culture-independent  
36  
37  
38 650 microbial source tracking. *Nature methods* 8, 761-763.  
39  
40  
41 651 Kolde, R. (2012). Pheatmap: pretty heatmaps. R package version 1, 726.  
42  
43 652 Kuhn, M. (2009). The caret package. *Journal of Statistical Software* 28.  
44  
45 653 Kurtz, Z.D., Müller, C.L., Miraldi, E.R., Littman, D.R., Blaser, M.J., and Bonneau, R.A. (2015).  
46  
47  
48 654 Sparse and compositionally robust inference of microbial ecological networks. *PLoS*  
49  
50  
51 655 *computational biology* 11, e1004226.  
52  
53 656 Langfelder, P., and Horvath, S. (2008). WGCNA: an R package for weighted correlation  
54  
55  
56 657 network analysis. *BMC Bioinformatics* 9, 1-13.  
57  
58  
59 658 Liaw, A., and Wiener, M. (2002). Classification and regression by randomForest. *R news* 2,  
60

- 1  
2  
3  
4 659 18-22.  
5  
6  
7 660 Lin, H., and Peddada, S.D. (2020). Analysis of microbial compositions: a review of  
8  
9 661 normalization and differential abundance analysis. *NPJ biofilms and microbiomes* 6, 1-13.  
10  
11  
12 662 Liu, C., Cui, Y., Li, X., and Yao, M. (2021a). *microeco*: an R package for data mining in microbial  
13  
14 663 community ecology. *FEMS microbiology ecology* 97, fiae255.  
15  
16  
17 664 Liu, Y., Qin, Y., Chen, T., Lu, M., Qian, X., Guo, X., and Bai, Y. (2021b). A practical guide to  
18  
19 665 amplicon and metagenomic analysis of microbiome data. *Protein & cell* 12, 315-330.  
20  
21  
22 666 Liu, Y.X., Chen, L., Ma, T., Li, X., Zheng, M., Zhou, X., Chen, L., Qian, X., Xi, J., and Lu, H.  
23  
24 667 (2023). EasyAmplicon: An easy-to-use, open-source, reproducible, and community-based  
25  
26 668 pipeline for amplicon data analysis in microbiome research. *iMeta*, e83.  
27  
28  
29  
30 669 Louca, S., Parfrey, L.W., and Doebeli, M. (2016). Decoupling function and taxonomy in the  
31  
32 670 global ocean microbiome. *Science* 353, 1272-1277.  
33  
34  
35 671 Love, M.I., Huber, W., and Anders, S. (2014). Moderated estimation of fold change and  
36  
37 672 dispersion for RNA-seq data with DESeq2. *Genome biology* 15, 1-21.  
38  
39  
40 673 McMurdie, P.J., and Holmes, S. (2013). *phyloseq*: an R package for reproducible interactive  
41  
42 674 analysis and graphics of microbiome census data. *PloS one* 8, e61217.  
43  
44  
45 675 Metcalf, J.L., Xu, Z.Z., Weiss, S., Lax, S., Van Treuren, W., Hyde, E.R., Song, S.J., Amir, A.,  
46  
47 676 Larsen, P., and Sangwan, N. (2016). Microbial community assembly and metabolic function  
48  
49 677 during mammalian corpse decomposition. *Science* 351, 158-162.  
50  
51  
52  
53 678 Nearing, J.T., Douglas, G.M., Hayes, M.G., MacDonald, J., Desai, D.K., Allward, N., Jones,  
54  
55 679 C.M.A., Wright, R.J., Dhanani, A.S., Comeau, A.M., *et al.* (2022). Microbiome differential  
56  
57 680 abundance methods produce different results across 38 datasets. *Nature Communications* 13,  
58  
59  
60



1  
2  
3  
4 681 342.  
5  
6  
7 682 Nguyen, N.H., Song, Z., Bates, S.T., Branco, S., Tedersoo, L., Menke, J., Schilling, J.S., and  
8  
9 683 Kennedy, P.G. (2016). FUNGuild: an open annotation tool for parsing fungal community  
10  
11 684 datasets by ecological guild. *Fungal Ecology* 20, 241-248.  
12  
13  
14 685 Ning, D., Yuan, M., Wu, L., Zhang, Y., Guo, X., Zhou, X., Yang, Y., Arkin, A.P., Firestone, M.K.,  
15  
16  
17 686 and Zhou, J. (2020). A quantitative framework reveals ecological drivers of grassland microbial  
18  
19 687 community assembly in response to warming. *Nature communications* 11, 4717.  
20  
21  
22 688 Oksanen, J., Kindt, R., Legendre, P., O'Hara, B., Stevens, M.H.H., Oksanen, M.J., and  
23  
24 689 Suggests, M. (2007). The vegan package. *Community ecology package* 10, 719.  
25  
26  
27 690 Pages, H., Aboyou, P., Gentleman, R., and DebRoy, S. (2016). Biostrings: String objects  
28  
29 691 representing biological sequences, and matching algorithms. R package version 2, 10.18129.  
30  
31  
32 692 Paoli, L., Ruscheweyh, H.-J., Forneris, C.C., Hubrich, F., Kautsar, S., Bhushan, A., Lotti, A.,  
33  
34  
35 693 Clayssen, Q., Salazar, G., Milanese, A., *et al.* (2022). Biosynthetic potential of the global ocean  
36  
37 694 microbiome. *Nature* 607, 111-118.  
38  
39  
40 695 Pasoli, E., Schiffer, L., Manghi, P., Renson, A., Obenchain, V., Truong, D.T., Beghini, F., Malik,  
41  
42  
43 696 F., Ramos, M., Dowd, J.B., *et al.* (2017). Accessible, curated metagenomic data through  
44  
45 697 ExperimentHub. *Nature Methods* 14, 1023-1024.  
46  
47  
48 698 Proctor, L.M., Creasy, H.H., Fettweis, J.M., Lloyd-Price, J., Mahurkar, A., Zhou, W., Buck, G.A.,  
49  
50  
51 699 Snyder, M.P., Strauss, J.F., Weinstock, G.M., *et al.* (2019). The Integrative Human Microbiome  
52  
53 700 Project. *Nature* 569, 641-648.  
54  
55  
56 701 Revelle, W., and Revelle, M.W. (2015). Package 'psych'. The comprehensive R archive  
57  
58 702 network 337, 338.  
59  
60

- 1  
2  
3  
4 703 Ripley, B., Venables, B., Bates, D.M., Hornik, K., Gebhardt, A., Firth, D., and Ripley, M.B.  
5  
6 704 (2013). Package 'mass'. Cran r 538, 113-120.  
7  
8  
9 705 Robin, X., Turck, N., Hainard, A., Tiberti, N., Lisacek, F., Sanchez, J.-C., and Müller, M. (2011).  
10  
11 706 pROC: an open-source package for R and S+ to analyze and compare ROC curves. BMC  
12  
13 707 bioinformatics 12, 1-8.  
14  
15  
16 708 Rognes, T., Flouri, T., Nichols, B., Quince, C., and Mahé, F. (2016). VSEARCH: a versatile  
17  
18 709 open source tool for metagenomics. PeerJ 4, e2584.  
19  
20  
21 710 Schloss, P.D., Westcott, S.L., Ryabin, T., Hall, J.R., Hartmann, M., Hollister, E.B., Lesniewski,  
22  
23 711 R.A., Oakley, B.B., Parks, D.H., and Robinson, C.J. (2009). Introducing mothur: open-source,  
24  
25 712 platform-independent, community-supported software for describing and comparing microbial  
26  
27 713 communities. Applied and environmental microbiology 75, 7537-7541.  
28  
29  
30 714 Shenhav, L., Thompson, M., Joseph, T.A., Briscoe, L., Furman, O., Bogumil, D., Mizrahi, I.,  
31  
32 715 Pe'er, I., and Halperin, E. (2019). FEAST: fast expectation-maximization for microbial source  
33  
34 716 tracking. Nature methods 16, 627-632.  
35  
36  
37 717 Si, B., Liang, Y., Zhao, J., Zhang, Y., Liao, X., Jin, H., Liu, H., and Gu, L. (2020). Ggraph: An  
38  
39 718 efficient structure-aware approach for iterative graph processing. IEEE Transactions on Big  
40  
41 719 Data.  
42  
43  
44 720 Smyth, G.K. (2005). Limma: linear models for microarray data. In Bioinformatics and  
45  
46 721 computational biology solutions using R and Bioconductor (Springer), pp. 397-420.  
47  
48  
49 722 Stegen, J.C., Lin, X., Fredrickson, J.K., Chen, X., Kennedy, D.W., Murray, C.J., Rockhold, M.L.,  
50  
51 723 and Konopka, A. (2013). Quantifying community assembly processes and identifying features  
52  
53 724 that impose them. The ISME journal 7, 2069-2079.  
54  
55  
56  
57  
58  
59  
60

- 1  
2  
3  
4 725 Thompson, L.R., Sanders, J.G., McDonald, D., Amir, A., Ladau, J., Locey, K.J., Prill, R.J.,  
5  
6 726 Tripathi, A., Gibbons, S.M., Ackermann, G., *et al.* (2017). A communal catalogue reveals  
7  
8 727 Earth's multiscale microbial diversity. *Nature* 551, 457-463.  
9  
10  
11 728 Truong, D.T., Franzosa, E.A., Tickle, T.L., Scholz, M., Weingart, G., Pasolli, E., Tett, A.,  
12  
13 729 Huttenhower, C., and Segata, N. (2015). MetaPhlan2 for enhanced metagenomic taxonomic  
14  
15 730 profiling. *Nature methods* 12, 902-903.  
16  
17  
18 731 Wemheuer, F., Taylor, J.A., Daniel, R., Johnston, E., Meinicke, P., Thomas, T., and Wemheuer,  
19  
20 732 B. (2020). Tax4Fun2: prediction of habitat-specific functional profiles and functional redundancy  
21  
22 733 based on 16S rRNA gene sequences. *Environmental Microbiome* 15, 1-12.  
23  
24  
25 734 Wen, T., Xie, P., Yang, S., Niu, G., Liu, X., Ding, Z., Xue, C., Liu, Y.X., Shen, Q., and Yuan, J.  
26  
27 735 (2022). ggClusterNet: An R package for microbiome network analysis and modularity-based  
28  
29 736 multiple network layouts. *iMeta* 1, e32.  
30  
31  
32 737 Wickham, H. (2011). ggplot2. *Wiley interdisciplinary reviews: computational statistics* 3, 180-  
33  
34 738 185.  
35  
36 739 Wickham, H. (2012). reshape2: Flexibly reshape data: a reboot of the reshape package. R  
37  
38 740 package version 1.  
39  
40 741 Wickham, H., Francois, R., Henry, L., and Müller, K. (2014). dplyr. Paper presented at: useR!  
41  
42 742 Conference.  
43  
44 743 Wickham, H., and Wickham, M.H. (2020). Package 'plyr'. *A Grammar of Data Manipulation R*  
45  
46 744 package version 8.  
47  
48 745 Wirbel, J., Zych, K., Essex, M., Karcher, N., Kartal, E., Salazar, G., Bork, P., Sunagawa, S.,  
49  
50 746 and Zeller, G. (2021). Microbiome meta-analysis and cross-disease comparison enabled by the  
51  
52  
53  
54  
55  
56  
57  
58  
59  
60

- 1  
2  
3  
4 747 SIAMCAT machine learning toolbox. *Genome Biology* 22, 93.  
5  
6 748 Wood, D.E., and Salzberg, S.L. (2014). Kraken: ultrafast metagenomic sequence classification  
7  
8  
9 749 using exact alignments. *Genome biology* 15, 1-12.  
10  
11 750 Xu, S., Li, L., Luo, X., Chen, M., Tang, W., Zhan, L., Dai, Z., Lam, T.T., Guan, Y., and Yu, G.  
12  
13 751 (2022). Ggtree: A serialized data object for visualization of a phylogenetic tree and annotation  
14  
15  
16 752 data. *iMeta* 1, e56.  
17  
18 753 Xu, S., Zhan, L., Tang, W., Wang, Q., Dai, Z., Zhou, L., Feng, T., Chen, M., Wu, T., and Hu, E.  
19  
20 754 (2023). MicrobiotaProcess: A comprehensive R package for deep mining microbiome. *The*  
21  
22  
23 755 *Innovation*.  
24  
25  
26 756 Zhao, Y., Federico, A., Faits, T., Manimaran, S., Segrè, D., Monti, S., and Johnson, W.E. (2021).  
27  
28  
29 757 animalcules: interactive microbiome analytics and visualization in R. *Microbiome* 9, 1-16.  
30  
31  
32  
33  
34  
35  
36  
37  
38  
39  
40  
41  
42  
43  
44  
45  
46  
47  
48  
49  
50  
51  
52  
53  
54  
55  
56  
57  
58  
59  
60

**Table.1 Comparison of the advantages and limitations of the six integrated R packages**

| R package          | Function                                                                                                                                                                                                                               | Advantages                                                                                                                                                                                                                                                                                                                                                                                                                                                                                                                                     | Limitations                                                                                                                                                                                                                                                                                                                                                  |
|--------------------|----------------------------------------------------------------------------------------------------------------------------------------------------------------------------------------------------------------------------------------|------------------------------------------------------------------------------------------------------------------------------------------------------------------------------------------------------------------------------------------------------------------------------------------------------------------------------------------------------------------------------------------------------------------------------------------------------------------------------------------------------------------------------------------------|--------------------------------------------------------------------------------------------------------------------------------------------------------------------------------------------------------------------------------------------------------------------------------------------------------------------------------------------------------------|
| phyloseq           | <ol style="list-style-type: none"> <li>1. Diversity analysis including alpha / beta diversity, community composition, and phylogenetic tree analysis.</li> <li>2. Network analysis.</li> </ol>                                         | <ol style="list-style-type: none"> <li>1. Firstly utilize S4 class objects.</li> <li>2. Possess a set of data processing and analysis functions based on phyloseq objects.</li> <li>3. Combine evolutionary trees with microbial abundance to display species richness (Fig.S2G).</li> <li>4. Ordinate analysis can be applied to arrange the order of samples and microbes on heatmap rows and columns (Fig.S2F).</li> <li>5. The network analysis process is simplified (Fig.S2E).</li> <li>6. Offer over 30 distance algorithms.</li> </ol> | <ol style="list-style-type: none"> <li>1. Introduction to phyloseq objects can be challenging for beginners.</li> <li>2. Statistical tests, including diversity tests and community/feature-level microbial difference analysis, are not well integrated into community analysis.</li> <li>3. Network analysis lacks test, attribute calculation.</li> </ol> |
| microbiome         | <ol style="list-style-type: none"> <li>1. Diversity analysis only including alpha / beta diversity, community composition).</li> </ol>                                                                                                 | <ol style="list-style-type: none"> <li>1. The alpha diversity index is abundance.</li> <li>2. The t-SNE and CAP ordination algorithms.</li> <li>3. The stacked bar chart for community composition analysis can be sorted by specified microbial features (Fig.S3C).</li> <li>4. Visualization of individual microbes (Fig.S2D).</li> </ol>                                                                                                                                                                                                    | <ol style="list-style-type: none"> <li>1. The t-SNE and CAP ordination analyses frequently encounter errors.</li> <li>2. The statistical tests, including diversity tests, community and feature-level differences tests is not ideal.</li> </ol>                                                                                                            |
| MicrobiomeAnalystR | <ol style="list-style-type: none"> <li>1. Diversity analysis including alpha/beta diversity, community composition, and phylogenetic tree analysis.</li> <li>2. Difference analysis.</li> <li>3. Biomarker-based diagnosis.</li> </ol> | <ol style="list-style-type: none"> <li>1. Comprehensive workflow with various functions ranging from data cleaning to visualization.</li> <li>2. Multiple algorithms to correct sequencing errors, leading more accurate evaluation of abundance.</li> <li>3. Various analyses can be performed at different taxonomic levels (Fig.S2E).</li> <li>4. Machine learning can be utilized to search for and extract feature variables (Fig.S2G).</li> <li>5. Difference analysis can be conducted using multiple methods</li> </ol>                | <ol style="list-style-type: none"> <li>1. Difficulties in installing R packages with dependencies.</li> <li>2. Some functions may not work, including network analysis and difference analysis of relative abundance.</li> <li>3. Insufficient explanation of parameters and examples.</li> </ol>                                                            |

1  
2  
3  
4  
5  
6  
7  
8  
9  
10  
11  
12  
13  
14  
15  
16  
17  
18  
19  
20  
21  
22  
23  
24  
25  
26  
27  
28  
29  
30  
31  
32  
33  
34  
35  
36  
37  
38  
39  
40  
41  
42  
43  
44  
45  
46

|              |                                                                                                                                                                                                                                                                                                                                                                  |                                                                                                                                                                                                                                                                                                                                                                                                                                                                   |                                                                                                                                                                                                    |
|--------------|------------------------------------------------------------------------------------------------------------------------------------------------------------------------------------------------------------------------------------------------------------------------------------------------------------------------------------------------------------------|-------------------------------------------------------------------------------------------------------------------------------------------------------------------------------------------------------------------------------------------------------------------------------------------------------------------------------------------------------------------------------------------------------------------------------------------------------------------|----------------------------------------------------------------------------------------------------------------------------------------------------------------------------------------------------|
|              |                                                                                                                                                                                                                                                                                                                                                                  | such as LEfSe and metagenomeSeq.                                                                                                                                                                                                                                                                                                                                                                                                                                  |                                                                                                                                                                                                    |
| Animalcules  | <ol style="list-style-type: none"> <li>1. Sequence statistics visualization.</li> <li>2. Diversity analysis including alpha/beta diversity, community composition.</li> <li>3. Difference analysis and biomarker identification.</li> </ol>                                                                                                                      | <ol style="list-style-type: none"> <li>1. The commonly used objects in omics analysis, such as SummarizedExperiment, can be utilized.</li> <li>2. It can be interactively executed in R.</li> <li>3. A 3D clustering plot can be generated.</li> </ol>                                                                                                                                                                                                            | <ol style="list-style-type: none"> <li>1. Unable to save vector graphics and completed tables.</li> <li>2. Insufficient functionality.</li> </ol>                                                  |
| microeco     | <ol style="list-style-type: none"> <li>1. Diversity analysis including alpha / beta diversity, community composition, and phylogenetic tree analysis.</li> <li>2. Difference analysis.</li> <li>3. Biomarker identification.</li> <li>4. Network analysis.</li> <li>5. Correlation analysis with other indicators.</li> <li>6. Functional prediction.</li> </ol> | <ol style="list-style-type: none"> <li>1. R6 class more expansibility than phyloseq objects.</li> <li>2. Simple function calling.</li> <li>3. Rich graphical representation of diversity and difference analysis results (Fig.S6A-G).</li> <li>4. Unique correlation analysis of other indicators.</li> <li>5. Abundant network analysis algorithms with comprehensive functionality (Fig.S6J).</li> <li>6. FAPROTAX and FUNGuild function prediction.</li> </ol> | <ol style="list-style-type: none"> <li>1. New data structures increase the cost of learning time.</li> <li>2. So many functions and dependency caused frequent some malfunctioning.</li> </ol>     |
| EasyAmplicon | <ol style="list-style-type: none"> <li>1. Diversity analysis</li> <li>2. Provide script for preparing STAMP, LEfSe, PICRUSt 1&amp;2, BugBase, FAPROTAX, iTOL</li> <li>3. Provide slide tutorial for each analysis and QIIME 2 pipeline</li> </ol>                                                                                                                | <ol style="list-style-type: none"> <li>1. It can be used in both command-line mode and interactive mode within RStudio.</li> <li>2. It offers multiple visualization styles, allowing for easy generation of publication-quality figures (Fig.S7).</li> <li>3. Its open-source code facilitates reproducible analysis and allows for personalized modifications</li> </ol>                                                                                        | <ol style="list-style-type: none"> <li>1. Need using the most popular tools, STAMP, LEfSe, PICRUSt 1&amp;2, BugBase, FAPROTAX, iTOL.</li> <li>2. Some functions need to be development.</li> </ol> |

## Figures & Legends

### **Figure 1. Microbial community data analysis workflow and related R packages.**

(A) Overview of microbial community data analysis workflow. Core files are feature table (OTU), Taxonomy, sample metadata (Metadata), phylogenetic tree (Tree), and representative sequences (Ref.fa). (B) Detail of microbial community analysis workflow. First, the raw data can be processed by using USEARCH/VSEARCH, QIIME 2, DADA2 packages. Then, the important files are saved and used for downstream analysis in R language and RStudio software. Many microbial analysis methods rely on numerous R packages developed with R language. *The font size in the word cloud represents the number of citations of R packages.* (C) Commonly used R packages for data manipulation and visualization. (D) Classification of R packages for six categories in microbial community analysis.

### **Figure 2. Introduction to the functions of integrated microbial analysis R packages.**

Microbial community analysis can be divided into diversity analysis, difference analysis, biomarker identification, correlation and network analysis, functional prediction, and other microbial community analysis (community construction process, association analysis with other indicators).

### **Figure 3. Typical results of integrated microbial community analysis R packages and comparison of similar results.**

Group the analysis results of multiple integrated R packages according to the major categories of microbial community analysis functions. Each main branch in the tree diagram represents a type of microbial community analysis, and there are a total of 10

1  
2  
3  
4 main branches: feature diversity analysis including 1 alpha diversity analysis, 2 beta  
5  
6 diversity analysis, 3 community taxonomic or functional composition analysis, 4  
7  
8 evolutionary or taxonomic tree analysis; 5 difference analysis; 6 biomarker  
9  
10 identification; 7 correlation and network analysis; 8 functional prediction; 9 community  
11  
12 construction process analysis; 10 association analysis with other indicators. Each leaf  
13  
14 (circle) represents a style of the result displayed in the analysis, and the circle number  
15  
16 around the outside of leaf represents the package number of the integrated R package  
17  
18 that the analysis result comes from.  
19  
20  
21  
22  
23  
24

25 **Figure 4. Examples of the best practice results of microbial community analysis in**  
26  
27 **R language.**  
28

29  
30 The selected results include rarefaction curve (A), Principal coordinate analysis scatter  
31  
32 plot (B), Venn network graph (C), evolutionary tree (D), LEfSe cladogram (E),  
33  
34 difference analysis STAMP style extended error bar plot (F), difference analysis  
35  
36 Manhattan plot (G), difference analysis multi-group volcano plot (H), biomarker  
37  
38 selection ring-column chart (I), network graph (J), correlation connection combination  
39  
40 graph (K), source tracing analysis pie chart (L).  
41  
42  
43  
44  
45  
46  
47  
48  
49  
50  
51  
52  
53  
54  
55  
56  
57  
58  
59  
60



**Figure 1**

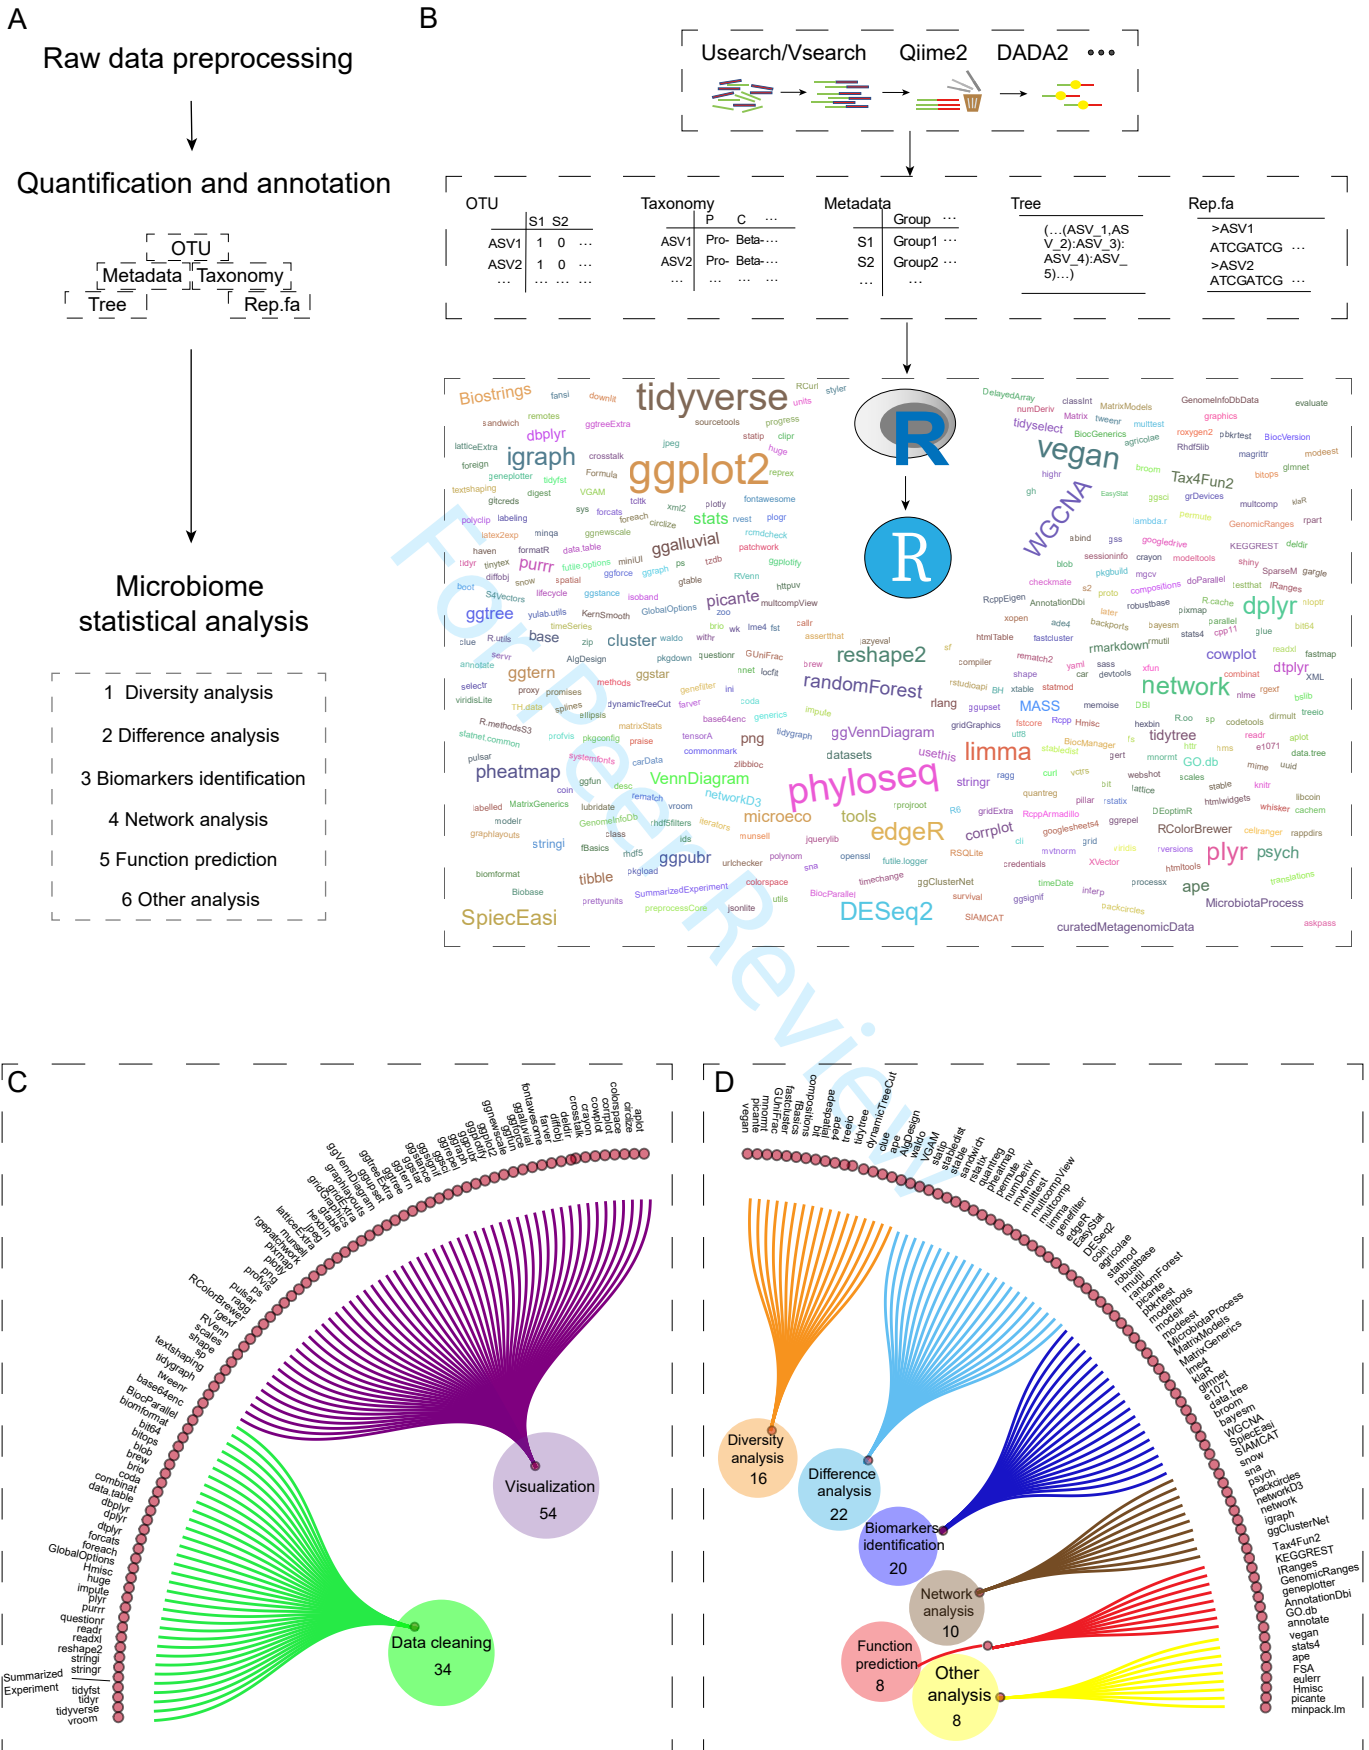

**Figure 2**

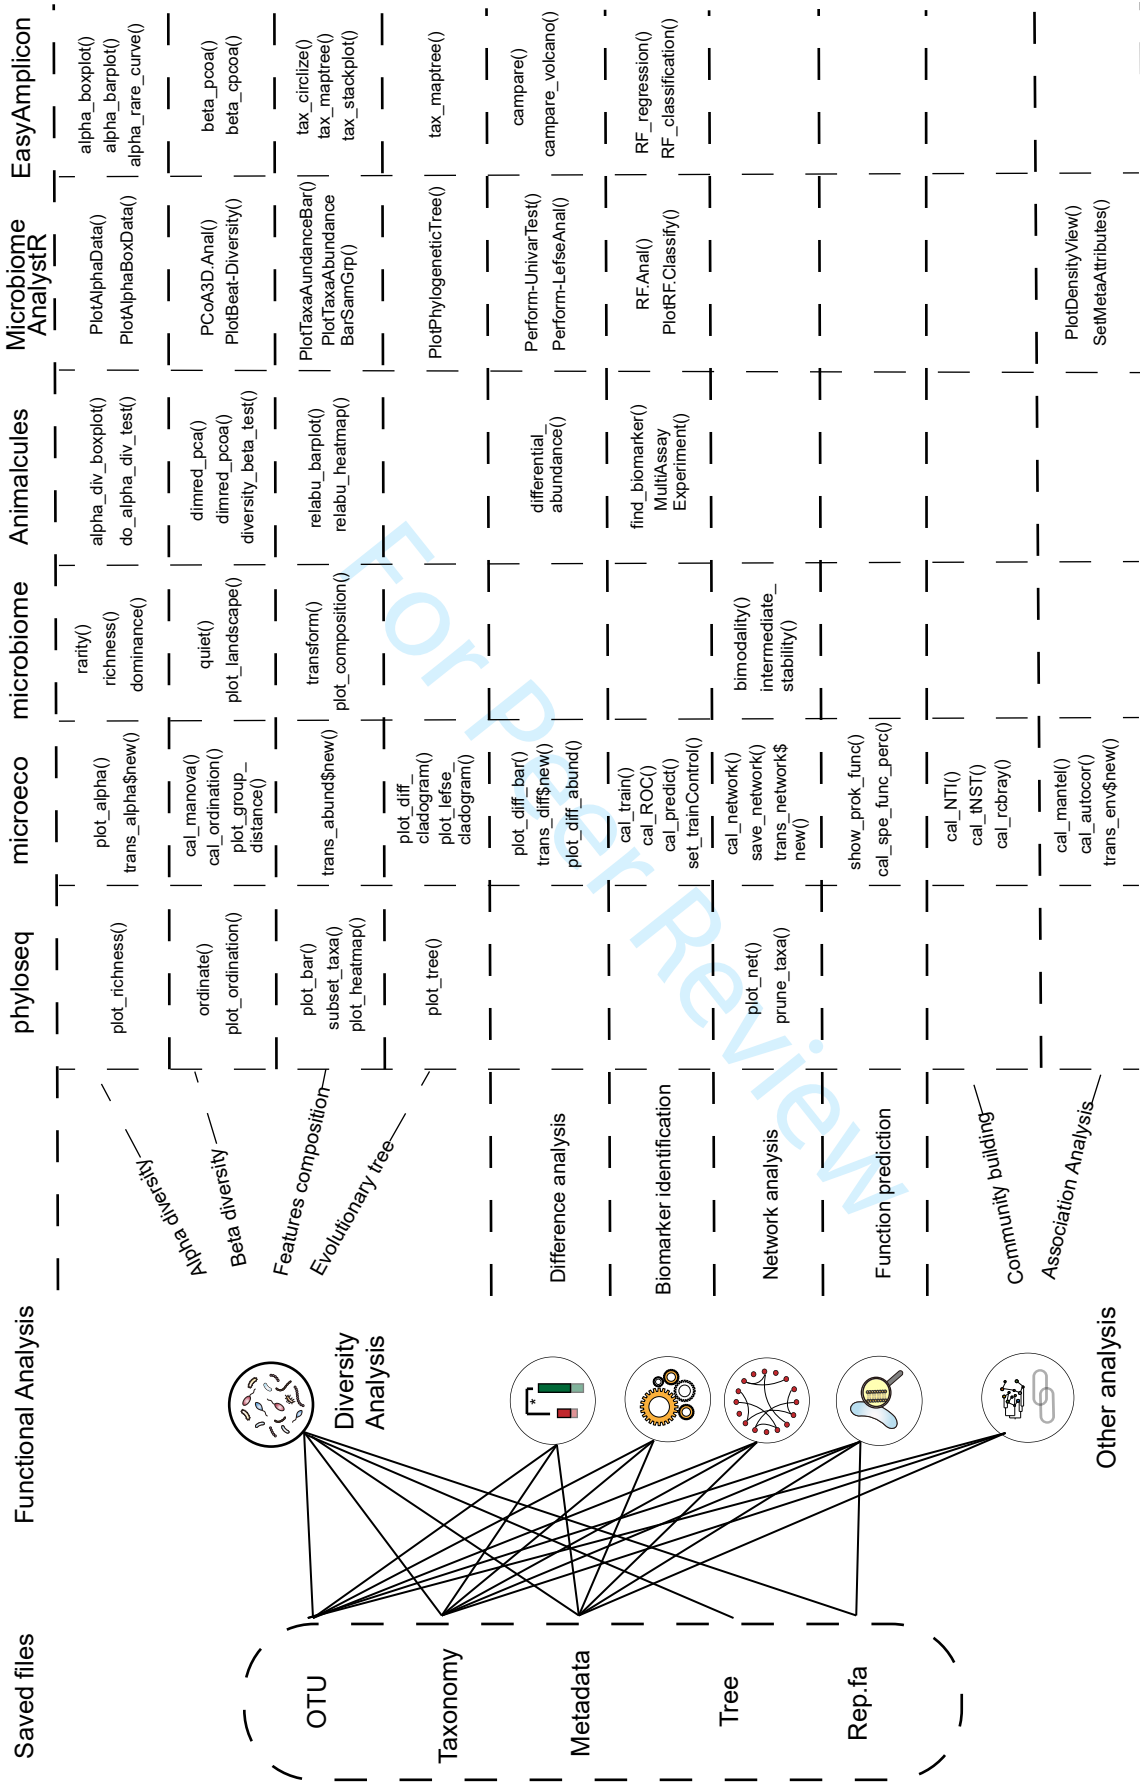

Figure 3

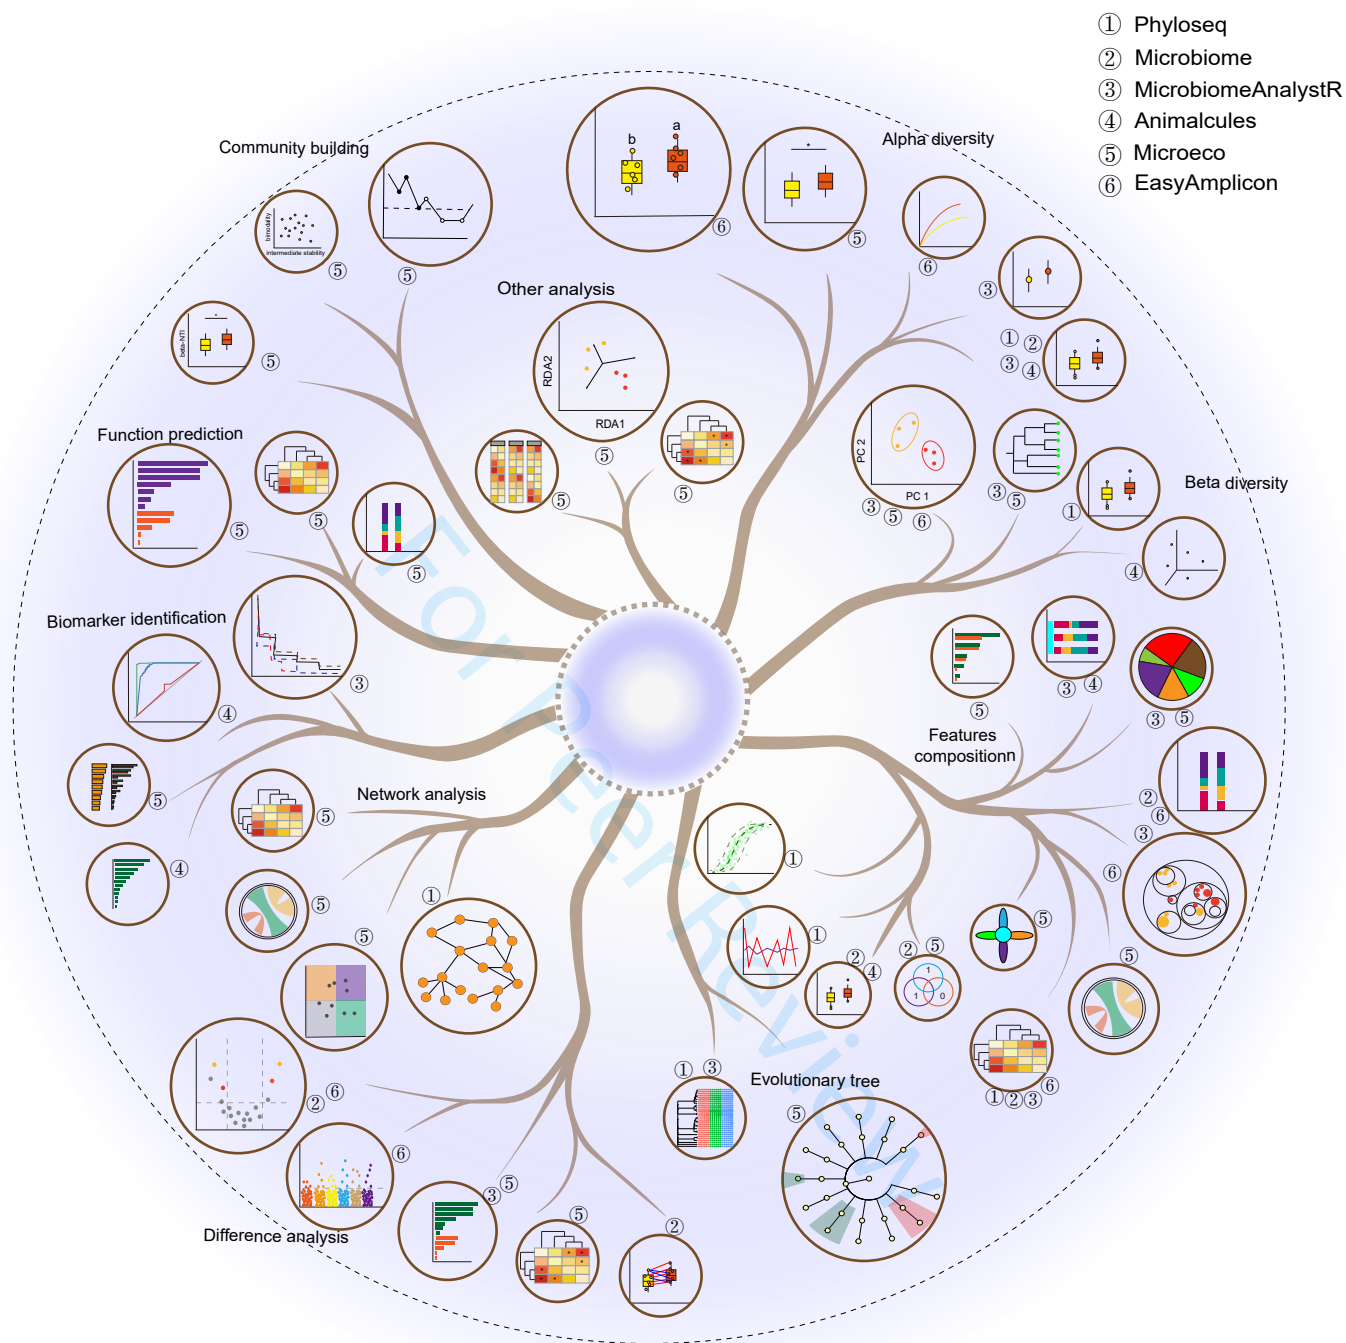

Figure 4

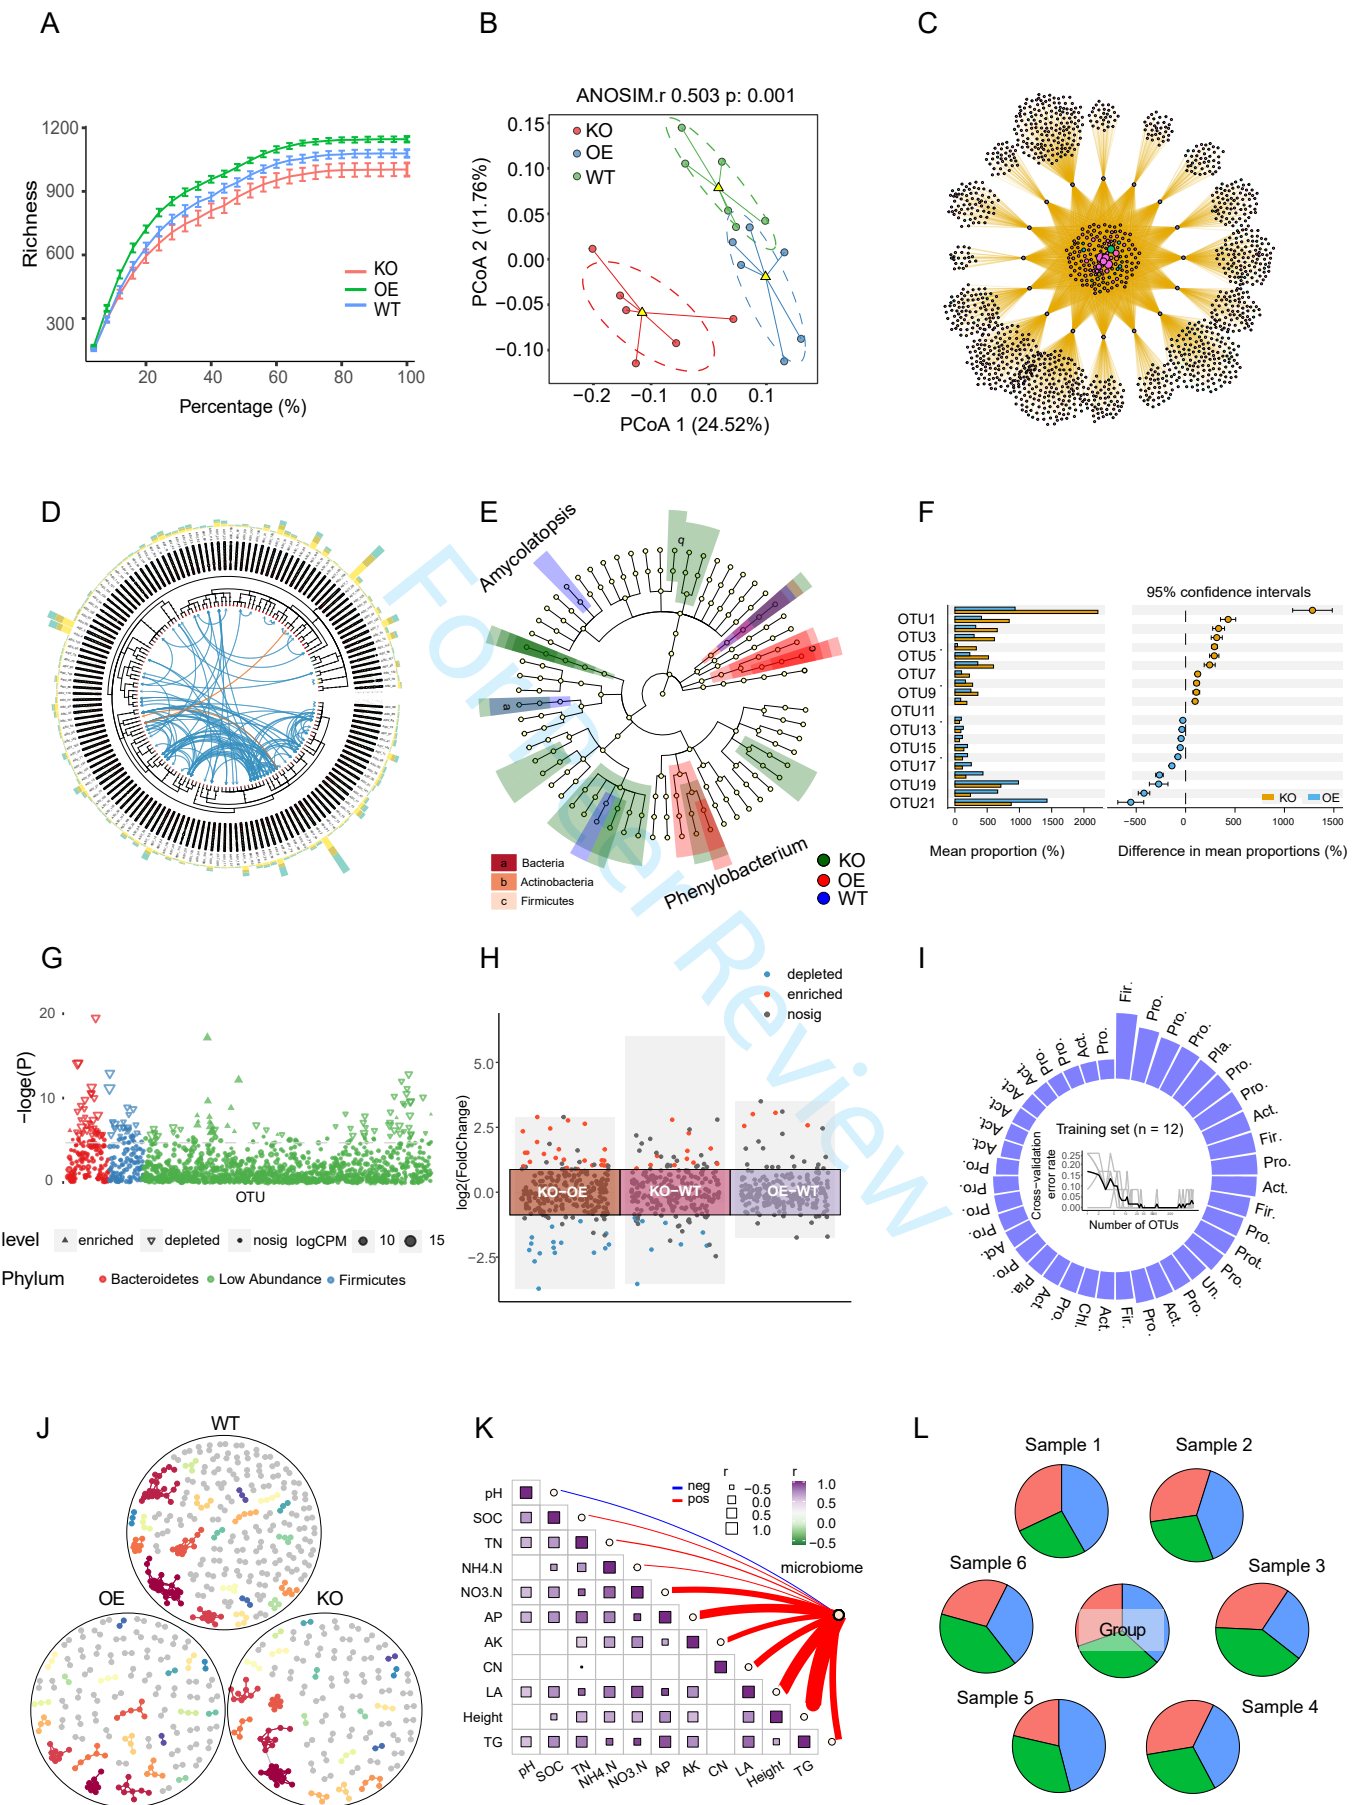

Fig. S1 Showcases 9 specific categories of 324 R packages required for microbiome analysis. These packages have been classified into the following categories: dependent, data cleaning, visualization, diversity analysis, difference analysis, biomarker identification, correlation and network analysis, functional prediction, and other analysis (community construction process, association analysis with other indicators).

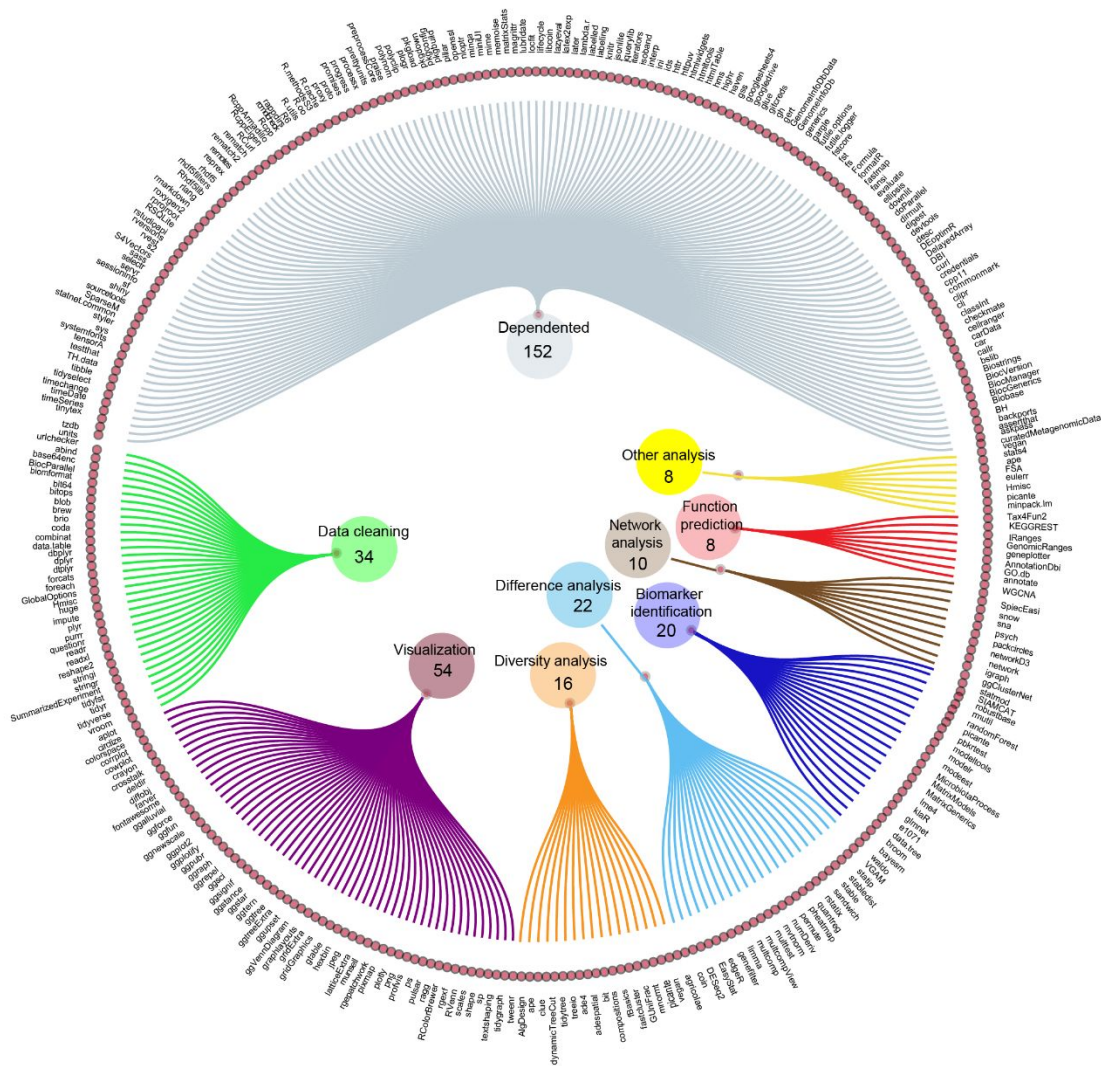

Fig. S2 Partial display of results from integrated R package phyloseq

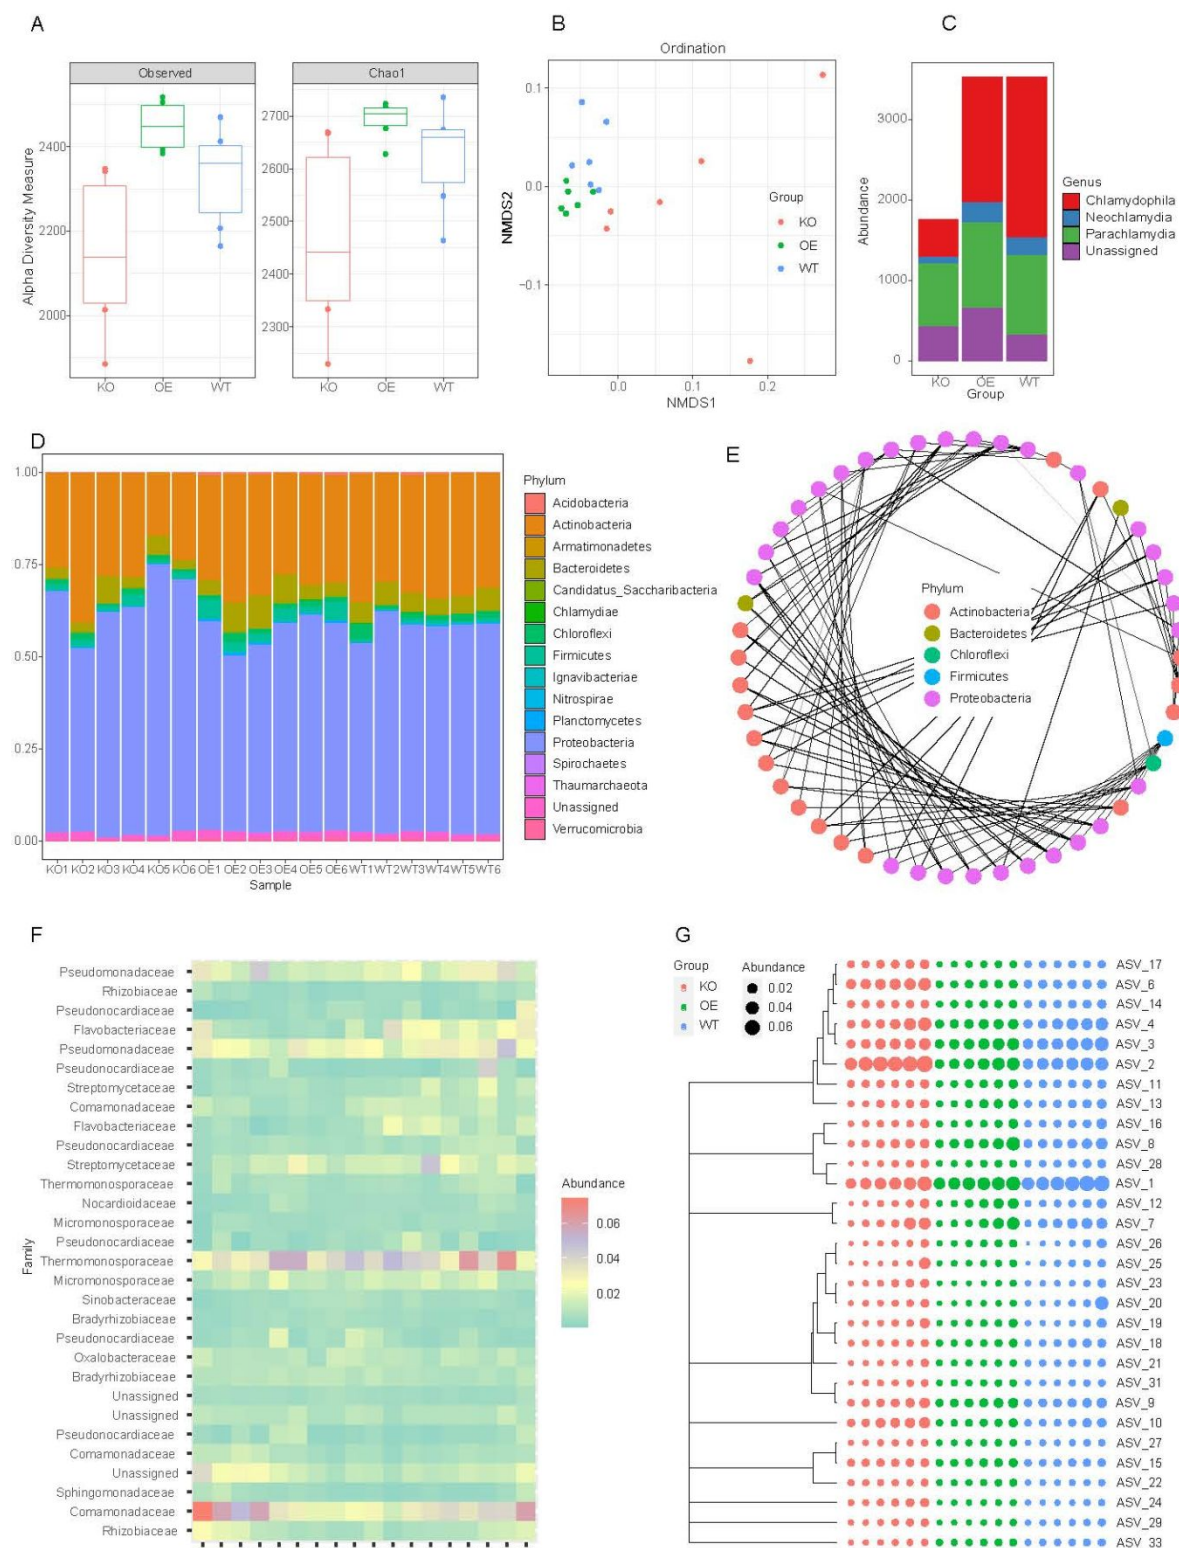

Fig. S3 Partial display of results from integrated R package microbiome

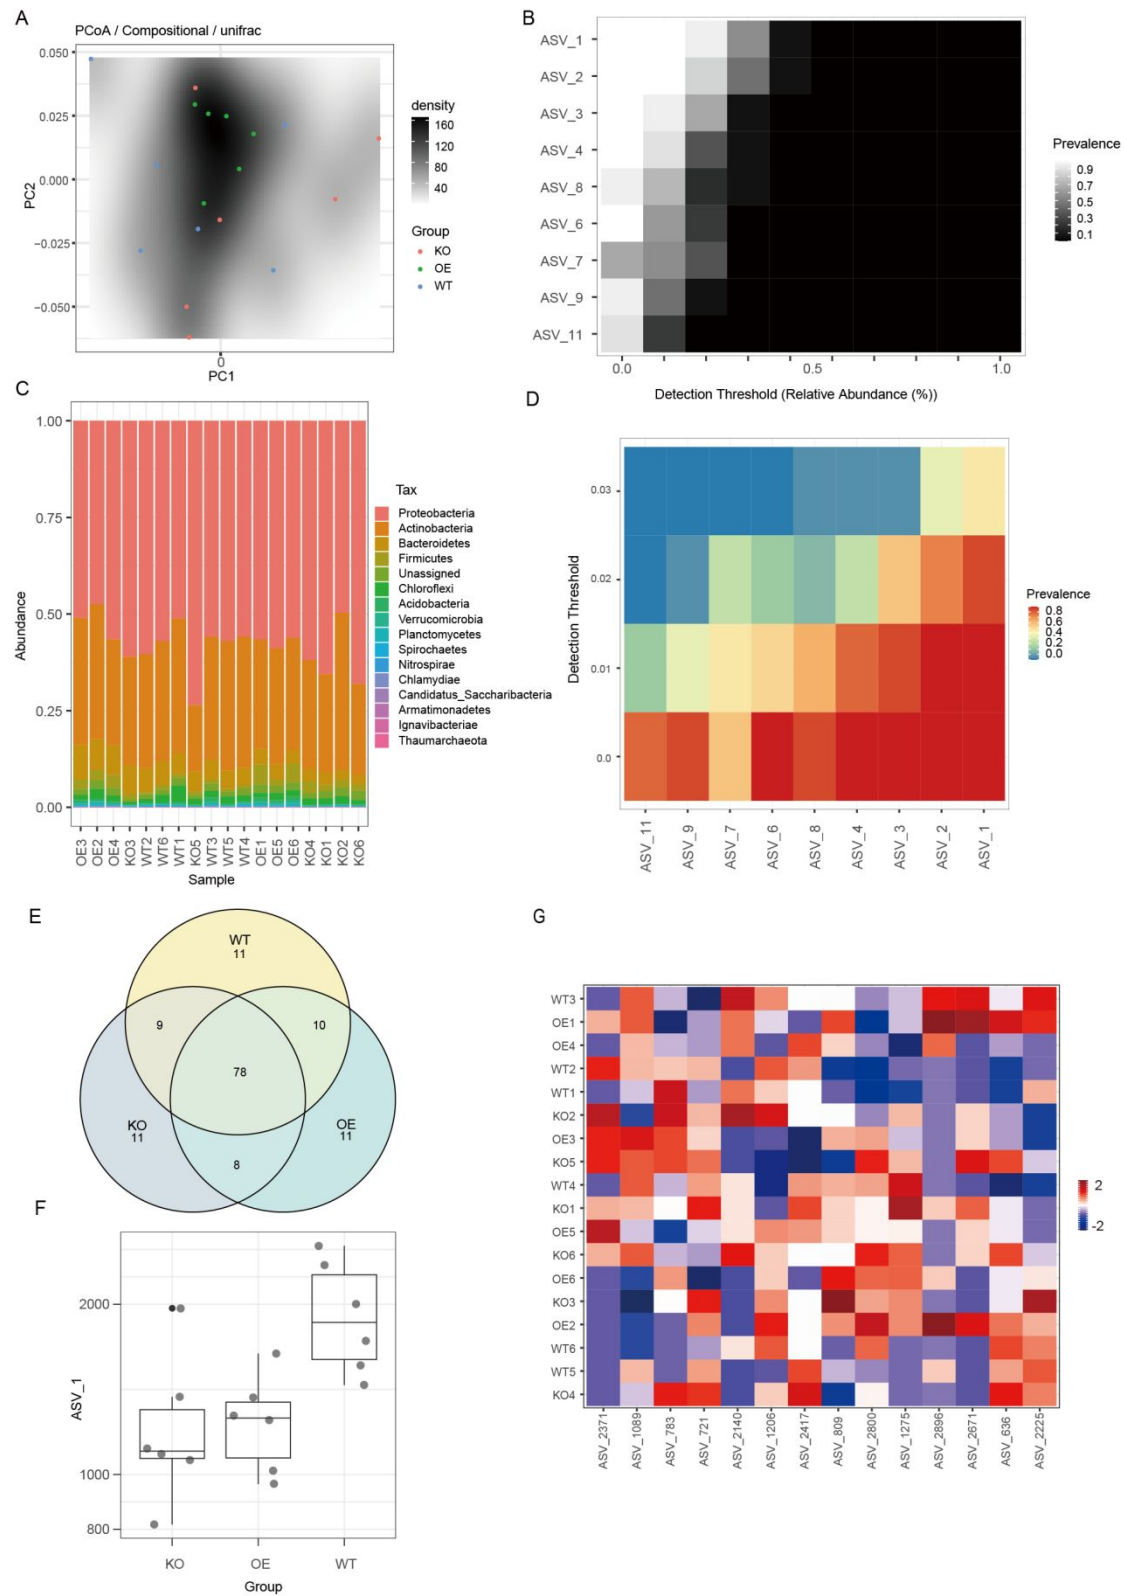

Fig. S4 Partial display of results from integrated R package MicrobiomeAnalystR

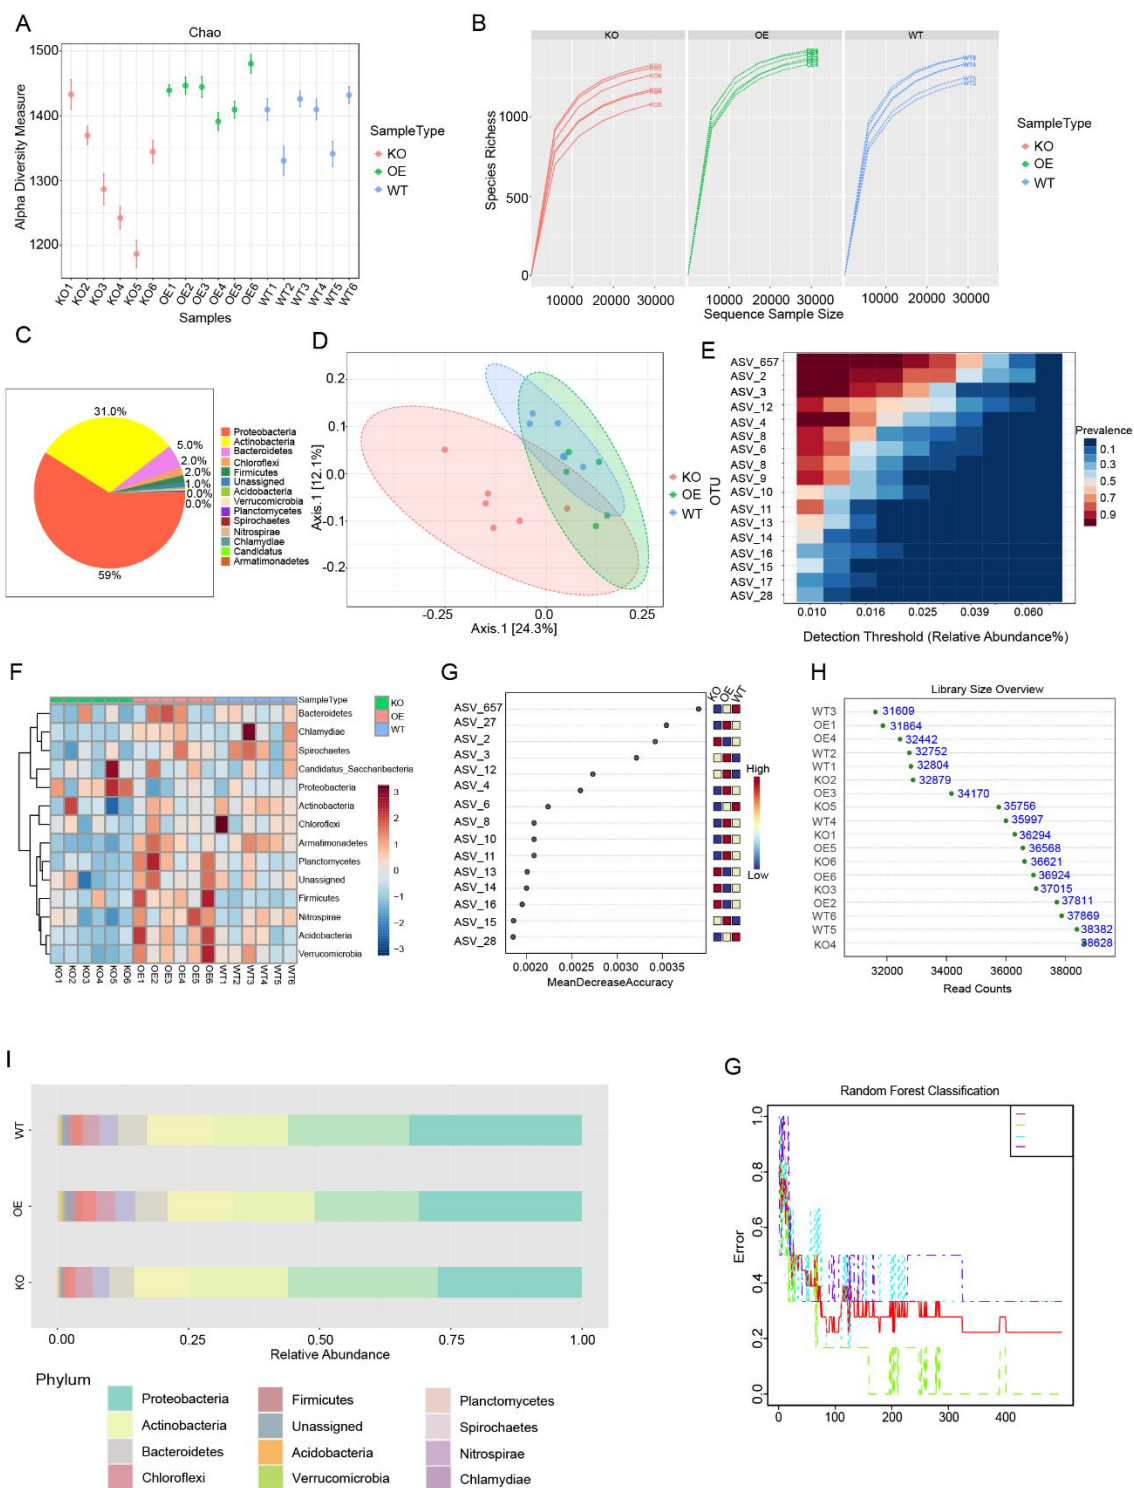



Fig. S5 Partial display of results from integrated R package Animalcules

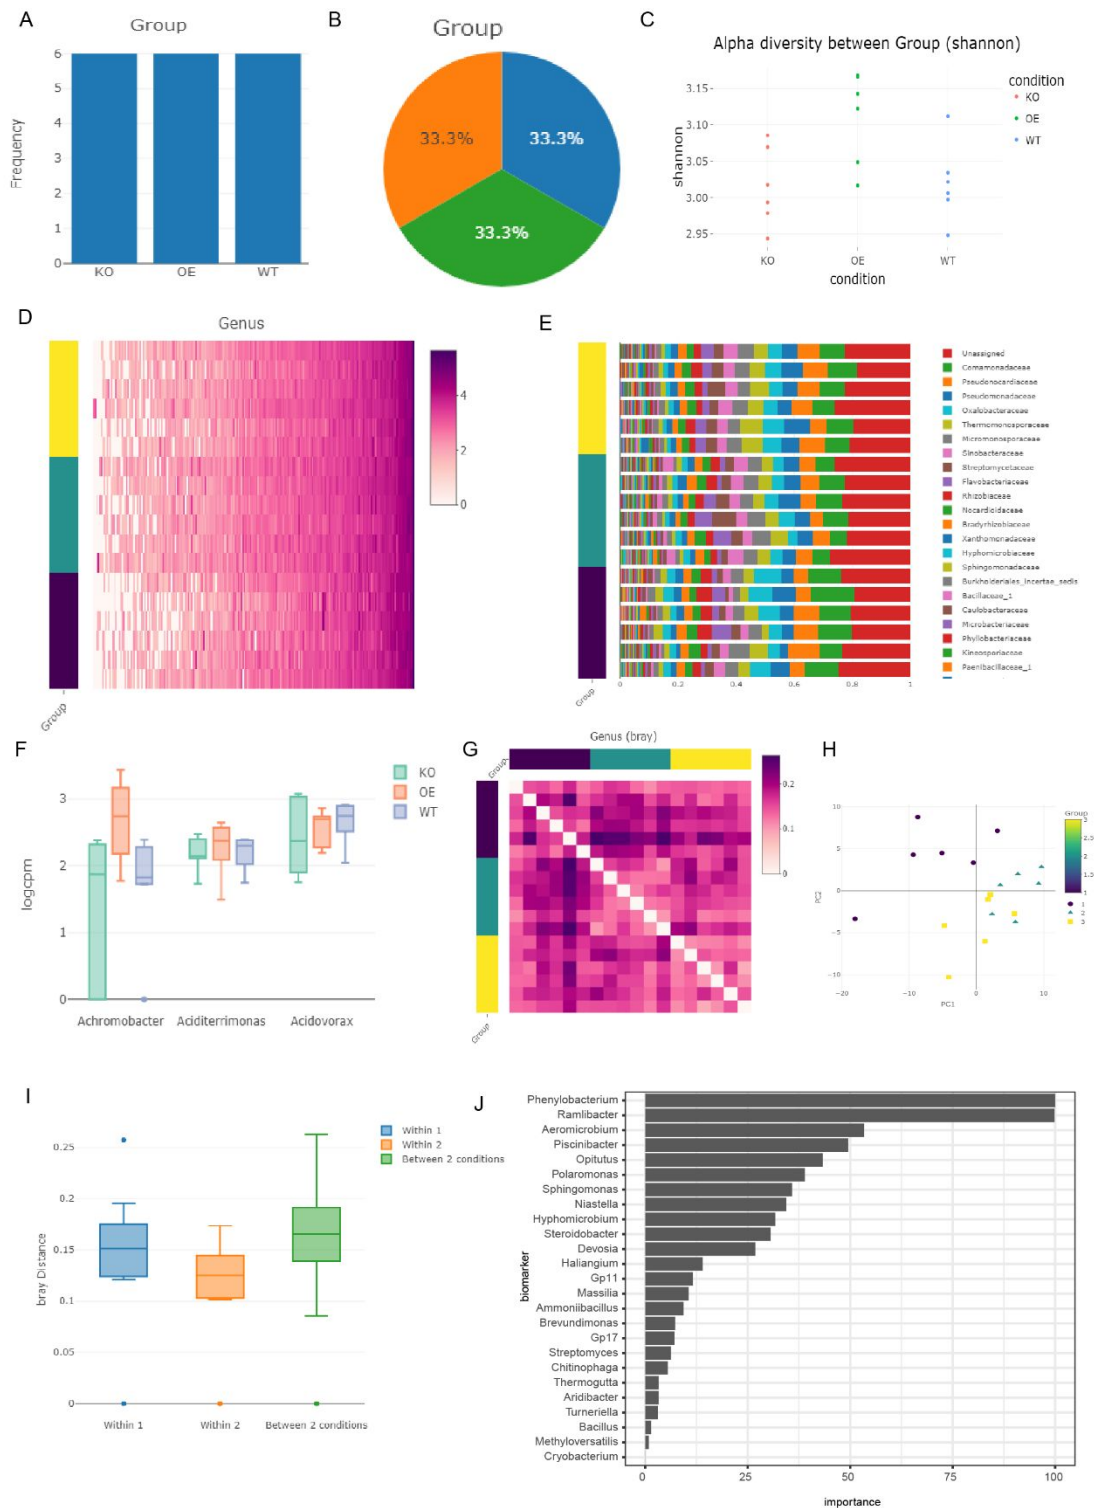

Fig. S6 Partial display of results from integrated R package microeco

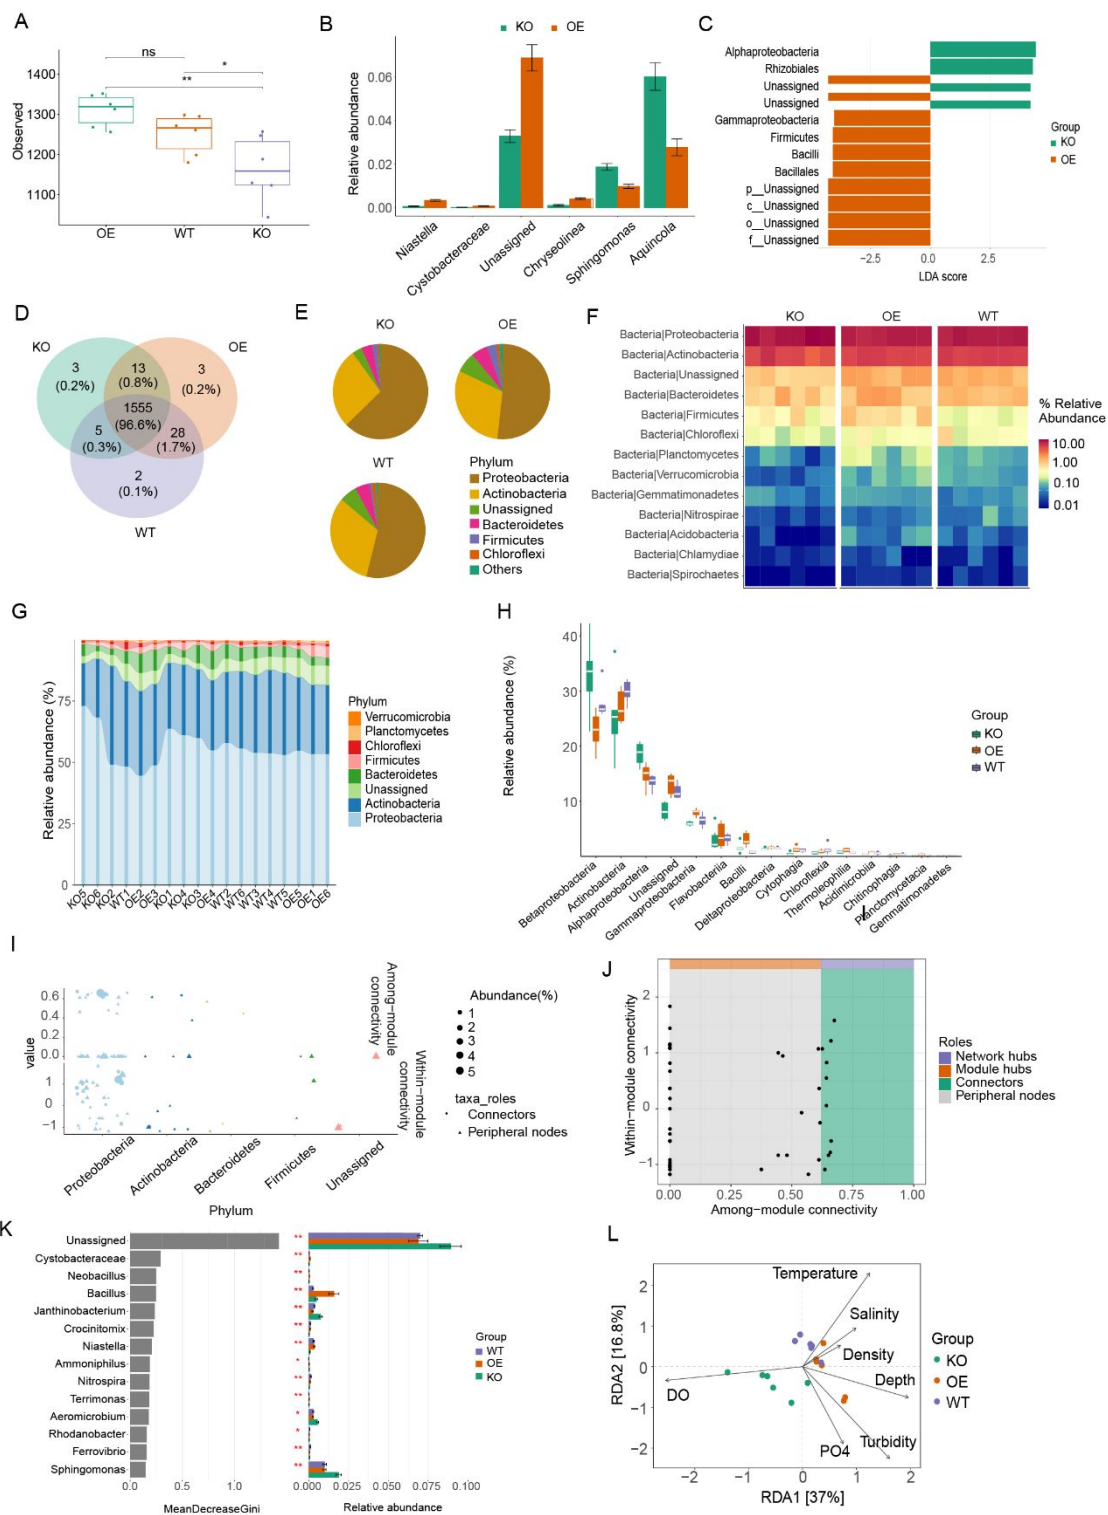

Fig. S7 Partial display of results from integrated R package amplicon

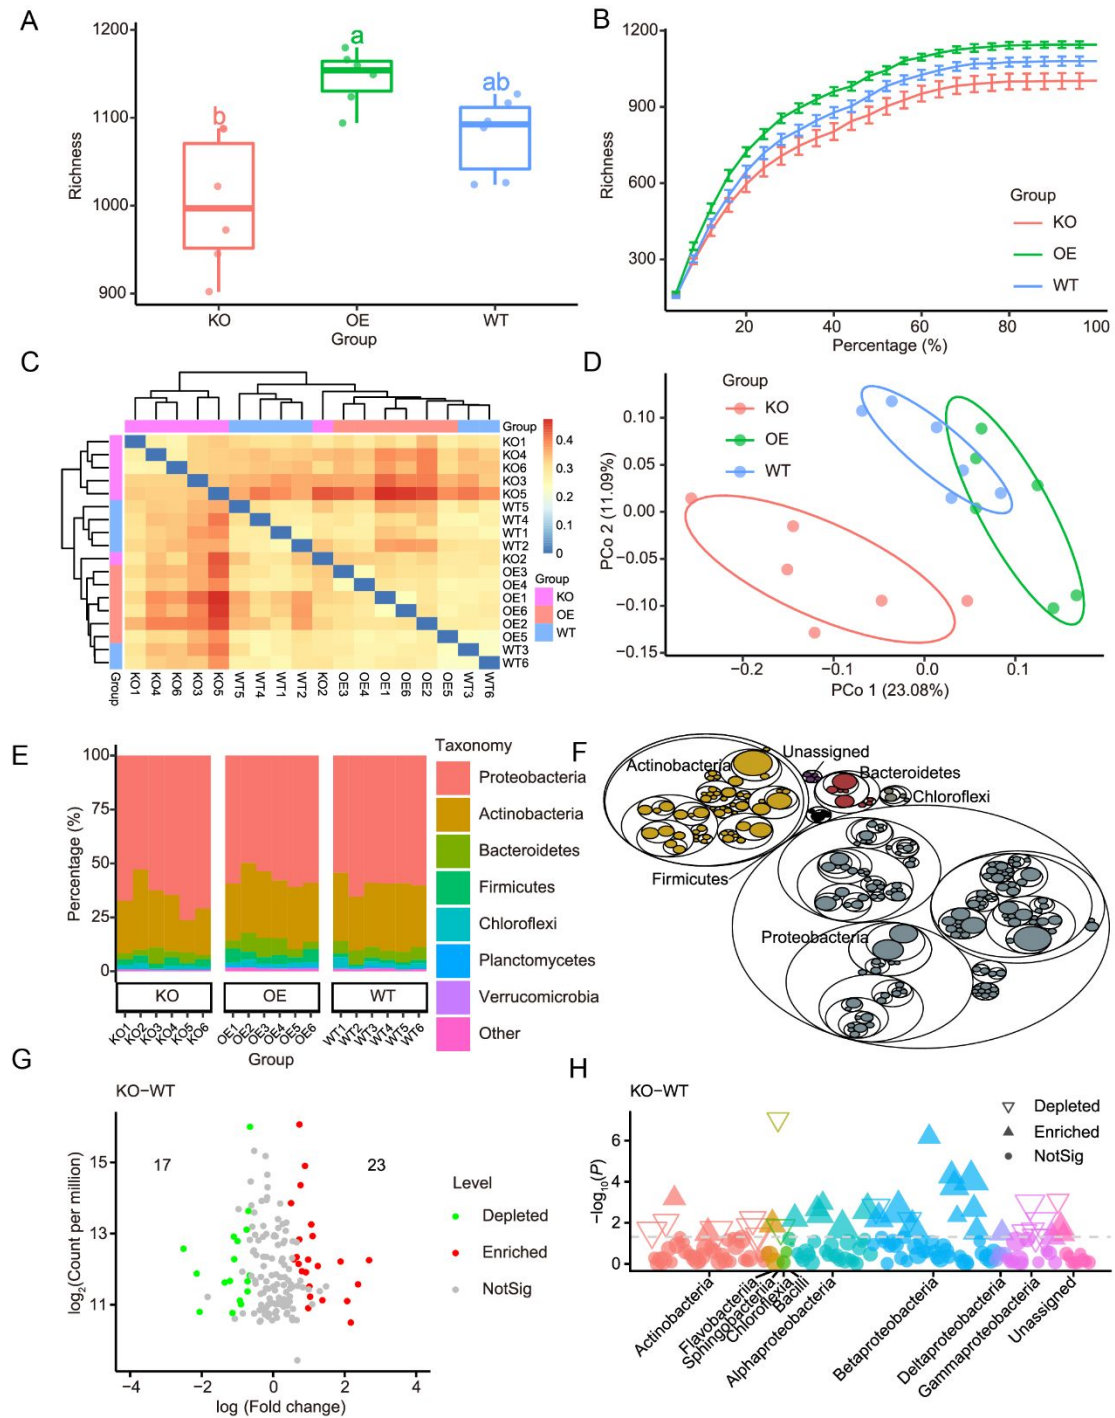

Fig. S8 Best practice analysis flow chart for microbiome data analysis

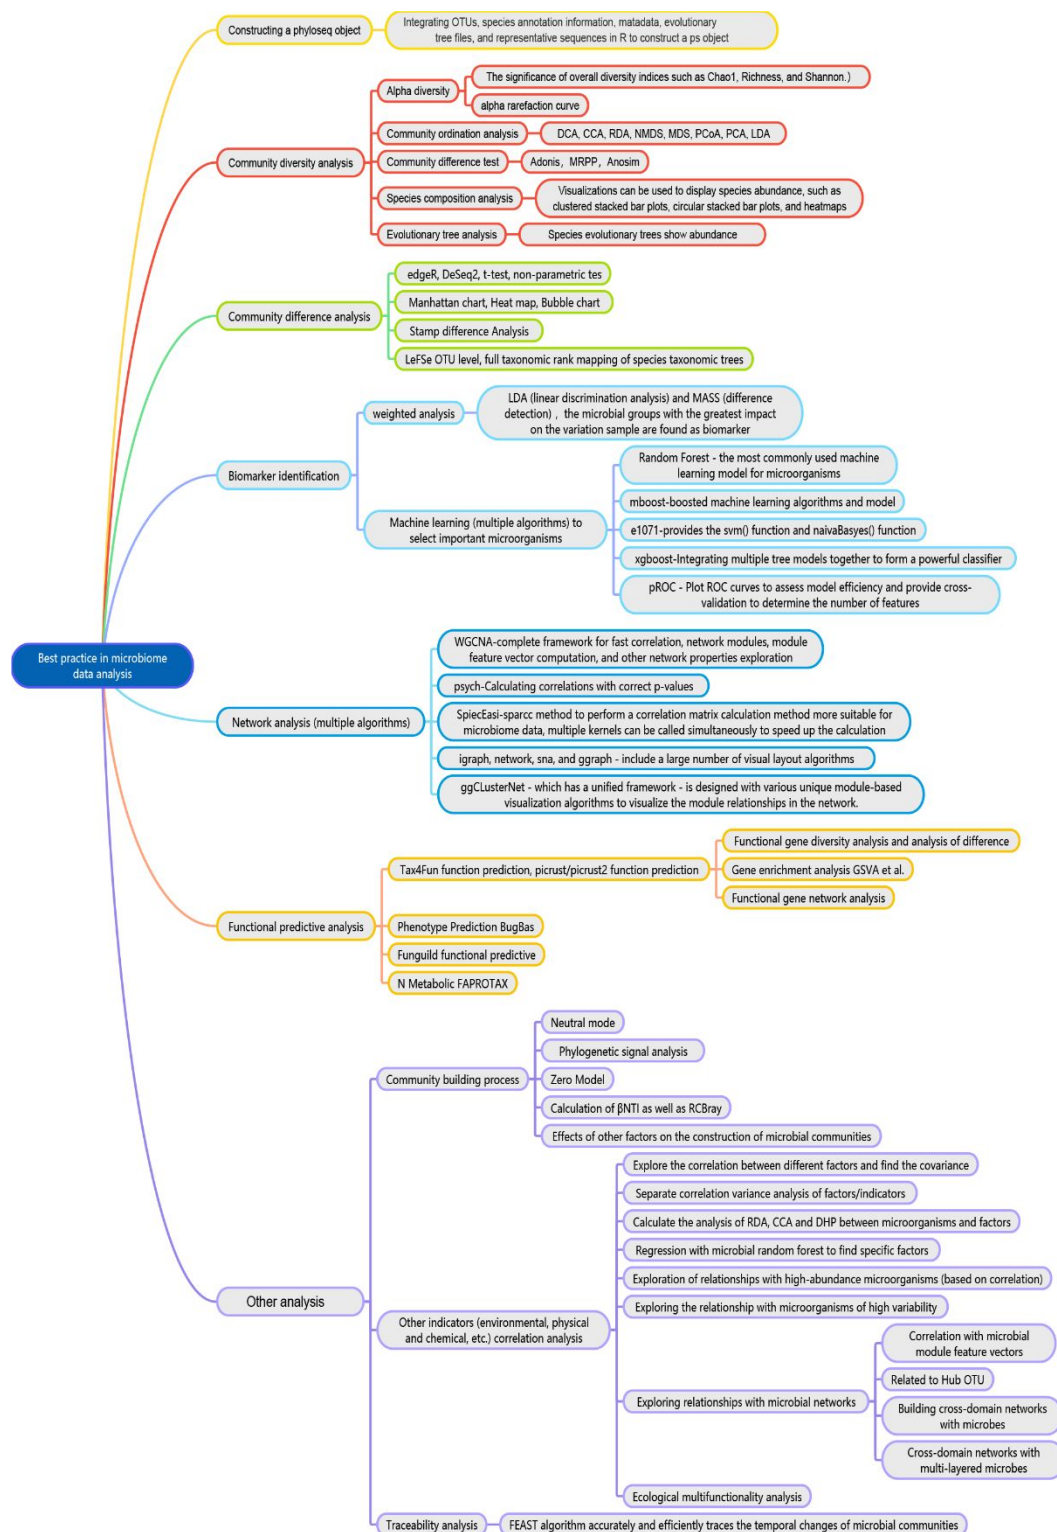

Fig. S9 Partial display of results from best practices in microbiome data analysis. (A-I) diversity analysis

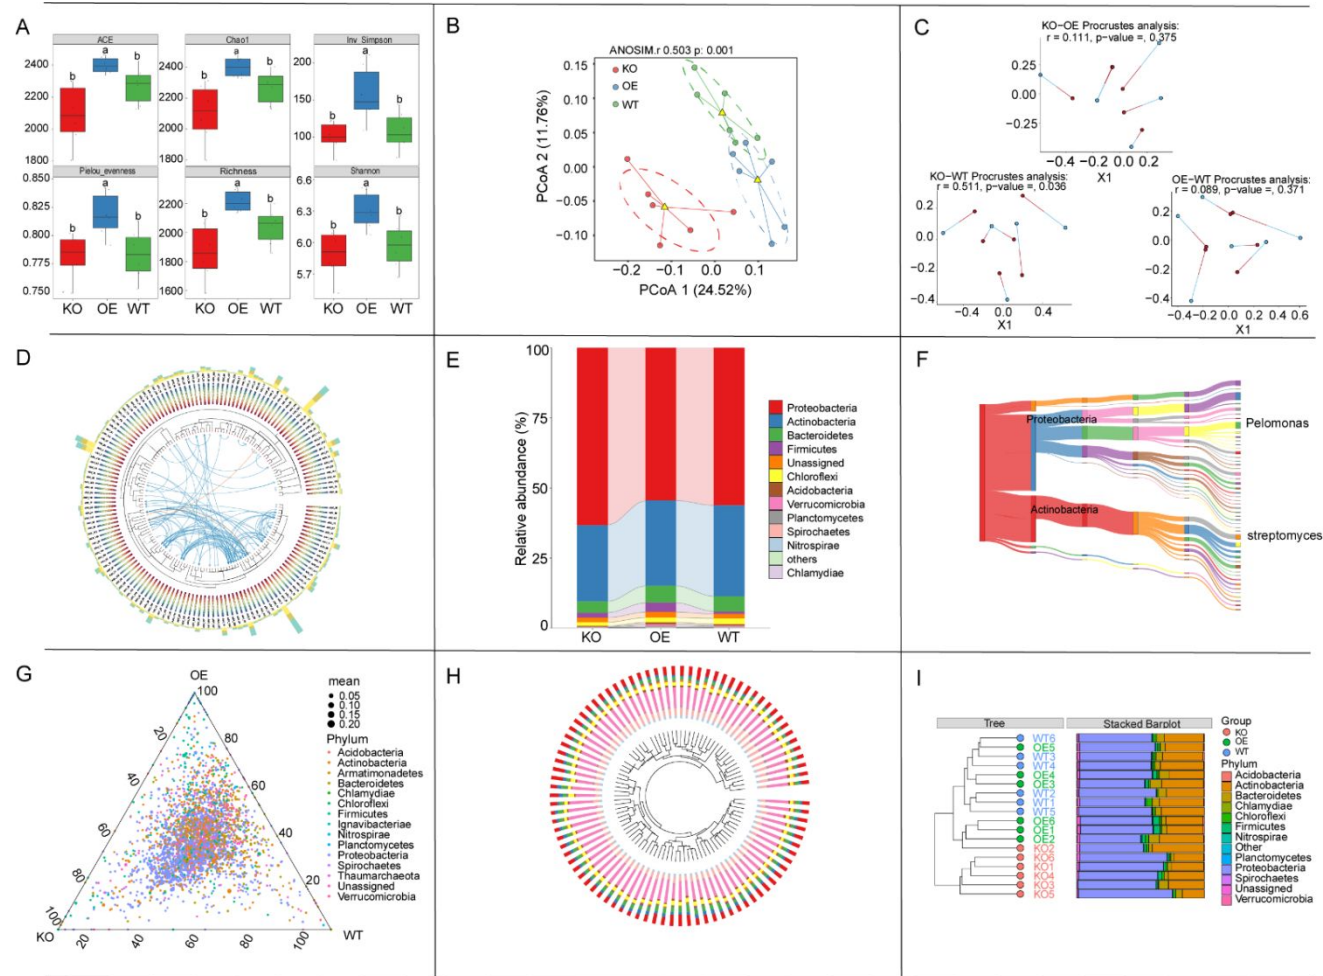

Fig. S10 Partial display of results from best practices in microbiome data analysis. (A-E) diversity analysis, (F-I) difference analysis

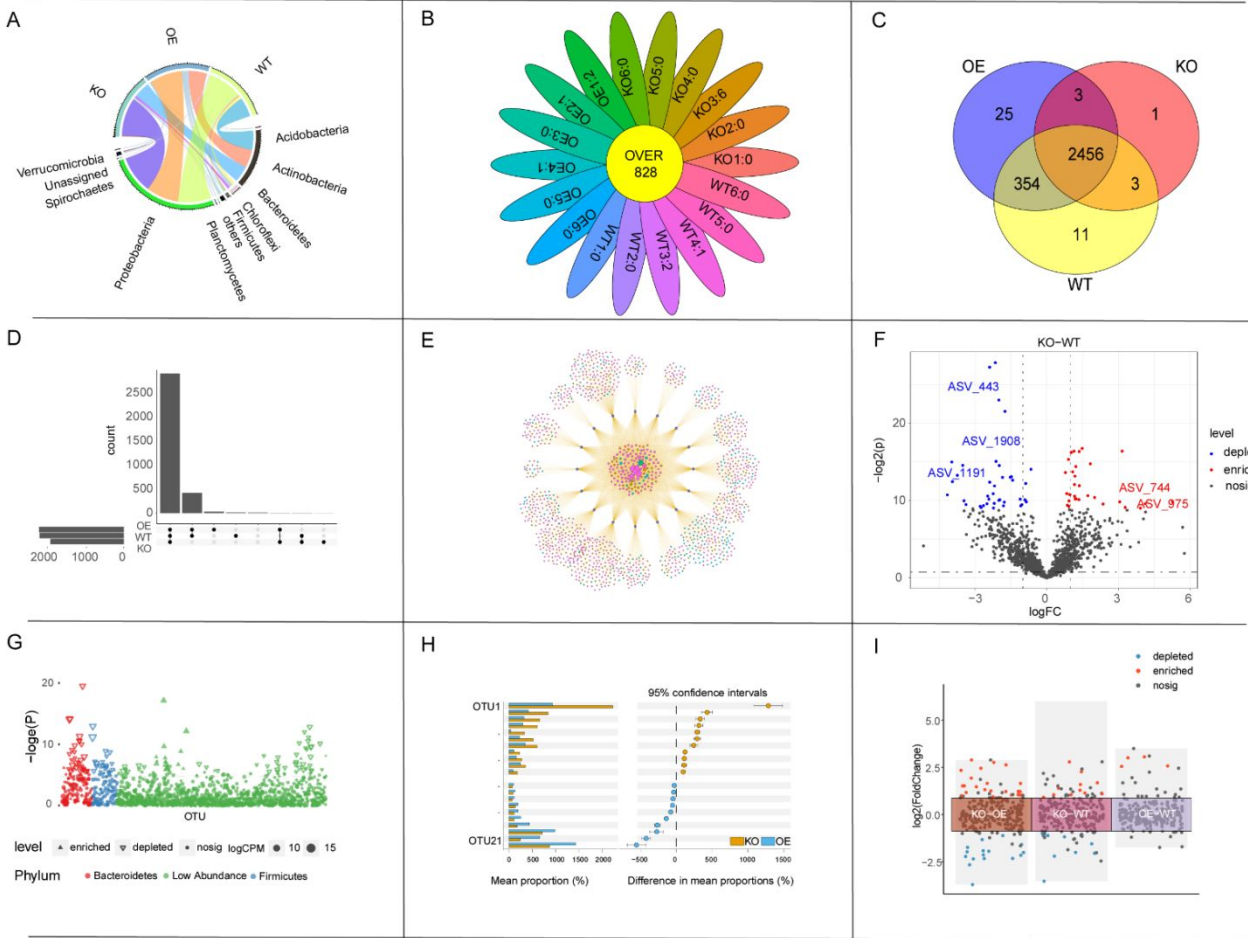

Fig. S11 Partial display of results from best practices in microbiome data analysis. (A-B) difference analysis, (C-D) biomarker identification, (E-I) network analysis

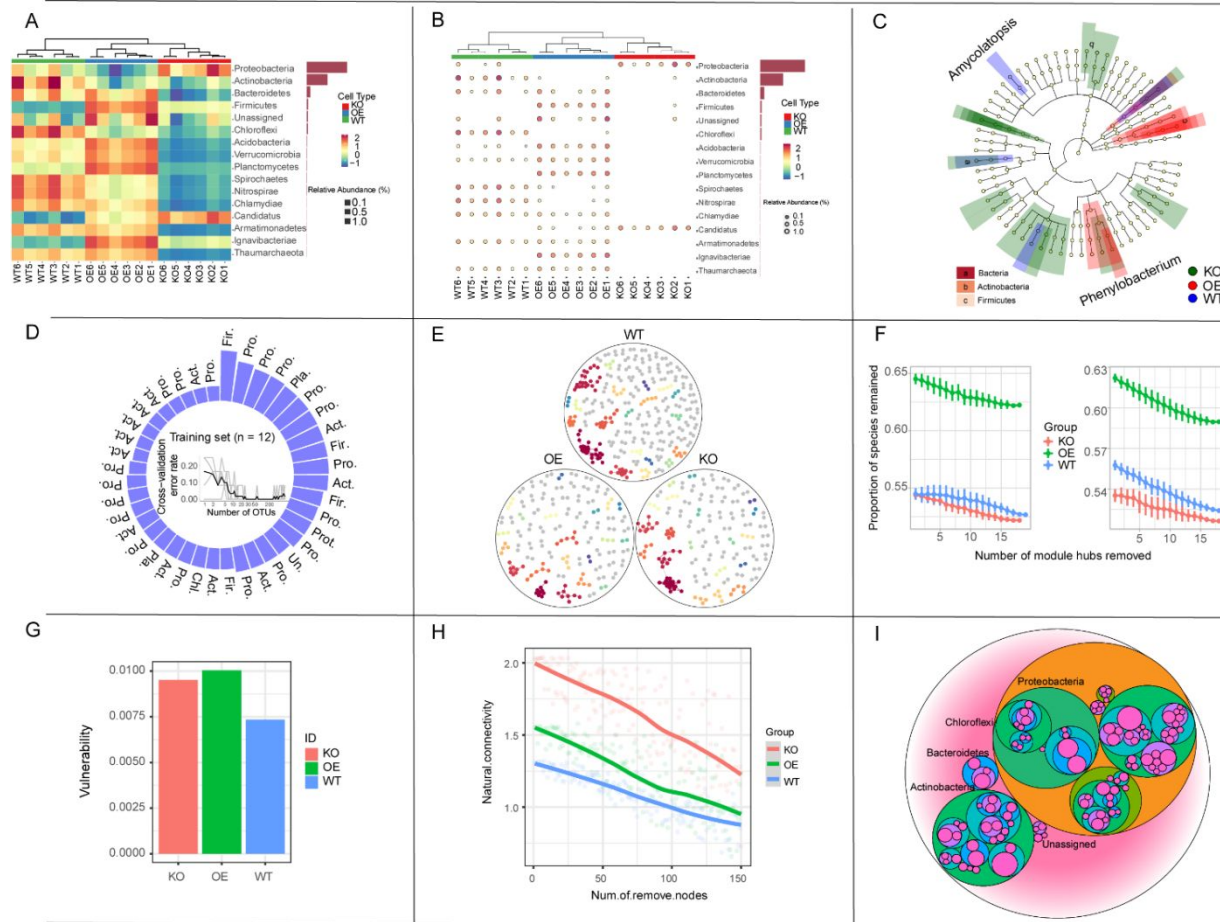

Fig. S12 Partial display of results from best practices in microbiome data analysis. (A-I) other microbiome analyses

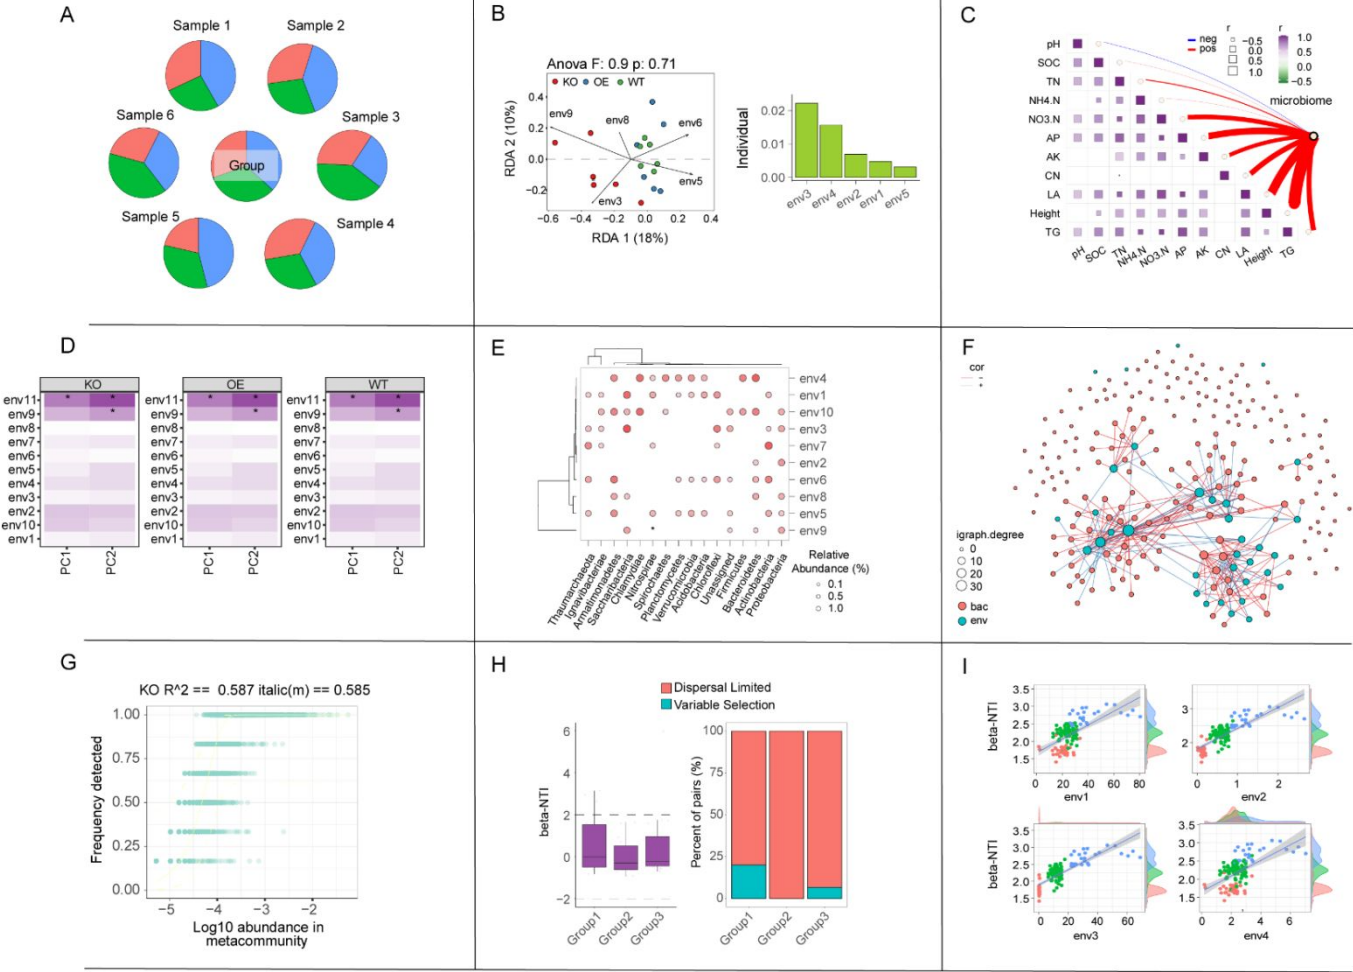



Sup. Table. Specific classification of 324 R packages in microbiome analysis.

| Package       | Classification           |
|---------------|--------------------------|
| abind         | Data cleaning            |
| ade4          | Diversity analysis       |
| agricolae     | Difference analysis      |
| AlgDesign     | Diversity analysis       |
| annotate      | Function prediction      |
| AnnotationDbi | Function prediction      |
| ape           | Diversity analysis       |
| aplot         | Visualization            |
| askpass       | Depended                 |
| assertthat    | Depended                 |
| backports     | Depended                 |
| base64enc     | Data cleaning            |
| bayesm        | Biomarker identification |
| BH            | Depended                 |
| Biobase       | Depended                 |
| BiocGenerics  | Depended                 |
| BiocManager   | Depended                 |
| BiocParallel  | Data cleaning            |
| BiocVersion   | Depended                 |
| biomformat    | Data cleaning            |
| Biostrings    | Depended                 |
| bit           | Diversity analysis       |
| bit64         | Data cleaning            |
| bitops        | Data cleaning            |
| blob          | Data cleaning            |
| brew          | Data cleaning            |
| brio          | Data cleaning            |
| broom         | Biomarker identification |
| bslib         | Depended                 |
| cachem        | Depended                 |
| callr         | Depended                 |
| car           | Depended                 |
| carData       | Depended                 |
| cellranger    | Depended                 |
| checkmate     | Depended                 |
| circlize      | Visualization            |
| classInt      | Depended                 |
| cli           | Depended                 |
| clipr         | Depended                 |

|    |                |                          |
|----|----------------|--------------------------|
| 1  |                |                          |
| 2  |                |                          |
| 3  |                |                          |
| 4  | clue           | Diversity analysis       |
| 5  | coda           | Data cleaning            |
| 6  | coin           | Difference analysis      |
| 7  | colorspace     | Visualization            |
| 8  | combinat       | Data cleaning            |
| 9  | commonmark     | Depended                 |
| 10 | compositions   | Diversity analysis       |
| 11 | corrplot       | Visualization            |
| 12 | cowplot        | Visualization            |
| 13 | cpp11          | Depended                 |
| 14 | crayon         | Visualization            |
| 15 | credentials    | Depended                 |
| 16 | crosstalk      | Visualization            |
| 17 | curl           | Depended                 |
| 18 | data.table     | Data cleaning            |
| 19 | data.tree      | Biomarker identification |
| 20 | DBI            | Depended                 |
| 21 | dbplyr         | Data cleaning            |
| 22 | DelayedArray   | Depended                 |
| 23 | deldir         | Visualization            |
| 24 | DEoptimR       | Depended                 |
| 25 | desc           | Depended                 |
| 26 | DESeq2         | Difference analysis      |
| 27 | devtools       | Depended                 |
| 28 | diffobj        | Visualization            |
| 29 | digest         | Depended                 |
| 30 | dirmult        | Depended                 |
| 31 | doParallel     | Depended                 |
| 32 | downlit        | Depended                 |
| 33 | dplyr          | Data cleaning            |
| 34 | dtplyr         | Data cleaning            |
| 35 | dynamicTreeCut | Diversity analysis       |
| 36 | e1071          | Biomarker identification |
| 37 | EasyStat       | Difference analysis      |
| 38 | edgeR          | Difference analysis      |
| 39 | ellipsis       | Depended                 |
| 40 | evaluate       | Depended                 |
| 41 | fansi          | Depended                 |
| 42 | farver         | Visualization            |
| 43 | fastcluster    | Diversity analysis       |
| 44 | fastmap        | Depended                 |
| 45 | fBasics        | Diversity analysis       |
| 46 | fontawesome    | Visualization            |
| 47 |                |                          |
| 48 |                |                          |
| 49 |                |                          |
| 50 |                |                          |
| 51 |                |                          |
| 52 |                |                          |
| 53 |                |                          |
| 54 |                |                          |
| 55 |                |                          |
| 56 |                |                          |
| 57 |                |                          |
| 58 |                |                          |
| 59 |                |                          |
| 60 |                |                          |

|                  |                          |
|------------------|--------------------------|
| forcats          | Data cleaning            |
| foreach          | Data cleaning            |
| formatR          | Depended                 |
| Formula          | Depended                 |
| fs               | Depended                 |
| fst              | Depended                 |
| fstcore          | Depended                 |
| futile.logger    | Depended                 |
| futile.options   | Depended                 |
| gargle           | Depended                 |
| genefilter       | Difference analysis      |
| geneplotter      | Function prediction      |
| generics         | Depended                 |
| GenomeInfoDb     | Depended                 |
| GenomeInfoDbData | Depended                 |
| GenomicRanges    | Function prediction      |
| gert             | Depended                 |
| ggalluvial       | Visualization            |
| ggClusterNet     | Network analysis         |
| ggforce          | Visualization            |
| ggfun            | Visualization            |
| ggnewscale       | Visualization            |
| ggplot2          | Visualization            |
| ggplotify        | Visualization            |
| ggpubr           | Visualization            |
| ggraph           | Visualization            |
| ggrepel          | Visualization            |
| ggsci            | Visualization            |
| ggsignif         | Visualization            |
| ggstance         | Visualization            |
| ggstar           | Visualization            |
| ggtern           | Visualization            |
| ggtree           | Visualization            |
| ggtreeExtra      | Visualization            |
| ggupset          | Visualization            |
| ggVennDiagram    | Visualization            |
| gh               | Depended                 |
| gitcreds         | Depended                 |
| glmnet           | Biomarker identification |
| GlobalOptions    | Data cleaning            |
| glue             | Depended                 |
| GO.db            | Function prediction      |
| googledrive      | Depended                 |

|    |               |                          |
|----|---------------|--------------------------|
| 1  |               |                          |
| 2  |               |                          |
| 3  | googlesheets4 | Depended                 |
| 4  | graphlayouts  | Visualization            |
| 5  | gridExtra     | Visualization            |
| 6  | gridGraphics  | Visualization            |
| 7  |               |                          |
| 8  |               |                          |
| 9  | gss           | Depended                 |
| 10 | gtable        | Visualization            |
| 11 | GUniFrac      | Diversity analysis       |
| 12 |               |                          |
| 13 | haven         | Depended                 |
| 14 | hexbin        | Visualization            |
| 15 | highr         | Depended                 |
| 16 |               |                          |
| 17 | Hmisc         | Data cleaning            |
| 18 | hms           | Depended                 |
| 19 | htmlTable     | Depended                 |
| 20 |               |                          |
| 21 | htmltools     | Depended                 |
| 22 | htmlwidgets   | Depended                 |
| 23 |               |                          |
| 24 | httpuv        | Depended                 |
| 25 | httr          | Depended                 |
| 26 | huge          | Data cleaning            |
| 27 |               |                          |
| 28 | ids           | Depended                 |
| 29 | igraph        | Network analysis         |
| 30 | impute        | Data cleaning            |
| 31 |               |                          |
| 32 | ini           | Depended                 |
| 33 | interp        | Depended                 |
| 34 | IRanges       | Function prediction      |
| 35 | isoband       | Depended                 |
| 36 |               |                          |
| 37 | iterators     | Depended                 |
| 38 | jpeg          | Visualization            |
| 39 | jquerylib     | Depended                 |
| 40 |               |                          |
| 41 | jsonlite      | Depended                 |
| 42 | KEGGREST      | Function prediction      |
| 43 |               |                          |
| 44 | klaR          | Biomarker identification |
| 45 | knitr         | Depended                 |
| 46 | labeling      | Depended                 |
| 47 | labelled      | Depended                 |
| 48 |               |                          |
| 49 | lambda.r      | Depended                 |
| 50 | later         | Depended                 |
| 51 | latex2exp     | Depended                 |
| 52 |               |                          |
| 53 | latticeExtra  | Visualization            |
| 54 | lazyeval      | Depended                 |
| 55 |               |                          |
| 56 | libcoin       | Depended                 |
| 57 | lifecycle     | Depended                 |
| 58 | limma         | Difference analysis      |
| 59 |               |                          |
| 60 | lme4          | Biomarker identification |

|                        |                          |
|------------------------|--------------------------|
| locfit                 | Depended                 |
| lubridate              | Depended                 |
| magrittr               | Depended                 |
| MatrixGenerics         | Biomarker identification |
| MatrixModels           | Biomarker identification |
| matrixStats            | Depended                 |
| memoise                | Depended                 |
| curatedMetagenomicData | Depended                 |
| MicrobiotaProcess      | Biomarker identification |
| mime                   | Depended                 |
| miniUI                 | Depended                 |
| minqa                  | Depended                 |
| mnormt                 | Diversity analysis       |
| modeest                | Biomarker identification |
| modelr                 | Biomarker identification |
| modeltools             | Biomarker identification |
| multcomp               | Difference analysis      |
| multcompView           | Difference analysis      |
| multtest               | Difference analysis      |
| munsell                | Visualization            |
| mvtnorm                | Difference analysis      |
| network                | Network analysis         |
| networkD3              | Network analysis         |
| nloptr                 | Depended                 |
| numDeriv               | Difference analysis      |
| openssl                | Depended                 |
| packcircles            | Network analysis         |
| patchwork              | Visualization            |
| pbkrtest               | Biomarker identification |
| permut                 | Difference analysis      |
| pheatmap               | Difference analysis      |
| picante                | Biomarker identification |
| pillar                 | Depended                 |
| pixmap                 | Visualization            |
| pkgbuild               | Depended                 |
| pkgconfig              | Depended                 |
| pkgdown                | Depended                 |
| pkgload                | Depended                 |
| plogr                  | Depended                 |
| plotly                 | Visualization            |
| plyr                   | Data cleaning            |
| png                    | Visualization            |
| polyclip               | Depended                 |

|    |                |                          |
|----|----------------|--------------------------|
| 1  |                |                          |
| 2  |                |                          |
| 3  | polynom        | Depended                 |
| 4  | praise         | Depended                 |
| 5  | preprocessCore | Depended                 |
| 6  | prettyunits    | Depended                 |
| 7  | processx       | Depended                 |
| 8  | profvis        | Visualization            |
| 9  | progress       | Depended                 |
| 10 | promises       | Depended                 |
| 11 | proto          | Depended                 |
| 12 | proxy          | Depended                 |
| 13 | ps             | Visualization            |
| 14 | psych          | Network analysis         |
| 15 | pulsar         | Visualization            |
| 16 | purrr          | Data cleaning            |
| 17 | quantreg       | Difference analysis      |
| 18 | questionr      | Data cleaning            |
| 19 | R.cache        | Depended                 |
| 20 | R.methodsS3    | Depended                 |
| 21 | R.oo           | Depended                 |
| 22 | R.utils        | Depended                 |
| 23 | R6             | Depended                 |
| 24 | ragg           | Visualization            |
| 25 | randomForest   | Biomarker identification |
| 26 | SIAMCAT        | Biomarker identification |
| 27 | rappdirs       | Depended                 |
| 28 | rcmdcheck      | Depended                 |
| 29 | RColorBrewer   | Visualization            |
| 30 | Rcpp           | Depended                 |
| 31 | RcppArmadillo  | Depended                 |
| 32 | RcppEigen      | Depended                 |
| 33 | RCurl          | Depended                 |
| 34 | readr          | Data cleaning            |
| 35 | readxl         | Data cleaning            |
| 36 | rematch        | Depended                 |
| 37 | rematch2       | Depended                 |
| 38 | remotes        | Depended                 |
| 39 | reprex         | Depended                 |
| 40 | reshape2       | Data cleaning            |
| 41 | rgexf          | Visualization            |
| 42 | rhdf5          | Depended                 |
| 43 | rhdf5filters   | Depended                 |
| 44 | Rhdf5lib       | Depended                 |
| 45 | rlang          | Depended                 |
| 46 |                |                          |
| 47 |                |                          |
| 48 |                |                          |
| 49 |                |                          |
| 50 |                |                          |
| 51 |                |                          |
| 52 |                |                          |
| 53 |                |                          |
| 54 |                |                          |
| 55 |                |                          |
| 56 |                |                          |
| 57 |                |                          |
| 58 |                |                          |
| 59 |                |                          |
| 60 |                |                          |

|                      |                          |
|----------------------|--------------------------|
| rmarkdown            | Depended                 |
| rmutil               | Biomarker identification |
| robustbase           | Biomarker identification |
| roxygen2             | Depended                 |
| rprojroot            | Depended                 |
| RSQLite              | Depended                 |
| rstatix              | Difference analysis      |
| rstudioapi           | Depended                 |
| RVenn                | Visualization            |
| rversions            | Depended                 |
| rvest                | Depended                 |
| s2                   | Depended                 |
| S4Vectors            | Depended                 |
| sandwich             | Difference analysis      |
| sass                 | Depended                 |
| scales               | Visualization            |
| selectr              | Depended                 |
| servr                | Depended                 |
| sessioninfo          | Depended                 |
| sf                   | Depended                 |
| shape                | Visualization            |
| shiny                | Depended                 |
| sna                  | Network analysis         |
| snow                 | Network analysis         |
| sourcetools          | Depended                 |
| sp                   | Visualization            |
| SparseM              | Depended                 |
| SpiecEasi            | Network analysis         |
| stable               | Difference analysis      |
| stabledist           | Difference analysis      |
| statip               | Difference analysis      |
| statmod              | Biomarker identification |
| statnet.common       | Depended                 |
| stringi              | Data cleaning            |
| stringr              | Data cleaning            |
| styler               | Depended                 |
| SummarizedExperiment | Data cleaning            |
| sys                  | Depended                 |
| systemfonts          | Depended                 |
| Tax4Fun2             | Function prediction      |
| tensorA              | Depended                 |
| testthat             | Depended                 |
| textshaping          | Visualization            |

|    |            |                     |
|----|------------|---------------------|
| 1  |            |                     |
| 2  |            |                     |
| 3  |            |                     |
| 4  | TH.data    | Depended            |
| 5  | tibble     | Depended            |
| 6  | tidyfst    | Data cleaning       |
| 7  | tidygraph  | Visualization       |
| 8  | tidyr      | Data cleaning       |
| 9  |            |                     |
| 10 | tidyselect | Depended            |
| 11 | tidytree   | Diversity analysis  |
| 12 |            |                     |
| 13 | tidyverse  | Data cleaning       |
| 14 | timechange | Depended            |
| 15 | timeDate   | Depended            |
| 16 |            |                     |
| 17 | timeSeries | Depended            |
| 18 | tinytex    | Depended            |
| 19 | treeio     | Diversity analysis  |
| 20 |            |                     |
| 21 | tweenr     | Visualization       |
| 22 | tzdb       | Depended            |
| 23 |            |                     |
| 24 | units      | Depended            |
| 25 | urlchecker | Depended            |
| 26 | vegan      | Diversity analysis  |
| 27 | VGAM       | Difference analysis |
| 28 |            |                     |
| 29 | vroom      | Data cleaning       |
| 30 | waldo      | Difference analysis |
| 31 | WGCNA      | Network analysis    |
| 32 | adespatial | Diversity analysis  |
| 33 | minpack.lm | Other analysis      |
| 34 | eulerr     | Other analysis      |
| 35 |            |                     |
| 36 | FSA        | Other analysis      |
| 37 |            |                     |
| 38 | stats4     | Other analysis      |
| 39 |            |                     |
| 40 |            |                     |
| 41 |            |                     |
| 42 |            |                     |
| 43 |            |                     |
| 44 |            |                     |
| 45 |            |                     |
| 46 |            |                     |
| 47 |            |                     |
| 48 |            |                     |
| 49 |            |                     |
| 50 |            |                     |
| 51 |            |                     |
| 52 |            |                     |
| 53 |            |                     |
| 54 |            |                     |
| 55 |            |                     |
| 56 |            |                     |
| 57 |            |                     |
| 58 |            |                     |
| 59 |            |                     |
| 60 |            |                     |



**Running title:** Using R language in microbiome analysis

## REVIEW

# The best practice for microbiome analysis using R

Tao Wen<sup>1,2, ‡</sup>, Guoqing Niu<sup>2, ‡</sup>, Tong Chen<sup>3</sup>, Qirong Shen<sup>2</sup>, Jun Yuan<sup>2,\*</sup>, Yong-Xin Liu<sup>1,\*</sup>

<sup>1</sup> Shenzhen Branch, Guangdong Laboratory of Lingnan Modern Agriculture, Genome Analysis Laboratory of the Ministry of Agriculture and Rural Affairs, Agricultural Genomics Institute at Shenzhen, Chinese Academy of Agricultural Sciences, Shenzhen 518120, China

<sup>2</sup> The Key Laboratory of Plant Immunity Jiangsu Provincial Key Lab for Organic Solid Waste Utilization Jiangsu Collaborative Innovation Center for Solid Organic Waste Resource Utilization, National Engineering Research Center for Organic-based Fertilizers, Nanjing Agricultural University, Nanjing 210095, China

<sup>3</sup> National Resource Center for Chinese Materia Medica, China Academy of Chinese Medical Sciences, Beijing 100700, China

‡These authors contributed equally to this work

\*Correspondence: [junyuan@njau.edu.cn](mailto:junyuan@njau.edu.cn) (J. Yuan), [liuyongxin@caas.cn](mailto:liuyongxin@caas.cn) (Y.-X. Liu)

## ORCIDs

Tao Wen: <https://orcid.org/0000-0003-0102-0487>

Guoqing Niu: <https://orcid.org/0009-0007-4100-8470>

Tong Chen: <https://orcid.org/0000-0003-3134-3113>

Qirong Shen: <https://orcid.org/0000-0002-5662-9620>

Jun Yuan: <https://orcid.org/0000-0002-8265-0239>

Yong-Xin Liu: <https://orcid.org/0000-0003-1832-9835>

## Abstract

With the gradual maturity of sequencing technology, many microbiome studies have published, driving the emergence and advance of related analysis tools. R language is the widely used platform for microbiome data analysis for powerful functions. However, tens of thousands of R packages and numerous similar analysis tools have brought major challenges for many researchers to explore microbiome data. How to choose suitable, efficient, convenient, and easy-to-learn tools from the numerous R packages has become a problem for many microbiome researchers. We have organized 324 common R packages for microbiome analysis and classified them according to application categories (diversity, difference, biomarker, correlation and network, functional prediction, and others), which could help researchers quickly find relevant R packages for microbiome analysis. Furthermore, we systematically sorted

1  
2  
3 the integrated R packages (phyloseq, microbiome, MicrobiomeAnalystR,  
4 Animalcules, microeco, and amplicon) for microbiome analysis, and summarized the  
5 advantages and limitations, which will help researchers choose the appropriate tools.  
6 Finally, we thoroughly reviewed the R packages for microbiome analysis,  
7 summarized most of the common analysis content in the microbiome, and formed the  
8 most suitable pipeline for microbiome analysis. This paper is accompanied by  
9 hundreds of examples with 10,000 lines codes in GitHub, which can help beginners to  
10 learn, also help analysts compare and test different tools. This paper systematically  
11 sorts the application of R in microbiome, providing an important theoretical basis and  
12 practical reference for the development of better microbiome tools in the future. All  
13 the code is available at GitHub.

14  
15  
16  
17 **Keywords** R package, microbiome, data analysis, visualization, amplicon,  
18 metagenome  
19

## 20 21 **Introduction**

22  
23 The metagenomic analysis is used to study microbial diversity, structure, and function  
24 by sequencing, quantifying, annotating, and analyzing DNA and/or RNA sequences  
25 of microbial communities or microbiota. The commonly used high-throughput  
26 sequencing technology in microbiome research is mainly known as amplicon  
27 sequencing and shotgun metagenomic sequencing. Amplicon sequencing with the  
28 advantages of low cost, mature analysis system, and simple analysis process was  
29 widely used in microbiome research. Shotgun metagenomic sequencing provided the  
30 functional information of microbes and more accurate information on the microbial  
31 composition with the higher sequencing cost and large amount of computational  
32 resources needed. The detail pipeline for both sequencing have been systemically  
33 summarized in our previous review (Liu et al., 2021). As an important component of  
34 biodiversity, microbial communities play a vital role in biology, ecology,  
35 biotechnology, agriculture, and medicine. Various bioinformatics methods are  
36 required for microbial community analysis, which mainly includes three parts: 1) data  
37 preprocessing, 2) quantification and annotation, and 3) statistics and visualization  
38 (Fig. 1A). In the preprocessing step, the raw data is filtered and quality controlled to  
39 ensure data quality. In the quantification and annotation step, tools and databases are  
40 used to identify microbial representative sequences and annotate microbial taxonomy  
41 and function. The first two parts of microbial community analysis have been well  
42 discussed and could be well done according to our previous papers (Liu et al., 2023).  
43 Finally, in the statistics and visualization step, various statistical methods are used to  
44 explore microbial community diversity, structure, and potential functions.

45  
46 With the development of high-throughput sequencing technology, plenty of  
47 studies were performed with amplicon-sequencing technology (Thompson et al.,  
48 2017; Proctor et al., 2019) and shotgun metagenomes sequencing (Carrión et al.,  
49 2019; Li et al., 2022; Paoli et al., 2022), which led to the development of microbiome  
50 analysis methodologies, software, and pipelines, e.g., QIIME (Caporaso et al., 2010),  
51 Mothur (Schloss et al., 2009), USEARCH (Edgar, 2010), VSEARCH (Rognes et al.,  
52 2016), QIIME 2 (Bolyen et al., 2019) , Parallel-Meta Suite (Chen et al., 2022),  
53  
54  
55  
56  
57  
58  
59  
60

1  
2  
3 EasyAmplicon (Liu et al., 2023), Kraken (Wood and Salzberg, 2014), MEGAN  
4 (Huson et al., 2007), MetaPhlan2 (Truong et al., 2015), HUMAnN2 (Franzosa et al.,  
5 2018) etc. As the most crucial and basic procedure for amplicon sequencing data  
6 analysis, OTU (Operational taxonomic unit) clustering method was popular before the  
7 year of 2015 while non-clustering methods were gradually developed and widely used  
8 recently. Currently, the common non-clustering methods include DADA2 (Callahan  
9 et al., 2016), deblur (Amir et al., 2017), unoise3 (Edgar and Flyvbjerg, 2015). One of  
10 the most representative non-clustering algorithms among them is DADA2, which was  
11 created with R language. It makes the R language (Ihaka and Gentleman, 1996)  
12 occupy an important position in raw data processing for amplicon sequencing.  
13 Compared with many software that can be used in upstream steps of microbiota  
14 sequencing data analysis, the downstream analysis steps rely on the R language  
15 heavily with various packages. These analyses mainly include: 1) Diversity analysis;  
16 2) Difference analysis; 3) Correlation and network analysis; 4) Biomarker  
17 identification; 5) Functional predictions; 6) Integrative analysis of microbial  
18 communities with other indicators (including phylogenetic analysis, multi-omics  
19 integration, and environmental factor analysis, etc.). In addition to the kinds of  
20 multivariate statistical analysis that can be done in R, there are diversified  
21 data-cleaning packages that allow data to be transformed among different analyses.  
22

23  
24 R is a free, open-source language and environment for data statistical analysis  
25 and visualization, which was created by Ross Ihaka and Robert Gentleman from the  
26 University of Auckland in New Zealand and now is responsible by the “R  
27 Development Core Team”. Compared with other analysis tools, such as SPSS,  
28 MINITAB, MATLAB, which are more suitable for the statistics of processed and  
29 standardized data, R language can handle processed data as well as raw data. R can  
30 easily implement almost all analysis methods, many of the latest methods or  
31 algorithms were first exhibited in it. Furthermore, R shows excellent data  
32 visualization, particularly for complex data. The powerful and flexible interactive  
33 analysis is also an advantage of R, meanwhile enabling visual data exploration. The  
34 functionality of the R language relies heavily on thousands of R packages, which  
35 provide a wide variety of data processing and analysis strategies, allowing almost any  
36 data analysis process to be done in R. The total number of R packages published on  
37 CRAN is 18,981, and Bioconductor is 2,183 (by January 31, 2023). These packages  
38 demonstrated the powerful data process and analysis performance of R.  
39

40  
41 In recent years, numerous R packages have been developed on the R platform for  
42 the downstream analysis of microbiome, which have made important contributions to  
43 the associated-research field. However, the increasing number of downstream analysis  
44 R packages has reached a dizzying level (Fig. 1B). In addition, integrated R packages  
45 containing a large amount of microbiome analysis content, such as phyloseq  
46 (McMurdie and Holmes, 2013), microeco (Liu et al., 2020), and amplicon (Liu et al.,  
47 2023), have gradually emerged. This abundance of R packages provides microbiome  
48 analysts with more choices, but also makes it difficult to identify the most suitable  
49 tools among many similar analysis tools. Furthermore, this plethora of R packages  
50 make it difficult for beginners to embark on a well-organized learning path for  
51  
52  
53  
54  
55  
56  
57  
58  
59  
60

1  
2  
3 microbiome analysis. Therefore, it is urgent to compare similar analysis functions,  
4 and extract the similarities and differences functions, to select the best process for  
5 microbiome analysis and help beginners learn more effectively.  
6

7 This paper attempts to sort and run the 324 common R packages (Fig. S1),  
8 especially the integrated R packages for microbiome analysis, and complete the  
9 following three parts: 1) compare different R package analysis processes according to  
10 the functional categories of microbiome analysis, analyze the results, and summarize  
11 example code; 2) organize the content of six integrated R packages according to the  
12 functional categories of microbiome analysis, compare the analysis results, and  
13 generate example code; 3) based on all R packages, select the optimal analysis  
14 approach using R language and provide example code for reference and learning to  
15 researchers.  
16  
17  
18  
19  
20

## 21 **Preparing microbiome data analysis**

22  
23 Downstream analysis of microbiome requires the preparation of five data files,  
24 including a feature table, a feature annotation file, a sample metadata file, a  
25 phylogenetic tree, and representative sequences. For beginners, it is important to  
26 understand the format and basic data structure of these files and learn how to import  
27 these files into R language. Furthermore, different analytical contents often have  
28 different requirements for data, and it is necessary to learn some data manipulation  
29 skills to meet the demands of various functions. Finally, it is necessary to learn the  
30 basics of R plotting to facilitate the presentation of results.  
31  
32  
33

### 34 **Data preparation and cleaning**

35  
36 After the process of sequence data preprocessing, quantification, and annotation,  
37 we need to further analysis the output files, including importing these files, cleaning  
38 data, and converting format, which required for subsequent microbiome analysis in R.  
39 Before statistical analysis, we must master the basic procedure of R language to cope  
40 with the data input requirements of different packages. This section includes:  
41 importing, organizing, filtering, basic calculations, conversion, normalization, and  
42 modification of data. Five data forms are frequently used from raw data processing,  
43 including feature tables (file formats are .csv/.txt/.xlsx/.biom, typically used  
44 taxonomic and functional tables, including  
45 OTU/ASV/taxonomy/gene/module/pathway tables), feature annotation  
46 (.csv/.txt/.xlsx/.biom), sample metadata (.csv/.txt), evolutionary/phylogenetic trees  
47 (.nwk/.tree), representative sequences (.fasta/.fas/.fa). All the data cleaning-related  
48 packages show in Fig. 1C. Tabular data input for microbial community is primarily  
49 accomplished using functions such as *read.table()*, *read.delim()*, and *read.csv()* in the  
50 *utils* package (Code 1A, script in GitHub). The reading of evolutionary tree files  
51 depends on functions like *read.tree()* in the *ape/ggtree/treeio* package, or *read\_tree()*  
52 in the *phyloseq* package. For reading representative sequence files in microbiome, the  
53 *readDNAStringSet()* in the *Biostrings* package (Pages et al., 2016) is typically used.  
54  
55  
56  
57  
58  
59  
60 Currently, big data integration of microbiome has become a trend, and leading to the

1  
2  
3 emergence of R packages for integrated data from multiple studies, likes  
4 curatedMetagenomicData (Pasolli et al., 2017). The package only needs to import the  
5 package and could re-analysis the curated data, rather than input in raw sequencing  
6 data.  
7

8 The basic idea of data organization can be summarized as three steps: splitting  
9 the data, processing with functions, and combining the output results into the desired  
10 format. The functions of basic packages in R can be combined to meet most  
11 requirements of the microbiome data operations. For example, the “for loop”  
12 combined with the basic statistical functions [*sum()*, *mean()*, *sd()*, etc.] can be used to  
13 perform basic statistical analysis and data transformations for microbial relative  
14 abundance (Code 1B); the base package provides the apply family of functions,  
15 including *apply()*, *sapply()*, *lapply()*, *tapply()*, *aggregate()*, etc., which can be applied  
16 to quickly complete the three stages of data processing. The apply family of functions  
17 provides a framework that acts as an alternative to “for loop” and is much faster than  
18 the basic “for loop” function in R (Code 1B). A similar purr package can be used in  
19 place of “for loop” to perform efficient operations.  
20

21 The plyr (Wickham, 2011b) package was upgraded from package of base with a  
22 variety of data sorting processes for kinds of data frames, lists, etc. The plyr package  
23 provides three data processing stages “Split–Apply–Combine” in one function, and  
24 the plyr package implements grouping transformations between R types (vector, list,  
25 and data frame) and basically replaces the apply family of functions in the base  
26 package. It can easily handle grouping calculations, e.g., microbial abundance at  
27 different taxonomy levels (Code 1C). The reshape2 (Wickham, 2007) package  
28 provides the long-wide format transformation during data processing, and since  
29 ggplot2 (Wickham, 2011a) plotting functions and most modeling functions, such as  
30 *lm()*, *glm()*, *gam()*, often use long data, microbiome data are general showed as wide  
31 form, so the transformation of microbiome data for plotting can be done using  
32 reshape2 (Code 1D), which provides the long-wide format transformation during data  
33 processing.  
34

35 The dplyr package is a member of the tidyverse family, innovatively abandoning  
36 the common form of data preservation in R rather than using the tibble format (more  
37 powerful than data.frame format) for data processing, which can more efficiently  
38 complete the data frame selection, merging and statistics within row and column, and  
39 data frame length and width format changes, the “%>%” pipeline symbol can be used  
40 to complete more complex data processing. The tibble format can store data during  
41 the analysis and modeling process, which is important for data analysis. For example,  
42 we demonstrated the use of dplyr and pipeline to run random forest modeling and the  
43 selection process of important variables (Code 1E).  
44

## 45 **Visualization in R language**

46 In most cases, we are used to plotting standard graphs in microbiome data display  
47 such as alpha/beta diversity, taxonomic composition. All the visualization-related  
48 packages show in Fig. 1C. Due to the widespread use of ggplot2 (Code 2A), many  
49  
50  
51  
52  
53  
54  
55  
56  
57  
58  
59  
60

1  
2  
3  
4  
5  
6  
7  
8  
9  
10  
11  
12  
13  
14  
15  
16  
17  
18  
19  
20  
21  
22  
23  
24  
25  
26  
27  
28  
29  
30  
31  
32  
33  
34  
35  
36  
37  
38  
39  
40  
41  
42  
43  
44  
45  
46  
47  
48  
49  
50  
51  
52  
53  
54  
55  
56  
57  
58  
59  
60

extension packages have emerged to extend based on ggplot2 with a high capacity of plotting styles, colors, and themes. These packages mainly include ggtern plotting ternary graphs in Code 2B (Hamilton and Ferry, 2018), ggraph plotting network graphs in Code 2C (Si et al., 2022), ggtree plotting evolutionary tree or cladogram in Code 2D (Xu et al., 2022), the ggalluvial package, the ggVennDiagram package (Code 2E), the ggstatsplot package plotting pie chart, and the ggpubr package providing many various themes and colors of output. In addition, the pheatmap and ComplexHeatmap package (Gu, 2022) based on the grid mapping system plots the relative abundance of features in different samples (Code 2F), the VennDiagram package (Chen and Boutros, 2011) could show the number of features in different samples. The UpSetR package (Conway et al., 2017), which draws Upset view is a new form plotting similar to Venn diagram. The base-based plotting system is complex and difficult to learn, while it is a good choice for complex graph drawing, such as the circlize (Gu et al., 2014) package (Code 2G), which draws chord diagrams composed of microbiota.

Additionally, there is often a lot of microbiome mapping work that involves a combination of graphics. At present, many tools in R can combine graphics, such as cowplot, patchwork, and aplot. The patchwork package has the most powerful functions and supports modular splicing graphics (Code 2H).

## Microbial community analysis

We have categorized the analysis of microbiome data into the following six major types in Fig. 1D: diversity analysis, difference analysis, biomarkers identification, correlation and network analysis, functional prediction, and other microbiome analyses (including source tracking analysis, community assembly processes, and analysis of associations between microbiota and environmental factors). Then, we would have organized, compared, and summarized all relevant R packages.

### Diversity analysis

Microbial community diversity mainly includes alpha diversity (Richness, Shannon, Simpson, Chao1, ACE, etc.), rarefaction curve, beta diversity (ordination and clustering analysis), taxonomic or functional composition. Here must introduce the package vegan (Oksanen et al., 2007), an abbreviation for Vegetation Analysis, written by nine quantitative ecologists, including Oksanen from Finland, which is initially used for specific dealing with data on community ecology. The package provides a variety of methods for data standardization and transformation. For example, data used for alpha diversity analysis can be normalized at the same sequencing depth with *rrarefy()*, and data for ordination analysis can be normalized with the *decostant()* (Code 3A). After the sequencing data are sampling normalization, diversity calculation can be more reasonable. In addition, alpha diversity metrics calculation can also be carried out with the *ade4* (Dray and Dufour, 2007), *adespatial* (Dray et al., 2018), and *picante* packages (Kembel et al., 2010). For example, phylogenetic diversity can be calculated using the *pd()* in the *picante*

package (Code 3A). Vegan not only allows for alpha diversity analysis, but also provides functions such as *rda()* for conducting principal components analysis (PCA) and redundancy analysis (RDA), *cca()* for conducting correspondence analysis (CA) and canonical correspondence analysis (CCA), *decorana()* for conducting decision curve analysis (DCA), and *metaMDS()* for conducting non-metric multidimensional scaling (NMDS) for microbiome ordination analysis (Code 3B). The *prcom()* in stats package can be used for principal component analysis (PCA), which is a kind of dimension reduction analysis. The *mca()* provided by the MASS package and the *MCA()* provided by the FactoMineR package can be used for multiple correspondence analysis (Code 3B); the ape package provides the *pcoa()* function for principal coordinate analysis (PCoA); the MASS package provides *lda()* for linear discriminant analysis (LDA, Code 3C). Before running many ordination operations, it is often necessary for community clustering. The *vegdist()* in the vegan package can calculate euclidean, manhattan, bray, canberra, and other distances (Code 3B). In addition, distance calculation can also be done using *dist()* of stats package. The distance matrix can be used for clustering analysis in addition to ordination analysis. The *hclust()* in the stats package can be used for clustering analysis, a similar function can be achieved with the facteoextra, kmeans packages (Code 3D). Microbial composition analysis mainly used to display the abundance of microbes, and the dplyr package is needed to organize the data then display with ggplot2 subsequently.

## Difference analysis

Difference analysis is divided into community-level analysis and feature-level (any hierarchy of taxonomy and function) analysis. Community-level difference analysis is mainly performed with functions including *adonis()*, *anosim()*, and *mrpp()* in vegan package, and *mantel.test()* in ape package (Code 4A). The R package for compositional data difference analysis in the feature level can utilize the *wilcox.test()* (Code 4B) and *t.test()* (Code 4C) in the stats package. Subsequently, data correction algorithms were developed specifically for sequencing data, such as the upper quartile (UQ), trimmed mean of M-values (TMM) (Code 4C), and relative log expression (RLE) harbored in the edgeR package (Robinson et al., 2009) (Code 4D). Median of ratios method (MED) in DESeq2 package (Love et al., 2014) (Code 4E), and cumulative-sum scaling (CSS) algorithm in metagenomeSeq (<https://github.com/sirusb/metagenomeSeq>) package (Code 4F). Furthermore, the ALDEx2 package provides polynomial models which can be used to infer feature abundance and calculate feature differences with non-parametric tests, t-tests, or generalized linear models (Code 4G). The ANCOM-BC package attempts to address sample heterogeneity by correcting bias with a log-linear model. In addition, other R packages for microbiome data correction and difference tests include limma (Code 4H), DR, ANCOM (Lin and Peddada, 2020) (Code 4I), corncob (Code 4J), Maaslin2 (Code 4K), etc. Nearing et al. (2022) showed that they compared these difference analysis methods and proposed that ALDEx2 and ANCOM-II (anchom\_v2.1.R, Code 4L) were the best performers in the difference analysis of microbial communities. As for the significance test, different packages use different methods for significance

1  
2  
3 testing. For example, Fisher test was used in edgeR package; Wald test was used in  
4 DESeq2 and corncob package; t-test was used in limma package. There was other  
5 method for significance test, likes Wilcoxon rank-sum test (ALDEx2 and  
6 ANCOM-II), ANOVA (Maaslin2) etc.  
7  
8

## 9 **Biomarker identification**

10  
11 Characteristic microbial consortia were explored to explain certain questions, such as  
12 the biomarkers of the gut in obese or hypertensive populations, or of soil in Fusarium  
13 wilt develops, etc. Microbes selected through difference analysis are often unable to  
14 determine whether they represent the main differences of concern. Therefore, weight  
15 analysis or machine learning methods are used to further distinguish the feature  
16 microbes.  
17  
18

19 The main ones commonly used for weighted analysis are linear discriminant  
20 analysis effect size (LEfSe), PCA, etc (Code 5A). LEfSe is developed specifically for  
21 microbiome data, and the core functionality is implemented using the packages LDA  
22 (Fisher, 1936) and MASS (Ripley et al., 2013). By extracting the loading matrix of  
23 PCA ordination, the microbiome with the greatest impact on the sample variation are  
24 found as biomarkers (Code 5B).  
25  
26

27 In terms of machine learning, the random forest model, which is widely used in  
28 microbiome analysis, is implemented by using the randomforest package (Liaw and  
29 Wiener, 2002) (Code 5C). There are many other decision tree-based machine learning  
30 models, such as the mboost (Hofner et al., 2014) package provides boosting-based  
31 algorithms, the e1071 (Dimitriadou et al., 2008) package provides support vector  
32 machines *svm()* in Code 5D, and plain Bayes *naiveBayes()*. The xgboost package can  
33 integrate many tree models together to form a strong classifier, which can prevent  
34 overfitting via many strategies, including regularization terms, shrinkage, and column  
35 subsampling, etc. In addition, the pROC (Robin et al., 2011) package is used to plot  
36 the operating characteristic curve (ROC, Code 5D) to evaluate the efficiency of  
37 machine learning models. The Caret package provides cross-validation to determine  
38 the number of features (Kuhn, 2008). Currently, Jakob et al (2021) developed an  
39 open-source R package SIAMCAT, a powerful yet user-friendly computational  
40 machine learning toolkit tailored to the characteristics of microbiome data.  
41  
42  
43  
44

## 45 **Correlation and network analysis**

46  
47 Microbial co-occurrence network analysis is used to find microbial modules that may  
48 have mutualistic relationships. Co-occurrence network analysis mainly includes the  
49 calculation of correlations, network visualization, and the calculation of network  
50 properties. The common R packages for calculation of correlations are psych (Revelle  
51 and Revelle, 2015) (Code 6A), WGCNA (Langfelder and Horvath, 2008) (Code 6B),  
52 Hmisc (Harrell Jr and Harrell Jr, 2019) (Code 6C), and SpiecEasi (Kurtz et al., 2015)  
53 (Code 6D). Among these R packages, WGCNA has the highest calculation speed,  
54 while requiring additional p-value correction; psych can calculate correlation with  
55 correct p-value, but the speed is very low; the SpiecEasi package can [use](#) the sparcc  
56 method to perform a more suitable method for microbiome data to calculate the  
57  
58  
59  
60



1  
2  
3 correlation matrix, and can call multiple-threads to accelerate the calculation. R  
4 packages for network visualization and attribute calculation can use igraph (Code 6E),  
5 network, and ggraph packages (Code 6F). These R packages contain many layout  
6 algorithms for network visualization. In addition, network packages combined with  
7 ggplot2 to visualize the network are easier to modify. Sna and ggraph packages have  
8 many visualization layout algorithms to increase the styles of network visualization.  
9  
10 With the increasing use of network analysis in the microbiome analysis, more  
11 attention is paid to network modularity and the key groups through network modules.  
12 The WGCNA package provides a complete framework to quickly complete the  
13 correlation calculation, network module calculation, module feature vector  
14 calculation, and other network properties exploration. The recent development of the  
15 ggClusterNet (Wen et al., 2022) package (Code 6G) provides a unified framework for  
16 microbiome networks and designs a variety of unique module-based visualization  
17 algorithms to visualize the module relationships in the network.  
18  
19  
20  
21

## 22 **Functional prediction**

23  
24 The Tax4Fun (Abhauer et al., 2015) R package (Code 7A) for functional prediction of  
25 16S rDNA has been developed to more accurately predict changes in microbial  
26 community function using amplicon data. The package has been updated to Tax4Fun2  
27 (Wemheuer et al., 2020). Microeco can implement FAPROTAX (Louca et al., 2016)  
28 prediction for bacteria/archaea and FUNGuild (Nguyen et al., 2016) prediction for  
29 fungi, which is based on the database of taxonomic functional description from  
30 curated published papers. Functional prediction enables the prediction of microbial  
31 community function and subsequent statistical analysis. Additionally, vegan can be  
32 used for diversity analysis, while edgeR, DEseq2, and limma packages can be used  
33 for difference analysis. For functional enrichment, the clusterProfiler (Code 7B)  
34 package can perform GO, KEGG, GSEA and GSVA enrichment, which considers  
35 gene/pathway abundance and is recommended. Furthermore, the clusterProfiler  
36 package provides plot functions based on the ggplot syntax, allowing to plot  
37 appealing graphics in a simple manner. Gene/~~pathway~~-Pathway network analysis can  
38 be performed using WGCNA for calculation, and ggClusterNet for network parameter  
39 calculation and visualization. However, the reliability of functional prediction results,  
40 particularly for environmental samples, is currently disputed, and therefore, further  
41 verification of analysis results is often required.  
42  
43  
44  
45  
46  
47

## 48 **Other microbiome analysis**

49  
50 Analysis for microbial community formation process commonly used in the  
51 framework proposed by Stegen et al. (2013) to calculate  $\beta$ NTI and RC-Bray indices  
52 with R packages minpack.lm, picante, Hmisc, eulerr, FSA, ape, stats4, and others  
53 (Code 8A). Ning et al. (2020) used a phylogenetic binning-based null model analysis  
54 to infer quantitative mechanisms underlying community assembly, and developed the  
55 R package iCAMP (Code 8B). It allows for the quantitative assessment of the relative  
56 importance of different ecological processes (e.g., homogenizing selection,  
57 heterogenizing selection, dispersal, and drift) on both the entire community and each  
58  
59  
60

1  
2  
3 phylogenetic bin (which is usually composed of taxa from a single family or order  
4 with distinct ecological characteristics). In addition, the package also provides neutral  
5 theory models, phylogenetic and taxonomic null model analyses at both the  
6 community and clade levels, calculation of niche differences and phylogenetic  
7 distances between clades, and tests for phylogenetic signals within individual  
8 phylogenetic bins.  
9

10  
11 Microbial communities were often used to analyze the correlation with  
12 environment indicators, for example, *mantel.test()* provided by the *vegan* package was  
13 used to examine the correlation between microbial communities and environment  
14 indicators, and using *wascores()*, *mantel.correlog()* to detect the phylogenetic signal  
15 between microbial communities and environmental factors (Code 8C). In addition, the  
16 *ggClusterNet* package can be used to calculate the co-occurrence relationships  
17 between microbes/microbiome and environmental factors, and generated  
18 publish-ready figures (Code 8D).  
19

20  
21 Knights et al. (2011) proposed the microbiome traceability tool source tracker in  
22 R language. Metcalf et al. (2016) predicted the time of death and tracked the source  
23 microbes of real cadavers on microbial communities, then microbial traceability  
24 analysis gradually popular. Shenhav et al. (2019) proposed a new algorithm in R,  
25 FEAST (Code 8E), which makes microbial traceability analysis more efficient, faster,  
26 and with low false positives.  
27  
28  
29  
30

## 31 Integrated R packages for microbiome

32  
33 As microbiome sequencing becomes more popular, R packages dedicated to  
34 microbiome data processing are gradually emerging (Fig. 2). McMurdie and Holmes  
35 (2013) developed the *phyloseq* package: a comprehensive tool for microbiome data  
36 (including feature tables, phylogenetic trees, and feature annotation) clustering,  
37 integrating data import, storage, analysis, and output. The package utilizes many tools  
38 in R for ecological and phylogenetic analyses (*vegan*, *ade4*, *ape*, and *picante*) and uses  
39 *ggplot2* to output high-standard figures. The data storage structure uses a S4-like  
40 storage system to store all relevant data as a single experiment-level object, thus  
41 making it easier to share data and reproduce the analysis. Subsequently, the packages  
42 *microbiome* (<https://github.com/microbiome/microbiome>), the *MicrobiomeAnalystR*  
43 (Chong et al., 2020), *microViz* (Barnett et al., 2021), and *microbiomeSeq* emerged  
44 under this framework. Subsequently, the *microeco* package according to the S6  
45 framework, which provides more analysis functions. With the need for data  
46 interactive analysis, *Animalcules* (Zhao et al., 2021) emerged. *EasyMicroPlot*  
47 (<https://github.com/xielab2017/EasyMicroPlot>) also uses an interactive interface for  
48 microbiome data exploration, allowing for rapid downstream analysis of the  
49 microbiome (Fig. 3; Table 1).  
50  
51  
52  
53  
54

## 55 Microbiome data analysis using phyloseq

56  
57 *Phyloseq*, using the S4 class object, is more suitable for object-oriented programming  
58 and has had a great impact on microbiome data analysis (Figs. 2, 3, Fig. and S2A—  
59  
60

G, Pipeline 1. phyloseq.Rmd). Through the S4 class object, phyloseq allows the five parts of data (the feature table, feature annotation, metadata, representative sequences, and evolutionary tree) to maintain correspondence under the same framework, and provides a variety of multiple filtering functions on microbial features and samples, allowing the five parts of data to be filtered consistently without considering different among data. It also provides microbiome analysis through microbial data filtering and normalization, diversity calculation (Fig. S2A- and S2B), microbial composition visualization (Fig. S2C- and S2D), evolutionary tree visualization, and network analysis (Fig. S2E). The beta diversity function provides more than 30 distance algorithms, far more than those provided by packages such as vegan. Secondly, the phyloseq package uses ggplot for graphical visualization (Fig. S2F), which is easier to generate and modify figures. Additionally, phyloseq can integrate the evolutionary tree and feature taxonomic and abundance on tree branches and leaves (Fig. S2G), which makes the tree informative and beautiful.

### **Microbiome data analysis using microbiome**

The microbiome package also uses S4 class objects, like **phyloseq**, and can also perform most of the analysis of microbiomes (Figs. 2/3, Fig. and S3A-G, Pipeline 2. Microbiome.Rmd). It includes microbial diversity analysis (Fig. S3A-E), and difference analysis (Fig. S3F- and S3G). Compared with phyloseq, the microbiome package is richer in alpha diversity indicators, which provides more than 30 alpha diversity indicators. Secondly, it provides core microbial calculation and visualization functions. In general, it can be used as a complement to phyloseq or in conjunction with it.

### **Microbiome data analysis using MicrobiomeAnalystR**

MicrobiomeAnalystR is an R package version according to the MicrobiomeAnalyst webserver (Figs. 2/3, Fig. and S4A-J, Pipeline 3. MicrobiomeAnalystR.Rmd).

These functions include diversity analysis (Fig. S4A-F), difference analysis (Fig. S4G), biomarker identification (Fig. S4H- and S4I), sample sequencing library size overview (Fig. S4J), which are more powerful than the previous two packages. The visualization combines basic packages, ggplot plotting, and interactive plotting. In terms of network analysis, it provides the process of calculating and plotting SparCC networks that are more suitable for microbiome data. However, the package depends on many R packages from CRAN, Bioconductor, and GitHub, so a complete installation of MicrobiomeAnalystR requires a lot of effort.

### **Microbiome data analysis using Animalcules**

The **Animalcules** package is an alternative way to analysis in an interactive platform (Figs. 2/3, Fig. and S5A-J, Pipeline 4. Animalcules.Rmd). It is possible to

1  
2  
3 calculate and plot sample statistics in bar plot (Fig. S5A) or interactive pie charts (Fig.  
4 S5B), calculate, and visualize alpha diversity dot plot (Fig. S5C), group microbial  
5 taxonomic or functional composition heatmap and stack plot (Fig. S5D- [and S5E](#)),  
6 feature abundance in boxplot (Fig. S5F), genus bray distance heatmap (Fig. S5G),  
7 ordination analysis (Fig. S5H- [and S5I](#)), using randomforest, logistic regression to  
8 select biomarkers (Fig. S5J), and other analyses. The results of these analyses can  
9 often be reanalyzed by interactively modifying parameters, and the images can be  
10 interactively zoomed in and out, clicked to see details, and other operations performed  
11 by the mouse for better pattern discovery. However, the results cannot be exported as  
12 vector format, which do not meet the requirements for publication. Secondly, the  
13 analysis content is too little, especially the microbiome network analysis, the  
14 correlation analysis between the microbiome and other indicators.

### 19 **Microbiome data analysis using microeco**

20  
21 The microeco package is very powerful, using R6 class data structure (Figs. [2/3, Fig.](#)  
22 [and S6A--L](#), Pipeline 5. `microeco.Rmd`). It includes microbial diversity (Fig. S6A/B)  
23 taxonomic composition (Fig. S6C--E), difference (Fig. S6F--H), biomarker (Fig. S6I-  
24 [and S6J](#)), network (Fig. S6K), integrated community structure with environmental  
25 factor (Fig. S6L), and phylogenetic diversity analysis. It can complete almost all the  
26 current microbiome analysis contents. However, it is not suitable for novices because  
27 there is a certain threshold for using S6 class objects. In addition, due to too many  
28 functions, the requirements for input data are different, causing some functions are  
29 hard to use.

### 36 **Microbiome data analysis using amplicon**

37  
38 The package amplicon is an analysis and plotting tool (Figs. [2/3, Fig. and S7A--I](#),  
39 Pipeline 6. `Amplicon.Rmd`) within the microbiome analysis toolkit EasyMicrobiome  
40 (Liu et al., 2023). It enables various diversity analyses, including alpha diversity (Fig.  
41 S7A), rarefaction curve (Fig. S7B), clustering distance heatmap (Fig. S7C) and PCoA  
42 (Fig. S7D), NMDS, LDA and PCA, taxonomic composition (Fig. S7E- [and S7F](#)),  
43 difference analysis (Fig. S7G- [and S7H](#)). Then, it can easily generate high-quality  
44 figures such as boxplots, scatter plots for diversity analysis, stacked bar plots, circlize  
45 plots, and map trees for taxonomic or functional composition. One of its notable  
46 features is its ability to finely adjust the presentation of figures, resulting in  
47 published-ready figures. Additionally, several tools within the amplicon package are  
48 available for microbiome data transformation, facilitating subsequent analysis using  
49 tools such as LEfSe and STAMP. However, at the current version, the amplicon  
50 package does not provide some functions for network analysis, analysis of  
51 microbiome-environment interactions, and analysis of community formation  
52 processes. The authors provide some scripts in EasyAmplicon pipeline to do this,  
53 mentioned in the published paper plan to finish these functions in the future.  
54  
55  
56  
57  
58  
59  
60

## The best practice for microbiome data analysis in R

The abundance of R packages can hinder microbiome researchers from efficiently selecting appropriate R packages for microbiome-related analyses. Therefore, we organized and selected efficient, commonly used, and user-friendly functions for microbiome data analysis in six categories (Fig. S8): 1) diversity analysis (Figs. S9A–I; Figs. and S10A–E), 2) difference analysis (Figs. S10F–I; Figs. S11A– and S11B), 3) biomarker identification (Figs. S11C– and S11D), 4) correlation and network analysis (Figs. S11E–I), 5) functional prediction, 6) other microbiome analyses (Figs. S12A–I). All the script can be found in the file Pipeline.BestPractice.Rmd. This led to develop a better microbiome data analysis pipeline.

In this pipeline, we used the amplicon package for alpha diversity rarefaction curve (Figs. 4A; Fig. and S9A) and PCoA analysis (Figs. 4B; Fig. and S9B), ggplot2 package for visualization of microbial community composition, ggClusterNet for constructing Venn network (Chen et al., 2021) (Fig. 4C), ggtree and ggtrextre for building evolutionary trees (Fig. 4D), and LEfSe for generating cladograms (Fig. 4E). We employed the stst4, ggplot2, and cowplot packages for difference analysis and generated STAMP plots (Fig. 4F), used edgeR for difference analysis and visualized in Manhattan plots (Fig. 4G), and applied DESeq2 for difference analysis and generated multi-group volcano plots (Fig. 4H). We also used the el071, caret, randomforest, ROC packages for various machine learning analyses and generated microbiome weighted plots (Fig. 4I). Furthermore, we used ggClusterNet for microbiome network analysis (Fig. 4J), constructed network graphs and combined plots to explore the associations between environmental factors and microbiome communities (Fig. 4K). Finally, we used the FEAST package to perform community source tracking analysis and constructed pie charts (Fig. 4L). Other analyses included stacked bar charts of microbial community composition (Figs. S9E/H), chord diagrams (Fig. S10A), Venn diagrams (Fig. S10C), Upset diagrams (Fig. S10D), difference analysis volcano plots (Fig. S10F), functional prediction etc.

## Perspective and conclusions

In the past ten years, the R language and numerous R packages have played an important role in the microbiome data analysis. R language is easy to use and get started. It has attracted many researchers to learn about it. However, there are still some contradictions between supply and demand in the microbiome data analysis. For example, it is often difficult to support multi-threading under the Windows system; secondly, the speed of many R packages running is relatively slow, although some R packages are written in other languages as supplements; third, the application in microbiome still needs further development. For instance, there is a shortage of

1  
2  
3 packages that allow for the exploration of time-series-based microbial compositions,  
4 as well as more robust interactive packages for analyzing complex microbial data.  
5 Furthermore, ggplot2 lacks the capability to create complex and combined figures,  
6 which fails to meet the visualization requirements for relationships between multiple  
7 intricate indicators with microbial community data. Therefore, developing new R  
8 packages that are more suitable for drawing complex figures and composite figures  
9 would be necessary for microbiome data.  
10  
11

12 With the development of sequencing technology, data analysis methods have  
13 advanced along with the development of R packages contributed to the field of  
14 microbiome. These R packages range from classic R packages such as vegan, which  
15 has been cited more than 10,000 times, to integrated R packages such as phyloseq,  
16 which contain many functions in one package and set a unified data processing  
17 framework. These R packages have been able to implement most of the functions of  
18 microbiome analysis, from microbial diversity, difference, biomarker identification,  
19 correlation and network, phylogenetic analysis, etc. However, these R packages have  
20 some redundant functions; for example, phyloseq, microbiome, and others can do  
21 microbial diversity analysis. The difference is only in the visualization method and  
22 scheme. A similar situation has always existed in microbiome analysis R packages, so  
23 we hope that in future developments we will try to de-redundantly use the same part  
24 of the content or similar content to highlight the advantages of R packages.  
25  
26

27 Although these R packages can conduct a lot of functions, they don't well  
28 enough in some specific analyses, for example, alpha and beta diversity analysis, and  
29 the outgoing graphs often not add difference detection results to visualize the  
30 differences from the figures. In addition, there are still some contents that can  
31 continue to be developed, such as applying more machine learning methods to  
32 microbiome data and its learning method, model, and important variable evaluation.  
33 Secondly, metagenomes are becoming more widely used, and the support of species  
34 and functional annotation results based on Kraken (Wood and Salzberg, 2014),  
35 MEGAN (Huson et al., 2007), MetaPhlan2 (Truong et al., 2015), HUMAnN2  
36 (Franzosa et al., 2018), eggNOG-mapper (Huerta-Cepas et al., 2017), etc. is becoming  
37 more and more important, and these make the data processed by R rise from  
38 megabyte (M) to gigabyte (G). Therefore, Faster data processing R packages should  
39 be used to the microbiome data analysis process, such as data.table, fst, tidyfst etc.  
40  
41

42 The use of appropriate data structures can accelerate the microbiome data  
43 processing. At first, we used S4 class objects for microbiome data encapsulation,  
44 which can complete a variety of analyses comprehensively and efficiently. The  
45 emergence of S6 class objects and other objects has greatly impacted microbiome data  
46 processing and largely facilitates it. With the development of the tidy family of R  
47 languages, tidy-based data structures have recently emerged for microbiome data  
48 mining. For example, the MicrobiotaProcess package (Xu et al., 2023). This structure  
49 is more suitable for microbiome data mining, machine learning modeling, and other  
50 analyses, which can more easily extract the influence of experimental design, time,  
51 space, and other factors on microbiome data in analysis, to discover the deep-seated  
52 patterns. We expect the R language to make microbiome analysis more efficient and  
53  
54  
55  
56  
57  
58  
59  
60

help everyone discover more about its role in humans, animals, plants, and the environment, and use it for our benefit to make the world a better place.

## Supplementary information

The online version contains Figure S1–12, and Table S1.

### Declarations

#### Funding

This study was financially supported by the Agricultural Science and Technology Innovation Program (CAAS-ZDRW202308), the Natural Science Foundation of China (42277297, 42090060, U21A20182), Jiangsu Funding Program for Excellent Postdoctoral Talent (2022ZB325), Scientific and technology innovation project of China Academy of Chinese Medical Sciences (C12021A04115), the Fundamental Research Funds for the Central public welfare research institutes (ZZ13-YQ-095).

#### Competing interests

The authors declare no competing interests related to the content of this paper.

#### Ethics approval

Not applicable.

#### Consent to participate

Not applicable.

#### Consent for publication

All authors agree to publish.

#### Data availability

No new sequencing data generated by this project.

#### Code availability

All the demo data and scripts are available in GitHub: <https://github.com/taowenmicro/EasyMicrobiomeR>.

#### Author contributions

J.Y. and Y.L. conceived and supervised the project; T.W. and G.N. implement this project and wrote the paper; Y.L., T.C., and Q.S provided critical comments and revised the paper.

#### Acknowledgments

We thank all the people star and fork this project in GitHub and feedback the useful

1  
2  
3  
4  
5  
6  
7  
8  
9  
10  
11  
12  
13  
14  
15  
16  
17  
18  
19  
20  
21  
22  
23  
24  
25  
26  
27  
28  
29  
30  
31  
32  
33  
34  
35  
36  
37  
38  
39  
40  
41  
42  
43  
44  
45  
46  
47  
48  
49  
50  
51  
52  
53  
54  
55  
56  
57  
58  
59  
60

comments.

## Abbreviations

ASV, an amplicon sequence variant; CCA, canonical correspondence analysis; CSS, cumulative-sum scaling; DCA, decision curve analysis; GO, gene ontology; GSEA, gene set enrichment analysis; GSVA, gene set variation analysis; KEGG, kyoto encyclopedia of genes and genomes; LDA, linear discriminant analysis; LefSe, linear discriminant analysis effect size; NMDS, non-metric multidimensional scaling; OTU, operational taxonomic unit; PCA, principal components analysis; PCoA, principal coordinate analysis; RLE, relative log expression; ROC, receiver operating characteristic curve; TMM, trimmed mean of M-values; UQ, upper quartile; MED, median of ratios method.

## References

- Amir A, McDonald D, Navas-Molina JA *et al.* Deblur Rapidly Resolves Single-Nucleotide Community Sequence Patterns. *MSystems* 2017;**2**:e00191-00116.
- Aßhauer KP, Wemheuer B, Daniel R *et al.* Tax4Fun: predicting functional profiles from metagenomic 16S rRNA data. *Bioinformatics* 2015;**31**:2882-2884.
- Barnett DJ, Arts IC, Penders J. microViz: an R package for microbiome data visualization and statistics. *Journal of Open Source Software* 2021;**6**:3201.
- Bolyen E, Rideout JR, Dillon MR *et al.* Reproducible, interactive, scalable and extensible microbiome data science using QIIME 2. *Nature Biotechnology* 2019;**37**:852-857.
- Callahan BJ, McMurdie PJ, Rosen MJ *et al.* DADA2: High-resolution sample inference from Illumina amplicon data. *Nature Methods* 2016;**13**:581-583.
- Caporaso JG, Kuczynski J, Stombaugh J *et al.* QIIME allows analysis of high-throughput community sequencing data. *Nature Methods* 2010;**7**:335-336.
- Carrión VJ, Perez-Jaramillo J, Cordovez V *et al.* Pathogen-induced activation of disease-suppressive functions in the endophytic root microbiome. *Science* 2019;**366**:606-612.
- Chen H, Boutros PC. VennDiagram: a package for the generation of highly-customizable Venn and Euler diagrams in R. *BMC bioinformatics* 2011;**12**:1-7.
- Chen T, Zhang H, Liu Y *et al.* EVenn: Easy to create repeatable and editable Venn diagrams and Venn networks online. *Journal of Genetics and Genomics* 2021;**48**:863-866.
- Chen Y, Li J, Zhang Y *et al.* Parallel-Meta Suite: Interactive and rapid microbiome data analysis on multiple platforms. *iMeta* 2022;**1**:e1.
- Chong J, Liu P, Zhou G *et al.* Using MicrobiomeAnalyst for comprehensive statistical, functional, and meta-analysis of microbiome data. *Nature Protocols* 2020;**15**:799-821.
- Conway JR, Lex A, Gehlenborg N. UpSetR: an R package for the visualization of intersecting sets and their properties. *Bioinformatics* 2017;**33**:2938-2940.
- Dimitriadou E, Hornik K, Leisch F *et al.* Misc functions of the Department of Statistics (e1071), TU Wien. *R package* 2008;**1**:5-24.
- Dray S, Blanchet G, Borcard D *et al.* Package ‘adespatial’. 2018;**2018**:3-8.
- Dray S, Dufour A-B. The ade4 package: implementing the duality diagram for ecologists. *Journal of statistical software* 2007;**22**:1-20.
- Edgar RC. Search and clustering orders of magnitude faster than BLAST. *Bioinformatics*



- 2010;**26**:2460-2461.
- Edgar RC, Flyvbjerg H. Error filtering, pair assembly and error correction for next-generation sequencing reads. *Bioinformatics* 2015;**31**:3476-3482.
- Fisher RA. The use of multiple measurements in taxonomic problems. *Annals of eugenics* 1936;**7**:179-188.
- Franzosa EA, McIver LJ, Rahnavaard G *et al.* Species-level functional profiling of metagenomes and metatranscriptomes. *Nature methods* 2018;**15**:962-968.
- Gu Z. Complex heatmap visualization. *iMeta* 2022;**1**:e43.
- Gu Z, Gu L, Eils R *et al.* circlize implements and enhances circular visualization in R. *Bioinformatics* 2014;**30**:2811-2812.
- Hamilton NE, Ferry M. ggtern: Ternary diagrams using ggplot2. *Journal of Statistical Software* 2018;**87**:1-17.
- Harrell Jr FE, Harrell Jr MFE. Package 'hmisc'. *CRAN2018* 2019;**2019**:235-236.
- Hofner B, Mayr A, Robinzonov N *et al.* Model-based boosting in R: a hands-on tutorial using the R package mboost. *Computational statistics* 2014;**29**:3-35.
- Huerta-Cepas J, Forslund K, Coelho LP *et al.* Fast genome-wide functional annotation through orthology assignment by eggNOG-mapper. *Molecular biology evolution* 2017;**34**:2115-2122.
- Huson DH, Auch AF, Qi J *et al.* MEGAN analysis of metagenomic data. *Genome Res* 2007;**17**:377-386.
- Ihaka R, Gentleman R. R: A Language for Data Analysis and Graphics. *Journal of Computational and Graphical Statistics* 1996;**5**:299-314.
- Kembel SW, Cowan PD, Helmus MR *et al.* Picante: R tools for integrating phylogenies and ecology. *Bioinformatics* 2010;**26**:1463-1464.
- Knights D, Kuczynski J, Charlson ES *et al.* Bayesian community-wide culture-independent microbial source tracking. *Nature methods* 2011;**8**:761-763.
- Kuhn M. Building Predictive Models in R Using the caret Package. *Journal of Statistical Software* 2008;**28**:1-26.
- Kurtz ZD, Müller CL, Miraldi ER *et al.* Sparse and Compositionally Robust Inference of Microbial Ecological Networks. *PLOS Computational Biology* 2015;**11**:e1004226.
- Langfelder P, Horvath S. WGCNA: an R package for weighted correlation network analysis. *BMC bioinformatics* 2008;**9**:1-13.
- Li W, Wang L, Li X *et al.* Sequence-based Functional Metagenomics Reveals Novel Natural Diversity of Functioning CopA in Environmental Microbiomes. *Genomics Proteomics Bioinformatics* 2022;**20**:1-12.
- Liaw A, Wiener M. Classification and regression by randomForest. *R news* 2002;**2**:18-22.
- Lin H, Peddada SD. Analysis of microbial compositions: a review of normalization and differential abundance analysis. *NPJ biofilms and microbiomes* 2020;**6**:1-13.
- Liu C, Cui Y, Li X *et al.* microeco: an R package for data mining in microbial community ecology. *FEMS Microbiology Ecology* 2020;**97**:fiae255.
- Liu Y, Qin Y, Chen T *et al.* A practical guide to amplicon and metagenomic analysis of microbiome data. *Protein & cell* 2021;**12**:315-330.
- Liu YX, Chen L, Ma T *et al.* EasyAmplicon: An easy-to-use, open-source, reproducible, and community-based pipeline for amplicon data analysis in microbiome research. *iMeta* 2023;**2**:e83.
- Louca S, Parfrey LW, Doebeli M. Decoupling function and taxonomy in the global ocean microbiome.

- 1  
2  
3 *Science* 2016;**353**:1272-1277.
- 4 Love MI, Huber W, Anders S. Moderated estimation of fold change and dispersion for RNA-seq data  
5 with DESeq2. *Genome biology* 2014;**15**:1-21.
- 6 McMurdie PJ, Holmes S. phyloseq: an R package for reproducible interactive analysis and graphics of  
7 microbiome census data. *PloS one* 2013;**8**:e61217.
- 8 Metcalf JL, Xu ZZ, Weiss S *et al.* Microbial community assembly and metabolic function during  
9 mammalian corpse decomposition. *Science* 2016;**351**:158-162.
- 10 Nearing JT, Douglas GM, Hayes MG *et al.* Microbiome differential abundance methods produce  
11 different results across 38 datasets. *Nature Communications* 2022;**13**:342.
- 12 Nguyen NH, Song Z, Bates ST *et al.* FUNGuild: An open annotation tool for parsing fungal  
13 community datasets by ecological guild. *Fungal Ecology* 2016;**20**:241-248.
- 14 Ning D, Yuan M, Wu L *et al.* A quantitative framework reveals ecological drivers of grassland  
15 microbial community assembly in response to warming. *Nature communications* 2020;**11**:4717.
- 16 Oksanen J, Kindt R, Legendre P *et al.* The vegan package. *Community ecology package* 2007;**10**:719.
- 17 Pages H, Aboyoun P, Gentleman R *et al.* Biostrings: String objects representing biological sequences,  
18 and matching algorithms. *R package version* 2016;**2**:10.18129.
- 19 Paoli L, Ruscheweyh H-J, Forneris CC *et al.* Biosynthetic potential of the global ocean microbiome.  
20 *Nature* 2022;**607**:111-118.
- 21 Pasolli E, Schiffer L, Manghi P *et al.* Accessible, curated metagenomic data through ExperimentHub.  
22 *Nature Methods* 2017;**14**:1023-1024.
- 23 Proctor LM, Creasy HH, Fettweis JM *et al.* The Integrative Human Microbiome Project. *Nature*  
24 2019;**569**:641-648.
- 25 Revelle W, Revelle MW. Package 'psych'. *The comprehensive R archive network* 2015;**337**:338.
- 26 Ripley B, Venables B, Bates DM *et al.* Package 'mass'. *Cran r* 2013;**538**:113-120.
- 27 Robin X, Turck N, Hainard A *et al.* pROC: an open-source package for R and S+ to analyze and  
28 compare ROC curves. *BMC bioinformatics* 2011;**12**:1-8.
- 29 Robinson MD, McCarthy DJ, Smyth GK. edgeR: a Bioconductor package for differential expression  
30 analysis of digital gene expression data. *Bioinformatics* 2009;**26**:139-140.
- 31 Rognes T, Flouri T, Nichols B *et al.* VSEARCH: a versatile open source tool for metagenomics. *PeerJ*  
32 2016;**4**:e2584.
- 33 Schloss PD, Westcott SL, Ryabin T *et al.* Introducing mothur: open-source, platform-independent,  
34 community-supported software for describing and comparing microbial communities. *Applied and*  
35 *environmental microbiology* 2009;**75**:7537-7541.
- 36 Shenhav L, Thompson M, Joseph TA *et al.* FEAST: fast expectation-maximization for microbial  
37 source tracking. *Nature Methods* 2019;**16**:627-632.
- 38 Si B, Liang Y, Zhao J *et al.* GGraph: An Efficient Structure-Aware Approach for Iterative Graph  
39 Processing. *IEEE Transactions on Big Data* 2022;**8**:1182-1194.
- 40 Stegen JC, Lin X, Fredrickson JK *et al.* Quantifying community assembly processes and identifying  
41 features that impose them. *The ISME journal* 2013;**7**:2069-2079.
- 42 Thompson LR, Sanders JG, McDonald D *et al.* A communal catalogue reveals Earth's multiscale  
43 microbial diversity. *Nature* 2017;**551**:457-463.
- 44 Truong DT, Franzosa EA, Tickle TL *et al.* MetaPhlan2 for enhanced metagenomic taxonomic  
45 profiling. *Nature Methods* 2015;**12**:902-903.
- 46 Wemheuer F, Taylor JA, Daniel R *et al.* Tax4Fun2: prediction of habitat-specific functional profiles  
47  
48  
49  
50  
51  
52  
53  
54  
55  
56  
57  
58  
59  
60

1  
2  
3 and functional redundancy based on 16S rRNA gene sequences. *Environmental Microbiome*  
4 2020;**15**:11.

5  
6 Wen T, Xie P, Yang S *et al.* ggClusterNet: An R package for microbiome network analysis and  
7 modularity-based multiple network layouts. *iMeta* 2022;**1**:e32.

8 Wickham H. Reshaping Data with the reshape Package. *Journal of Statistical Software* 2007;**21**:1-20.

9  
10 Wickham H. ggplot2. *Wiley interdisciplinary reviews: computational statistics* 2011a;**3**:180-185.

11 Wickham H. The Split-Apply-Combine Strategy for Data Analysis. *Journal of Statistical Software*  
12 2011b;**40**:1-29.

13  
14 Wirbel J, Zych K, Essex M *et al.* Microbiome meta-analysis and cross-disease comparison enabled by  
15 the SIAMCAT machine learning toolbox. *Genome Biology* 2021;**22**:93.

16 Wood DE, Salzberg SL. Kraken: ultrafast metagenomic sequence classification using exact alignments.  
17 *Genome biology* 2014;**15**:1-12.

18  
19 Xu S, Li L, Luo X *et al.* Ggtree: A serialized data object for visualization of a phylogenetic tree and  
20 annotation data. *iMeta* 2022;**1**:e56.

21 Xu S, Zhan L, Tang W *et al.* MicrobiotaProcess: A comprehensive R package for deep mining  
22 microbiome. *The Innovation* 2023;**4**:100388.

23  
24 Zhao Y, Federico A, Faits T *et al.* animalcules: interactive microbiome analytics and visualization in R.  
25 *Microbiome* 2021;**9**:1-16.  
26  
27  
28  
29  
30  
31  
32  
33  
34  
35  
36  
37  
38  
39  
40  
41  
42  
43  
44  
45  
46  
47  
48  
49  
50  
51  
52  
53  
54  
55  
56  
57  
58  
59  
60

1  
2  
3  
4  
5  
6  
7  
8  
9  
10  
11  
12  
13  
14  
15  
16  
17  
18  
19  
20  
21  
22  
23  
24  
25  
26  
27  
28  
29  
30  
31  
32  
33  
34  
35  
36  
37  
38  
39  
40  
41  
42  
43  
44  
45  
46

**Table 1. Comparison of the advantages and limitations of the six integrated R packages.**

| R package                        | Function                                                                                                                                                                                                                              | Advantages                                                                                                                                                                                                                                                                                                                                                                                                                                                                                                                   | Limitations                                                                                                                                                                                                                                                                                                                                                  |
|----------------------------------|---------------------------------------------------------------------------------------------------------------------------------------------------------------------------------------------------------------------------------------|------------------------------------------------------------------------------------------------------------------------------------------------------------------------------------------------------------------------------------------------------------------------------------------------------------------------------------------------------------------------------------------------------------------------------------------------------------------------------------------------------------------------------|--------------------------------------------------------------------------------------------------------------------------------------------------------------------------------------------------------------------------------------------------------------------------------------------------------------------------------------------------------------|
| phyloseq                         | <ol style="list-style-type: none"> <li>1. Diversity analysis including alpha-/beta diversity, community composition, and phylogenetic tree analysis.</li> <li>2. Network analysis.</li> </ol>                                         | <ol style="list-style-type: none"> <li>1. Firstly utilize S4 class objects.</li> <li>2. Possess lots of analysis functions based on phyloseq objects.</li> <li>3. The network analysis process is simplified (Fig. S2E).</li> <li>4. Ordinate analysis can be applied to arrange the order of samples and microbes on heatmap rows and columns (Fig. S2F).</li> <li>5. Combine evolutionary trees with microbial abundance to display species richness (Fig. S2G).</li> <li>6. Offer over 30 distance algorithms.</li> </ol> | <ol style="list-style-type: none"> <li>1. Introduction to phyloseq objects can be challenging for beginners.</li> <li>2. Statistical tests, including diversity tests and community/feature-level microbial difference analysis, are not well integrated into community analysis.</li> <li>3. Network analysis lacks test, attribute calculation.</li> </ol> |
| <del>microbiome</del> Microbiome | <ol style="list-style-type: none"> <li>1. Diversity analysis only including alpha-/beta diversity, community composition.</li> </ol>                                                                                                  | <ol style="list-style-type: none"> <li>1. The alpha diversity index is abundance.</li> <li>2. The t-SNE and CAP ordination algorithms.</li> <li>3. The stacked bar chart for community composition analysis can be sorted by specified microbial features (Fig. S3C).</li> <li>4. Visualization of individual microbes (Fig. S3D).</li> </ol>                                                                                                                                                                                | <ol style="list-style-type: none"> <li>1. The t-SNE and CAP ordination analyses frequently encounter errors.</li> <li>2. The statistical tests, including diversity tests, community and feature-level differences tests is not ideal.</li> </ol>                                                                                                            |
| Microbiome AnalystR              | <ol style="list-style-type: none"> <li>1. Diversity analysis including alpha/beta diversity, community composition, and phylogenetic tree analysis.</li> <li>2. Difference analysis.</li> <li>3. Biomarker identification.</li> </ol> | <ol style="list-style-type: none"> <li>1. Various functions ranging from data cleaning to visualization.</li> <li>2. Multiple algorithms to correct sequencing errors, leading more accurate evaluation of abundance.</li> <li>3. Machine learning can be utilized to extract feature variables (Fig. S4H).</li> <li>4. Difference analysis using multiple methods, such as</li> </ol>                                                                                                                                       | <ol style="list-style-type: none"> <li>1. Difficulties in installing R packages with dependencies.</li> <li>2. Some functions may not work, including network analysis and difference analysis of relative abundance.</li> <li>3. Insufficient explanation of parameters</li> </ol>                                                                          |

|              |                                                                                                                                                                                                                                                     | LefSe or metagenomeSeq.                                                                                                                                                                                                                                                                                                                                                                           | and examples.                                                                                                                                                                                          |
|--------------|-----------------------------------------------------------------------------------------------------------------------------------------------------------------------------------------------------------------------------------------------------|---------------------------------------------------------------------------------------------------------------------------------------------------------------------------------------------------------------------------------------------------------------------------------------------------------------------------------------------------------------------------------------------------|--------------------------------------------------------------------------------------------------------------------------------------------------------------------------------------------------------|
| Animalcules  | <ol style="list-style-type: none"> <li>1. Diversity analysis.</li> <li>2. Difference analysis and biomarker identification.</li> </ol>                                                                                                              | <ol style="list-style-type: none"> <li>1. SummarizedExperiment package supported.</li> <li>2. Interactively executed in R (Fig. S5A–J).</li> <li>3. A 3D clustering plot can be generated.</li> </ol>                                                                                                                                                                                             | <ol style="list-style-type: none"> <li>1. Unable to save vector graphics and completed tables.</li> <li>2. Insufficient functionality.</li> </ol>                                                      |
| microeco     | <ol style="list-style-type: none"> <li>1. Diversity analysis.</li> <li>2. Difference analysis.</li> <li>3. Biomarker identification.</li> <li>4. Network, correlation analysis with other indicators.</li> <li>5. Functional prediction.</li> </ol> | <ol style="list-style-type: none"> <li>1. R6 class more expansibility than phyloseq objects.</li> <li>2. Simple function calling.</li> <li>3. Rich plots of diversity and difference analysis (Fig. S6A–H).</li> <li>4. Unique correlation analysis of other indicators.</li> <li>5. Network analysis functionality (Fig. S6K).</li> <li>6. FAPROTAX and FUNGuild function prediction.</li> </ol> | <ol style="list-style-type: none"> <li>1. New data structures increase the cost of learning time.</li> <li>2. So many functions and dependency caused frequent some malfunctioning.</li> </ol>         |
| EasyAmplicon | <ol style="list-style-type: none"> <li>1. Diversity analysis.</li> <li>2. Provide script for preparing STAMP, LefSe, PICRUSt 1&amp;2, BugBase, FAPROTAX, iTOL.</li> <li>3. Provide slide tutorial for many analyses, such as QIIME 2.</li> </ol>    | <ol style="list-style-type: none"> <li>1. It can be used in both command-line mode and interactive mode within RStudio.</li> <li>2. It offers multiple visualization styles, allowing for easy generation of publication-quality figures (Fig. S7).</li> <li>3. Its open-source code facilitates reproducible analysis and allows for personalized modifications.</li> </ol>                      | <ol style="list-style-type: none"> <li>1. Need using the most popular tools, STAMP, LefSe, PICRUSt 1&amp;2, BugBase, FAPROTAX, and iTOL.</li> <li>2. Some functions need to be development.</li> </ol> |

## Figures & Legends

### **Figure 1. Microbial community data analysis workflow and related R packages.**

(A) Overview of microbial community data analysis workflow. Core files are feature table (OTU), Taxonomy, sample metadata (Metadata), phylogenetic tree (Tree), and representative sequences (Rep.fa). (B) Detail of microbial community analysis workflow. First, the raw data can be processed by using USEARCH/VSEARCH, QIIME 2, DADA2 packages. Then, the important files are saved and used for downstream analysis in R language and RStudio software. Many microbial analysis methods rely on numerous R packages developed with R language. The font size in the word cloud represents the number of citations of R packages. (C) Commonly used R packages for data cleaning/manipulation and visualization. (D) Classification of R packages for six categories in microbial community analysis.

### **Figure 2. Introduction to the functions of integrated microbial analysis R packages.**

Microbial community analysis can be divided into diversity analysis, difference analysis, biomarker identification, correlation and network analysis, functional prediction, and other microbial community analysis (community building/construction process, association analysis with other indicators).

### **Figure 3. Typical results of integrated microbial community analysis R packages and comparison of similar results.**

Group the analysis results of multiple integrated R packages according to the major categories of microbial community analysis functions. Each main branch in the tree diagram represents a type of microbial community analysis, and there are a total of 10 main branches: feature diversity analysis including 1 alpha diversity analysis, 2 beta diversity analysis, 3 features (community taxonomic or functional) composition analysis, 4 evolutionary or taxonomic tree analysis; 5 difference analysis; 6 biomarker identification; 7 correlation and network analysis; 8 functional prediction; 9 community building/construction process analysis; 10 other analysis, such as association analysis with other indicators. Each leaf (circle) represents a style of the result displayed in the analysis, and the circle number around the outside of leaf represents the package number of the integrated R package that the analysis result comes from.

### **Figure 4. Examples of the best practice results of microbial community analysis in R language.**

The selected results include rarefaction curve (A), principal coordinate analysis scatter plot (B), Venn network graph (C), evolutionary tree (D), LEfSe cladogram (E), difference analysis extended error bar plot in STAMP style (F), difference analysis Manhattan plot (G), difference analysis multi-group volcano plot (H), biomarker selection ring-column chart (I), network graph (J), correlation connection combination graph (K), source tracing analysis pie chart (L).

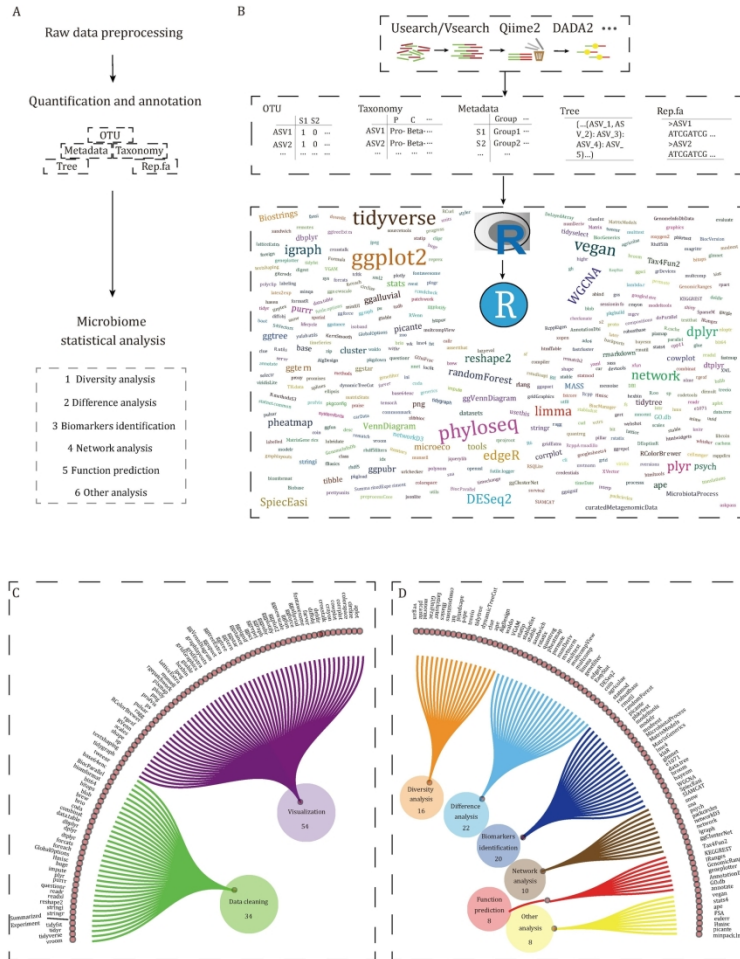

173x249mm (300 x 300 DPI)

1  
2  
3  
4  
5  
6  
7  
8  
9  
10  
11  
12  
13  
14  
15  
16  
17  
18  
19  
20  
21  
22  
23  
24  
25  
26  
27  
28  
29  
30  
31  
32  
33  
34  
35  
36  
37  
38  
39  
40  
41  
42  
43  
44  
45  
46  
47  
48  
49  
50  
51  
52  
53  
54  
55  
56  
57  
58  
59  
60

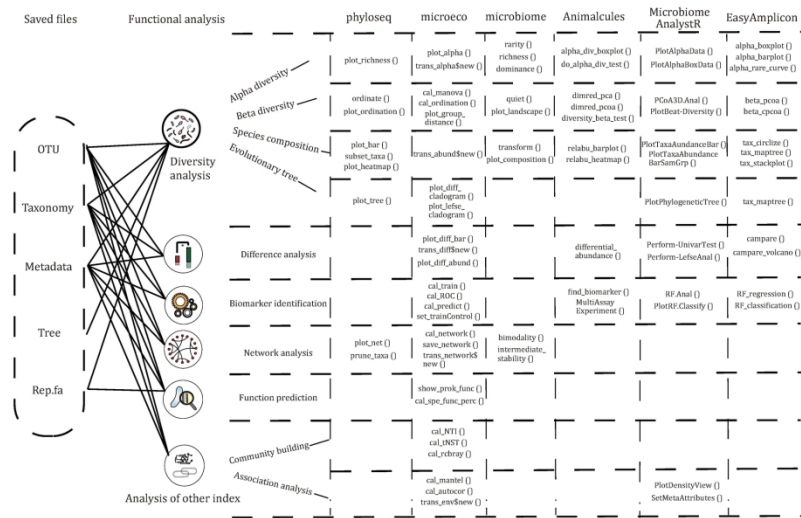

173x249mm (300 x 300 DPI)



1  
2  
3  
4  
5  
6  
7  
8  
9  
10  
11  
12  
13  
14  
15  
16  
17  
18  
19  
20  
21  
22  
23  
24  
25  
26  
27  
28  
29  
30  
31  
32  
33  
34  
35  
36  
37  
38  
39  
40  
41  
42  
43  
44  
45  
46  
47  
48  
49  
50  
51  
52  
53  
54  
55  
56  
57  
58  
59  
60

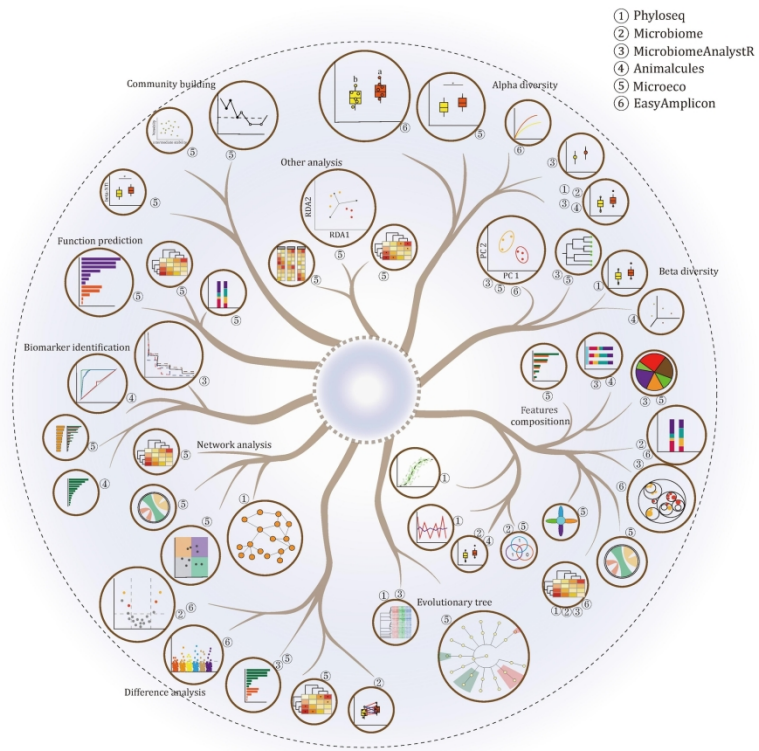

173x249mm (300 x 300 DPI)

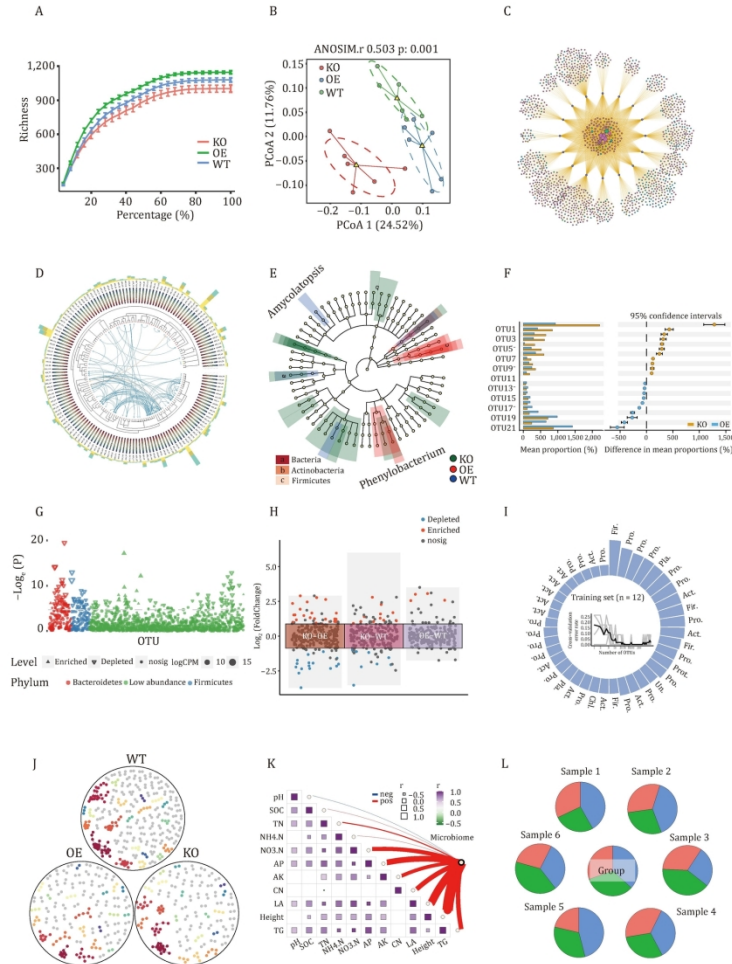

173x249mm (300 x 300 DPI)

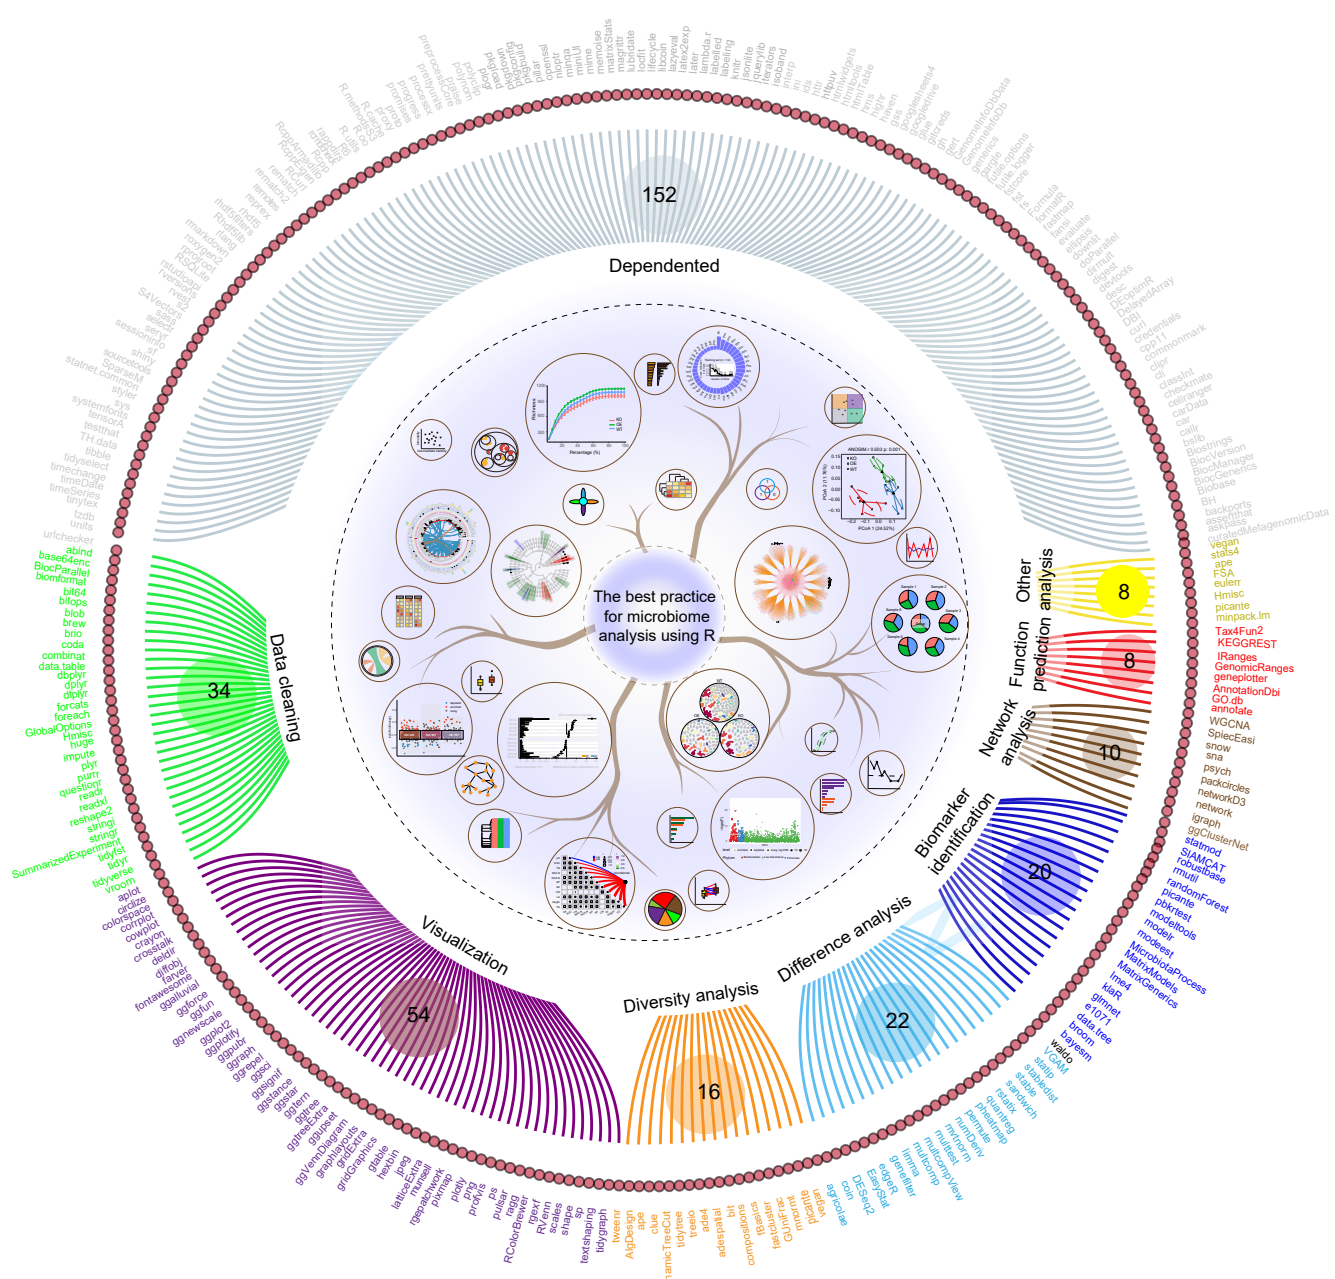

Supplement: pwad024_suppl_supplementary_material.pdf [file pwad024_suppl_supplementary_material.pdf]
